# Supplementary material for: Supracluster Rotaxanes with Adaptive Al8 Macrocycle for Tunable Optical Limiting
Source: Research Square preprint supplement (doi:10.21203/rs.3.rs-3893938/v1), 2024-02-07
Supplement: Supplementary file 1 [file 894c4ccce0ed9762b2c59254.docx]

**Supporting Information**

Supracluster Rotaxanes with Adaptive Al8 Macrocycle for Tunable Optical Limiting

Ya-Jie Liu, Chan Zheng, Di Wang, Han Xiao, Zirui Wang, Cheng-Yang Zhang, Xue-Zhen Zhang, San-Tai Wang, Ran-Qi Chen, Wei-Hui Fang* and Jian Zhang*

Table of Content

[**Experimental Section S2**](#_Toc156541097)

[**1. A summary of reported macrocycles used for constructing rotaxane S4**](#_Toc156541098)

[**2. Crystallographic data and structure refinement parameters S5**](#_Toc156541099)

[**3. Structure description for Al8 macrocycle S9**](#_Toc156541100)

[**4. BVS analysis for AlOC-137 to AlOC-149 S10**](#_Toc156541101)

[**5. PXRD analyses S15**](#_Toc156541102)

[**6. FT-IR analyses S19**](#_Toc156541103)

[**7. EDS analyses S23**](#_Toc156541104)

[**8. Reaction equations S28**](#_Toc156541105)

[**9. UV-vis analyses S29**](#_Toc156541106)

[**10. Structure description for AlOC-137 to AlOC-149 S33**](#_Toc156541107)

[**11. NLO analyses S51**](#_Toc156541108)

[**References S58**](#_Toc156541109)

Experimental Section

**Chemicals and Materials** All the reagents and solvents employed are purchased commercially and used as received without further purification. Al(OiPr)3 was acquired from Aladdin Chemical Reagent Shaihai. Acetonitrile (99%), 1-naphthoic acid (NA), AgNO3, silver acetate (AgAc) and 1,3-propylenediamine were bought from Sinopharm Chemical Reagent Beijing. Ti(OiPr)4, 4,4’-bipyridine (bpy), silver benzoate (AgBC), AgI, CuBr, tetrabutylammonium chloride (TBACl), tetrabutylammonium bromide (TBAB) and sodium anthraquinone-1-sulfonate (NaAQS) were purchased from Adamas-beta.

**Materials and Instrumentation.**

The energy dispersive spectroscopy (EDS) analyses of single crystals were performed on a JEOL JSM6700F field-emission scanning electron microscope equipped with an Oxford INCA system.

IR spectra (KBr pellets) were recorded on an ABB Bomem MB102 spectrometer over a range 600-3800 cm-1.

Powder X-ray diffraction (PXRD) data were collected on a Rigaku Mini Flex II diffractometer using CuKα radiation (*λ* = 1.54056 Å) under ambient conditions.

The UV-vis diffuse reflection data were recorded at room temperature using a powder sample with BaSO4 as a standard (100% reflectance) on a PerkinElmer Lamda-950 UV spectrophotometer and scanned at 190–1000 nm. The absorption data were calculated from the Kubelka-Munk function, (*F*(R) = (1-R)2/2R), where R represents the reflectance.1

**General methods for X-ray Crystallography.** Crystallographic data for compounds (**AlOC-137** to **AlOC-144**, **AlOC-146**, **AlOC-147** and **AlOC-149**) were collected on Hybrid Pixel Array detector equipped with graphite-monochromated Ga K*α* radiation (λ = 1.3405 Å). While the crystallographic data for **AlOC-145** and **AlOC-148** were collected on a Supernova single crystal diffractometer equipped with graphite-monochromatic Cu K*α* radiation (λ = 1.5418 Å). The structures were solved with direct methods using OLEX2 and refined by full-matrix least-squares on F2 using *SHELXTL*.2 Contributions to scattering due to disordered solvent molecules were removed using the *SQUEEZE* routine of *PLATON*. All hydrogen atoms were theoretical hydrogenation, riding on the concerned atoms and refined with fixed thermal factors. Non-hydrogen atoms were refined anisotropically.

**Solvothermal synthesis of AlOC-137.** Al(OiPr)3 (0.251 g, 1.23 mmol), 1-NA (0.432 g, 2.5 mmol) were mixed and dissolved in acetonitrile (10 mL) at room temperature. The resultant solution was heated at 80 oC for seven days. After cooling to room temperature, colorless block crystals of **AlOC-137** were obtained (maximum yield: ~20% for **AlOC-137** based on Al(OiPr)3).

**Solvothermal synthesis of AlOC-138.** Al(OiPr)3 (0.245 g, 1.20 mmol), 1-NA (0.518 g, 3.0 mmol), AgI (0.202 g, 0.86 mmol) were mixed and dissolved in acetonitrile (10 mL), then three drops 1,3-propylenediamine were added. The resultant solution was heated at 80 oC for seven days. After cooling to room temperature, faint yellow block crystals of **AlOC-138** were obtained (maximum yield: ~40% for **AlOC-138** based on Al(OiPr)3).

**Solvothermal synthesis of AlOC-139.** Al(OiPr)3 (0.199 g, 0.97 mmol), 1-NA (1.013 g, 5.89 mmol), AgBC (0.235 g, 1.03 mmol) were mixed and dissolved in acetonitrile (10 mL). The resultant solution was heated at 80 oC for seven days. After cooling to room temperature, colorless square crystals of **AlOC-139** were obtained (maximum yield: ~60% for **AlOC-139** based on Al(OiPr)3).

**Solvothermal synthesis of AlOC-140.** Al(OiPr)3 (0.256 g, 1.25 mmol), 1-NA (0.625 g, 3.63 mmol), TBACl (0.277 g, 1.00 mmol), AgBC (0.224 g, 0.98 mmol) were mixed and dissolved in acetonitrile (10 mL). The resultant solution was heated at 80 oC for seven days. After cooling to room temperature, faint yellow square crystals of **AlOC-140** were obtained (maximum yield: ~55% for **AlOC-140** based on Al(OiPr)3).

**Solvothermal synthesis of AlOC-141.** Al(OiPr)3 (0.257 g, 1.26 mmol), 1-NA (0.371 g, 2.16 mmol), 4,4’-bpy (0.158 g, 1.01 mmol), CuSCN (0.123 g, 1.02 mmol) were mixed and dissolved in acetonitrile (10 mL), then one drop Ti(OiPr)4 were added. The resultant solution was heated at 80 oC for seven days. After cooling to room temperature, yellow octahedral crystals of **AlOC-141** were obtained (maximum yield: ~16% for **AlOC-141** based on Al(OiPr)3).

**Solvothermal synthesis of AlOC-142.** Al(OiPr)3 (0.260 g, 1.27 mmol), 1-NA (0.395 g, 2.30 mmol), AgNO3 (0.152 g, 0.90 mmol), 4,4’-bpy (0.152 g, 0.97 mmol) were mixed and dissolved in acetonitrile (10 mL), then one drop Ti(OiPr)4 were added. The resultant solution was heated at 80 oC for seven days. After cooling to room temperature, yellow block crystals of **AlOC-142** were obtained (maximum yield: ~20% for **AlOC-142** based on Al(OiPr)3).

**Solvothermal synthesis of AlOC-143.** Al(OiPr)3 (0.245 g, 1.20 mmol), 1-NA (1.002 g, 5.83 mmol), silver acetate (0.162 g, 0.97 mmol) were mixed and dissolved in acetonitrile (10 mL). The resultant solution was heated at 80 oC for seven days. After cooling to room temperature, colorless square crystals of **AlOC-143** were obtained (maximum yield: ~80% for **AlOC-143** based on Al(OiPr)3).

**Solvothermal synthesis of AlOC-144.** Al(OiPr)3 (0.251 g, 1.23 mmol), 1-NA (0.623 g, 3.62 mmol), AgBC (0.222 g, 0.97 mmol) were mixed and dissolved in acetonitrile (10 mL). The resultant solution was heated at 80 oC for seven days. After cooling to room temperature, colorless square crystals of **AlOC-144** were obtained (maximum yield: ~80% for **AlOC-144** based on Al(OiPr)3).

**Solvothermal synthesis of AlOC-145.** Al(OiPr)3 (0.257 g, 1.26 mmol), 1-NA (0.395 g, 2.30 mmol), AgNO3 (0.186 g, 1.10 mmol), 4,4’-bpy (0.173 g, 1.11 mmol), NaAQS (0.02 g, 0.065 mmol) were mixed and dissolved in acetonitrile (10 mL), then one drop Ti(OiPr)4 was added. The resultant solution was heated at 80 oC for seven days. After cooling to room temperature, colorless parallelogram crystals of **AlOC-145** were obtained (maximum yield: ˂1% for **AlOC-145** based on Al(OiPr)3).

**Solvothermal synthesis of AlOC-146.** Al(OiPr)3 (0.263 g, 1.29 mmol), 1-NA (0.362 g, 2.10 mmol), AgNO3 (0.183 g, 1.08 mmol) and 4,4-bpy (0.160 g, 1.03 mmol) were mixed and dissolved in acetonitrile (10 mL), then 20 μL ethyl amine alcohol solution was added. The resultant solution was heated at 80 oC for seven days. After cooling to room temperature, colorless block crystals of **AlOC-146** were obtained (maximum yield: ~20% for **AlOC-146** based on Al(OiPr)3).

**Solvothermal synthesis of AlOC-147.** Al(OiPr)3 (0.258 g, 1.26 mmol), 1-NA (0.406 g, 2.36 mmol), AgNO3 (0.160 g, 0.94 mmol), 4,4’-bpy (0.170 g, 1.09 mmol) were mixed and dissolved in acetonitrile (10 mL). The resultant solution was heated at 80 oC for seven days. After cooling to room temperature, colorless square crystals of **AlOC-147** were obtained (maximum yield: ~65% for **AlOC-147** based on Al(OiPr)3).

**Solvothermal synthesis of AlOC-148.** Al(OiPr)3 (0.257 g, 1.26 mmol), 1-NA (0.372 g, 2.16 mmol), AgNO3 (0.418 g, 2.47 mmol), 4,4’-bpy (0.184 g, 1.18 mmol) were mixed and dissolved in acetonitrile (10 mL), then one drop Ti(OiPr)4 were added. The resultant solution was heated at 80 oC for seven days. After cooling to room temperature, yellow strip crystals of **AlOC-148** were obtained (maximum yield: ~10% for **AlOC-148** based on Al(OiPr)3).

**Solvothermal synthesis of AlOC-149.** Al(OiPr)3 (0.248 g, 1.22 mmol), 1-NA (0.367 g, 2.13 mmol), CuBr (0.163 g, 1.14 mmol), 4,4’-bpy (0.152 g, 0.97 mmol), TBAB (0.252 g, 0.78 mmol) were mixed and dissolved in acetonitrile (10 mL), then one drop Ti(OiPr)4 were added. The resultant solution was heated at 80 oC for seven days. After cooling to room temperature, green parallelogram crystals of **AlOC-149** were obtained (maximum yield: ~15% for **AlOC-149** based on Al(OiPr)3).

**Interaction energy decomposition analysis (EDA)**. The interaction energy between Ag(bpy)2+ thread and Al8 macrocycle was calculated on Xiamen Atomistic Computing Suite (XACS).3, 4

1. **A summary of reported macrocycles used for constructing rotaxanes**

**Table S1.** A summary of reported macrocycles used for constructing rotaxanes.

| **Macrocycle types** | **Early representative structure** | **Early Reporting year** | **Reported group** | **Reference** |
| --- | --- | --- | --- | --- |
| alkyl macrocycle | 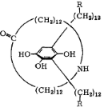 | 1967 | Zollenkopf | 5 |
| poly(ethylene glycol)  /crown ether macrocycle | 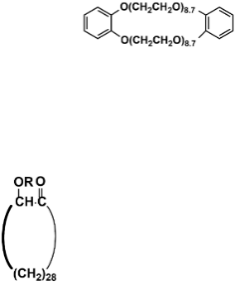 | 1976 | Zilkha | 6 |
| cyclodextrin | 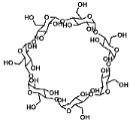 | 1981 | Ogino | 7 |
| cyclobis(paraquat-*p*-phenylene) | 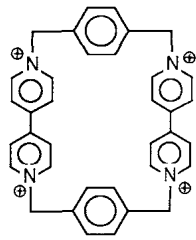 | 1991 | Stoddart | 8 |
| metal-binding macrocycle | 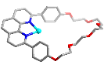 | 1991 | Gibson | 9 |
| amide based macrocycle | 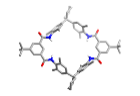 | 1995 | Lindoy | 10 |
| cucurbituril | 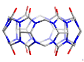 | 1996 | Kim | 11 |
| calixarene | 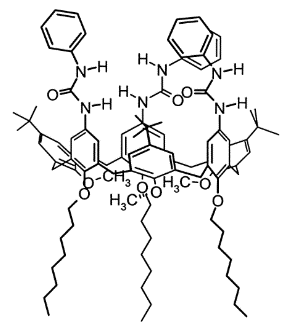 | 2000 | Pochini | 12 |
| coordination bonds  constructed macrocycles | 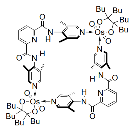 | 2001 | Jeong | 13 |
| heterometallic Cr7MF8 macrocycle | 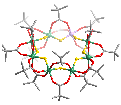 | 2003 | Winpenny | 14 |
| porphyrin-macrocycle | 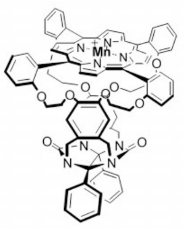 | 2003 | Nolte | 15 |
| 1,4,8,11-tetraazacyclotetradecane | 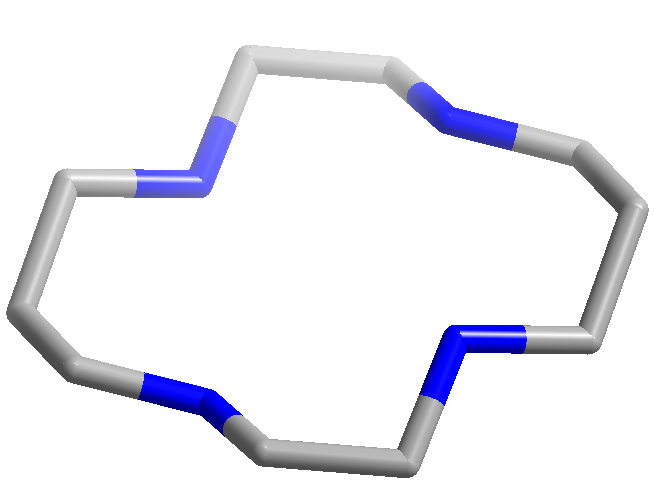 | 2004 | Suh | 16 |
| azacalix[8]pyridine | 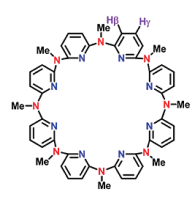 | 2011 | Wang | 17 |
| cyanostar | 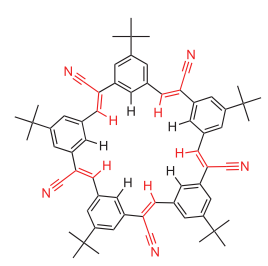 | 2013 | Flood | 18 |
| Inorganic Ti8 macrocycle | 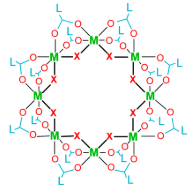 | 2021 | Wang | 19 |

1. **Crystallographic data and structure refinement parameters**

**Table S2.** Crystallographic data and structure refinement parameters for **AlOC-137** to **AlOC-140**.

|  | **AlOC-137** | **AlOC-138** | **AlOC-139** | **AlOC-140** |
| --- | --- | --- | --- | --- |
| Empirical formula | C182H129Al8N3O40 | C195H140Al8N4O42 | C202H142Al8N2O44 | C190H132Al8O44 |
| Formula weight | 3213.71 | 3426.94 | 3517.01 | 3334.79 |
| Temperature / K | 100.0(4) K | 144.97(12) K | 99.97(17) K | 99.98(14) K |
| Crystal system | monoclinic | orthorhombic | monoclinic | monoclinic |
| Space group | *P*2/c | *P*ccn | *P2/c* | *P2/n* |
| *a* [Å] | 31.0683(4) | 17.5033(4) | 17.6007(2) | 19.7430(12) |
| *b* [Å] | 18.4306(2) | 32.2577(9) | 16.1038(2) | 17.0738(7) |
| *c* [Å] | 29.0563(4) | 32.0754(7) | 71.1974(7) | 28.1234(15) |
| *α* [o] | 90 | 90 | 90 | 90 |
| *β* [o] | 109.842(2) | 90 | 95.1650(10) | 97.872(5) |
| *γ* [o] | 90 | 90 | 90 | 90 |
| *V* [Å3] | 15650.1(6) | 18110.3(8) | 20098.1(4) | 9390.7(9) |
| *Z* | 4 | 4 | 4 | 2 |
| *ρ*calcd [g cm-3] | 1.364 | 1.257 | 1.162 | 1.179 |
| *μ* [mm–1] | 0.769 | 0.692 | 0.635 | 0.66 |
| *F (000)* | 6664.0 | 7112 | 7296.0 | 3456 |
| Index ranges | ‒36 ≤ h ≤ 36  ‒21 ≤ k ≤ 14  ‒33 ≤ l ≤ 34 | ‒18 ≤ h ≤ 20  ‒36 ≤ k ≤ 37  ‒36 ≤ l ≤ 23 | ‒17 ≤ h ≤ 18  ‒17 ≤ k ≤ 17  ‒76 ≤ l ≤ 74 | ‒22 ≤ h ≤ 23  ‒20 ≤ k ≤ 19  ‒33 ≤ l ≤ 31 |
| Reflns collected | 71815 | 41721 | 94601 | 55202 |
| unique reflns [Rint] | 23220[0.0473] | 12882 [0.0585] | 26036 [0.0299] | 16204 [0.0317] |
| data/restraints/parameters | 23220/618/2269 | 12882/165/1112 | 26036/128/2278 | 16204/3094/888 |
| GOF on *F*2 | 1.793 | 1.288 | 1.019 | 1.360 |
| *R*1, w*R*2 [*I* > 2*σ*(*I*)] | 0.1315, 0.3821 | 0.1265, 0.3235 | 0.1012, 0.2780 | 0.1600, 0.3892 |
| *R*1, w*R*2 [all data] | 0.1522, 0.4113 | 0.1864, 0.3725 | 0.1120, 0.2881 | 0.2161, 0.4380 |
| Δ*ρ*min/Δ*ρ*max(e∙Å-3) | 1.29/‒0.67 | 0.73/-0.40 | 1.69/‒1.56 | 0.93/‒0.41 |
| CCDC number | 2322760 | 2322761 | 2322762 | 2322763 |

**Table S3.** Crystallographic data and structure refinement parameters for **AlOC-141** to **AlOC-144**.

|  | **AlOC-141** | **AlOC-142** | **AlOC-143** | **AlOC-144** |
| --- | --- | --- | --- | --- |
| Empirical formula | C196H136Al8N4O40 | C196H136AgAl8N5O43 | C202H140Ag2Al8N2O44 | C190H131AgAl8O44 |
| Formula weight | 3402.92 | 3572.80 | 3730.73 | 3441.65 |
| Temperature / K | 149.99(10) K | 293(2) K | 293(2) K | 293(2) K |
| Crystal system | monoclinic | monoclinic | tetragonal | monoclinic |
| Space group | *P*2/n | *C2/c* | *I*-42d | *I*2/a |
| *a* [Å] | 17.3233(3) | 17.0671(3) | 24.65680(10) | 33.7018(13) |
| *b* [Å] | 18.6619(4) | 43.9438(7) | 24.65680(10) | 17.0426(3) |
| *c* [Å] | 24.7441(3) | 23.5220(4) | 57.5237(4) | 33.1000(9) |
| *α* [o] | 90 | 90 | 90 | 90 |
| *Β* [o] | 94.4820(10) | 105.350(2) | 90 | 116.568(4) |
| *γ* [o] | 90 | 90 | 90 | 90 |
| *V* [Å3] | 7975.0(2) | 17012.0(5) | 34972.0(4) | 17004.0(10) |
| *Z* | 2 | 4 | 8 | 4 |
| *ρ*calcd [g cm-3] | 1.417 | 1.395 | 1.417 | 1.344 |
| *μ* [mm–1] | 0.777 | 1.346 | 1.923 | 1.330 |
| *F (000)* | 3528.0 | 7368.0 | 15328.0 | 7096.0 |
| Index ranges | ‒17 ≤ h ≤ 17  ‒19 ≤ k ≤ 16  ‒25 ≤ l ≤ 25 | ‒18 ≤ h ≤ 18  ‒47 ≤ k ≤ 46  ‒25 ≤ l ≤ 25 | ‒19 ≤ h ≤ 30  ‒29 ≤ k ≤ 30  ‒67 ≤ l ≤ 71 | ‒38 ≤ h ≤ 39  ‒19 ≤ k ≤ 10  ‒38 ≤ l ≤ 38 |
| Reflections collected | 31454 | 53194 | 57197 | 51406 |
| Independent reflections [Rint] | 8867 [0.0225] | 10126 [0.0343] | 17416 [0.0206] | 13605 [0.0341] |
| data/restraints/parameters | 8867/414/1252 | 10126/87/1126 | 17416/126/1145 | 13605/424/1079 |
| GOF on *F*2 | 1.835 | 1.189 | 1.025 | 1.404 |
| *R*1, w*R*2 [*I* > 2*σ*(*I*)] | 0.1397, 0.3996 | 0.0898, 0.2524 | 0.0686, 0.2000 | 0.1065, 0.3223 |
| *R*1, w*R*2 [all data] | 0.1621, 0.4209 | 0.1006, 0.2675 | 0.0722, 0.2059 | 0.1230, 0.3434 |
| Δ*ρ*min/Δ*ρ*max (e∙Å-3) | 1.84/‒0.63 | 0.86/‒1.46 | 0.59/‒1.51 | 0.90/‒0.61 |
| CCDC number | 2322764 | 2322765 | 2322766 | 2322767 |

**Table S4.** Crystallographic data and structure refinement parameters for **AlOC-145** to **AlOC-147**.

|  | **AlOC-145** | **AlOC-146** | **AlOC-147** |
| --- | --- | --- | --- |
| Empirical formula | C211H141AgAl8N2NaO50S2 | C190H134AgAl8N5O43 | C197H135AgAl8N2O42 |
| Formula weight | 3915.07 | 3498.72 | 3525.77 |
| Temperature / K | 293(2) K | 293(2) | 293(2) K |
| Crystal system | triclinic | triclinic | monoclinic |
| Space group | *P-*1 | *P*-1 | *Cc* |
| *a* [Å] | 19.3196(8) | 20.20900(10) | 33.4626(18) |
| *b* [Å] | 19.7123(8) | 21.16690(10) | 26.0205(15) |
| *c* [Å] | 27.1042(5) | 22.5720(2) | 22.4279(8) |
| *α* [o] | 85.287(2) | 90.8290(10) | 90 |
| *Β* [o] | 87.002(2) | 115.3670(10) | 101.795(5) |
| *γ* [o] | 64.714(4) | 96.9510(10) | 90 |
| *V* [Å3] | 9299.9(6) | 8636.65(12) | 19115.9(17) |
| *Z* | 2 | 2 | 4 |
| *ρ*calcd [g cm-3] | 1.398 | 1.345 | 1.225 |
| *μ* [mm–1] | 2.186 | 1.318 | 1.202 |
| *F (000)* | 4030.0 | 3608.0 | 7272.0 |
| Index ranges | ‒22 ≤ h ≤ 16  ‒21 ≤ k ≤ 23  ‒33 ≤ l ≤ 33 | ‒23 ≤ h ≤ 23  ‒24 ≤ k ≤ 21  ‒26 ≤ l ≤ 26 | ‒36 ≤ h ≤ 40  ‒28 ≤ k ≤ 30  ‒26 ≤ l ≤ 24 |
| Reflections collected | 52510 | 100811 | 24054 |
| Independent reflections [Rint] | 24882 [0.0641] | 28417 [0.0222] | 13599 [0.2452] |
| data/restraints/parameters | 24882/275/2660 | 28417/0/2225 | 13599/1973/1830 |
| GOF on *F*2 | 1.441 | 1.058 | 1.665 |
| *R*1, w*R*2 [*I* > 2*σ*(*I*)] | 0.1036, 0.3208 | 0.0460, 0.1411 | 0.1739, 0.3878 |
| *R*1, w*R*2 [all data] | 0.1157, 0.3482 | 0.0543, 0.1480 | 0.3389, 0.4852 |
| Δ*ρ*min/Δ*ρ*max (e∙Å-3) | 0.82/‒1.61 | 1.59/-1.07 | 1.67/‒1.89 |
| CCDC number | 2322768 | 2322769 | 2322770 |

**Table S5.** Crystallographic data and structure refinement parameters for **AlOC-148** and **AlOC-149**.

|  | **AlOC-148** | **AlOC-149** | **AlOC-142-H** |
| --- | --- | --- | --- |
| Empirical formula | C196H136Ag2Al8N6O46 | C244H170Al8BrCu3N6O48 | C196H136AgAl8N5O43 |
| Formula weight | 3742.68 | 4440.22 | 3572.80 |
| Temperature / K | 293(2) | 293(2) | 293(2) |
| Crystal system | tetragonal | monoclinic | monoclinic |
| Space group | *P*-4n2 | *C*2/c | *C2/c* |
| *a* [Å] | 31.4705(4) | 22.7481(9) | 16.9017(3) |
| *b* [Å] | 31.4705(4) | 20.8568(6) | 43.9044(5) |
| *c* [Å] | 17.6581(6) | 46.1178(12) | 23.5810(4) |
| *α* [o] | 90 | 90 | 90 |
| *Β* [o] | 90 | 102.434(3) | 104.847(2) |
| *γ* [o] | 90 | 90 | 90 |
| *V* [Å3] | 17488.5(7) | 21367.5(12) | 16914.3(5) |
| *Z* | 4 | 4 | 4 |
| *ρ*calcd [g cm-3] | 1.421 | 1.380 | 1.403 |
| *μ* [mm–1] | 2.902 | 2.388 | 2.072 |
| *F (000)* | 7680.0 | 9144 | 7368.0 |
| Index ranges | ‒33 ≤ h ≤ 25  ‒32 ≤ k ≤ 33  ‒18 ≤ l ≤ 18 | ‒23 ≤ h ≤ 23  ‒19 ≤ k ≤ 21  ‒46 ≤ l ≤ 48 | ‒20 ≤ h ≤ 20  ‒52 ≤ k ≤ 52  ‒23 ≤ l ≤ 28 |
| Reflections collected | 43486 | 37772 | 46664 |
| Independent reflections [Rint] | 10440 [0.0358] | 12656 [0.0489] | 13945 [0.0614] |
| data/restraints/parameters | 10440/1187/1051 | 12656/81/1374 | 13945/27/1105 |
| GOF on *F*2 | 1.548 | 1.065 | 1.646 |
| *R*1, w*R*2 [*I* > 2*σ*(*I*)] | 0.1394, 0.3514 | 0.0654, 0.1847 | 0.1262, 0.3691 |
| *R*1, w*R*2 [all data] | 0.1627, 0.3767 | 0.0862, 0.1972 | 0.1397, 0.3900 |
| Δ*ρ*min/Δ*ρ*max (e∙Å-3) | 1.26/-0.56 | 0.72/‒0.52 | 1.34/-1.12 |
| CCDC number | 2322771 | 2322772 | 2326287 |

1. **Structure description for Al8 macrocycle**


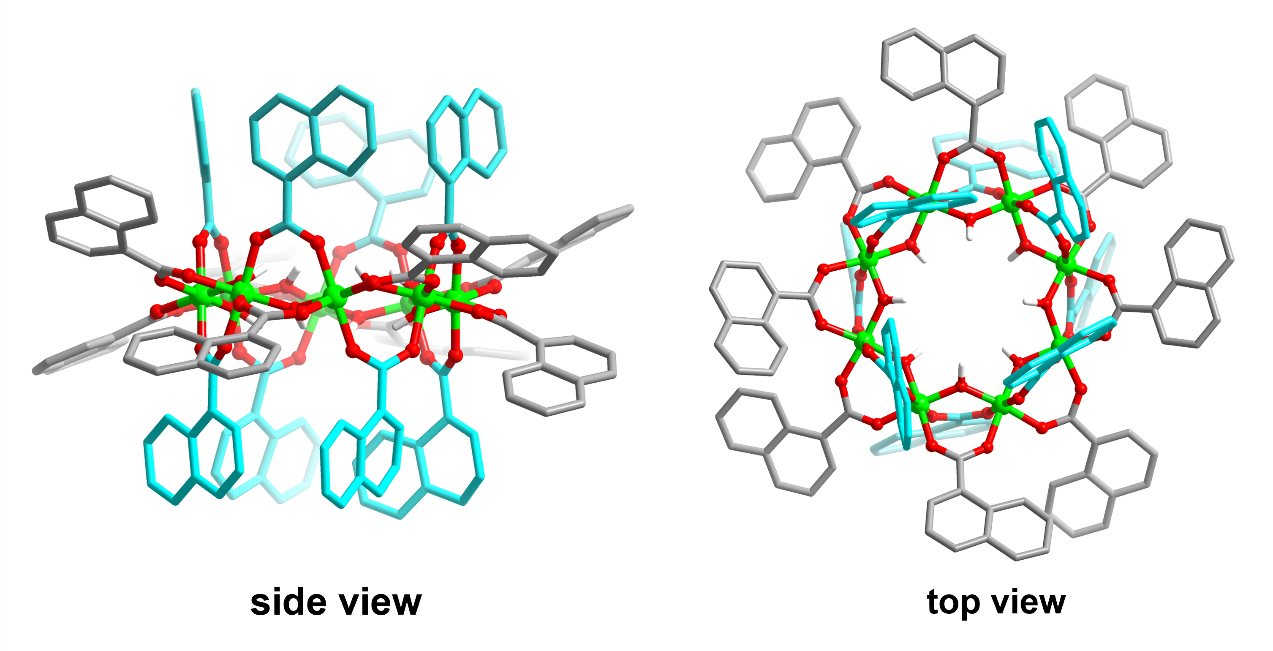


**Figure S1.** The side and top view of Al8 macrocycle. Color code: Al, green; O, red; C, grey; H, white.


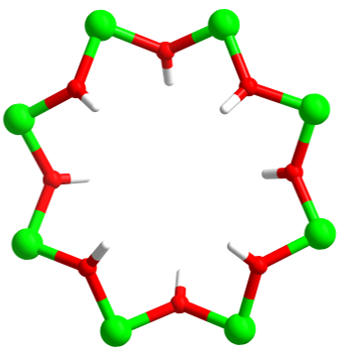


**Figure S2.** The distribution of –OH groups on Al8 macrocycle. Color code: Al, green; O, red; H, white.


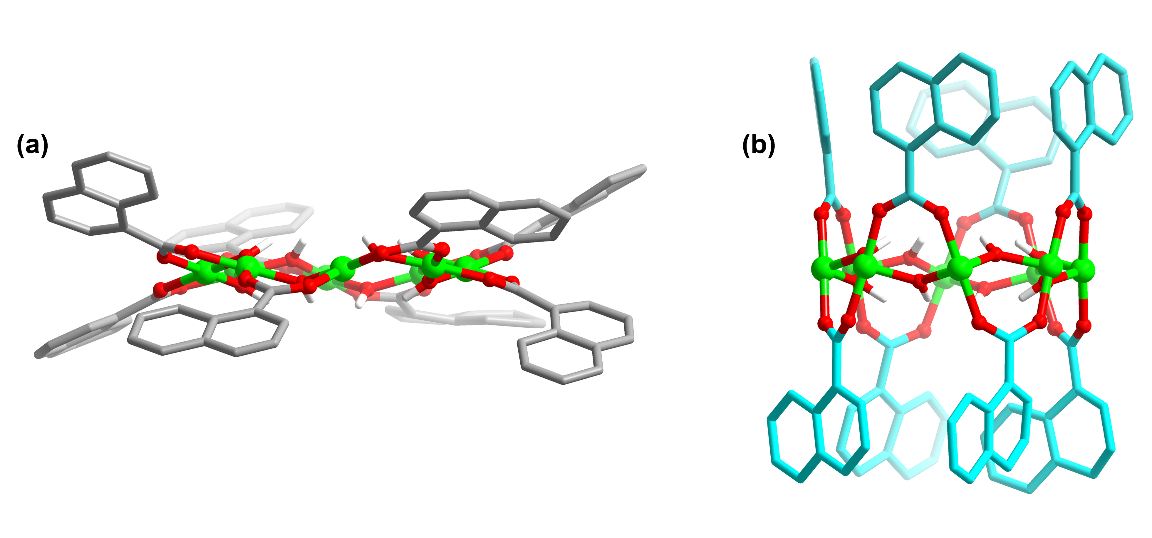


**Figure S3.** The distribution of two kinds of NA ligands. (a) Sixteen of them are located on the equator of Al8 macrocycle. Color code: Al, green; O, red; C, grey; H, white; (b) Eight of them are almost perpendicular to Al8 macrocycle. Color code: Al, green; O, red; C, turquoise; H, white.


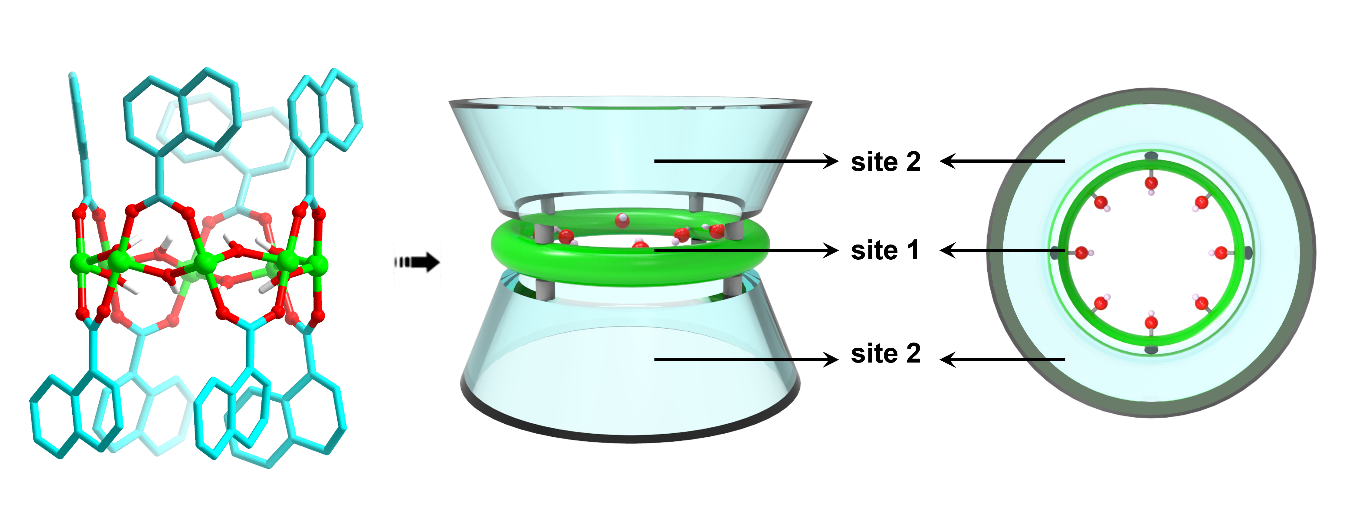


**Figure S4.** The tubular cavity in Al8 macrocycle. Color code: Al, green; O, red; C, turquoise; H, white.

1. **BVS analysis for AlOC-137 to AlOC-149**

**Table S6**. BVS analysis for **AlOC-137**.

| Al1 3.247  Al1―O1 1.853(3)  Al1―O3 1.847(3)  Al1―O4 1.894(3)  Al1―O5 1.900(4)  Al1―O7 1.877(3)  Al1―O8 1.900(4) | Al2 3.218  Al2―O2 1.897(4)  Al2―O6 1.854(3)  Al2―O9 1.892(4)  Al2―O11 1.852(4)  Al2―O13 1.907(4)  Al2―O25 1.888(4) | Al3 3.220  Al3―O3 1.867(4)  Al3―O6 1.838(4)  Al3―O12 1.908(4)  Al3―O16 1.892(4)  Al3―O18 1.902(4)  Al3―O24 1.883(4) | Al4 3.227  Al4―O1 1.853(4)  Al4―O19 1.848(4)  Al4―O20 1.892(4)  Al4―O23 1.890(4)  Al4―O26 1.886(4)  Al4―O33 1.916(5) |
| --- | --- | --- | --- |
| Al5 3.196  Al5―O14 1.853(4)  Al5―O15 1.899(4)  Al5―O17 1.851(5)  Al5―O29 1.894(6)  Al5―O34 1.891(5)  Al5―O36 1.918(5) | Al6 3.239  Al6―O10 1.832(5)  Al6―O17 1.844(5)  Al6―O21 1.902(4)  Al6―O31 1.897(7)  Al6―O35 1.918(5)  Al6―O37 1.866(7) | Al7 3.283  Al7―O10 1.832(5)  Al7―O11 1.844(5)  Al7―O27 1.902(4)  Al7―O28 1.897(7)  Al7―O30 1.918(5)  Al7―O32 1.886(7) | Al8 3.159  Al8―O14 1.851(4)  Al8―O19 1.847(4)  Al8―O22 1.897(6)  Al8―O38 1.921(6)  Al8―O39 1.907(5)  Al8―O40 1.911(7) |
| O1 1.157  Al1―O1 1.853(3)  Al4―O1 1.853(4) | O3 1.145  Al1―O3 1.847(3)  Al3―O3 1.867(4) | O6 1.180  Al2―O6 1.854(3)  Al3―O6 1.838(4) | O10 1.180  Al6―O10 1.832(5)  Al7―O10 1.832(5) |
| O11 1.180  Al2―O11 1.852(4)  Al7―O11 1.844(5) | O14 1.160  Al5―O14 1.853(4)  Al8―O14 1.851(4) | O17 1.174  Al5―O17 1.851(5)  Al6―O17 1.844(5) | O19 1.175  Al4―O19 1.848(4)  Al8―O19 1.847(4) |

**Table S7**. BVS analysis for **AlOC-138**.

| Al1 3.210  Al1―O1 1.831(4)  Al1―O3 1.851(5)  Al1―O5 1.880(5)  Al1―O6 1.894(5)  Al1―O9 1.925(5)  Al1―O12 1.920(5) | Al2 3.157  Al2―O1 1.844(5)  Al2―O2 1.843(5)  Al2―O13 1.919(5)  Al2―O14 1.913(5)  Al2―O15 1.910(6)  Al2―O16 1.908(5) | Al3 3.157  Al3―O3 1.834(5)  Al3―O4 1.922(5)  Al3―O7 1.826(4)  Al3―O8 1.910(5)  Al3―O10 1.926(5)  Al3―O11 1.926(5) | Al4 3.213  Al4―O2 1.839(5)  Al4―O7 1.833(4)  Al4―O17 1.891(6)  Al4―O18 1.904(6)  Al4―O19 1.898(5)  Al4―O20 1.935(6) |
| --- | --- | --- | --- |
| O1 1.207  Al1―O1 1.945(4)  Al2―O1 1.844(5) | O2 1.195  Al2―O2 1.843(5)  Al4―O2 1.839(5) | O3 1.191  Al1―O3 1.851(5)  Al3―O3 1.834(5) | O7 1.233  Al3―O7 1.826(4)  Al4―O7 1.833(4) |

**Table S8**. BVS analysis for **AlOC-139**.

| Al1 3.180  Al1―O1 1.842(3)  Al1―O6 1.893(4)  Al1―O11 1.839(3)  Al1―O13 1.917(4)  Al1―O15 1.905(4)  Al1―O19 1.927(4) | Al2 3.183  Al2―O4 1.915(4)  Al2―O7 1.832(4)  Al2―O9 1.844(4)  Al2―O17 1.907(4)  Al2―O24 1.903(4)  Al2―O25 1.920(4) | Al3 3.213  Al3―O5 1.835(3)  Al3―O8 1.907(4)  Al3―O12 1.846(3)  Al3―O36 1.911(4)  Al3―O41 1.901(4)  Al3―O42 1.898(4) | Al4 3.202  Al4―O5 1.836(3)  Al4―O11 1.853(3)  Al4―O20 1.895(4)  Al4―O27 1.896(4)  Al4―O31 1.918(4)  Al4―O38 1.907(4) |
| --- | --- | --- | --- |
| Al5 3.244  Al5―O2 1.836(4)  Al5―O9 1.820(4)  Al5―O29 1.917(4)  Al5―O30 1.914(4)  Al5―O33 1.906(4)  Al5―O37 1.888(4) | Al6 3.152  Al6―O2 1.847(4)  Al6―O14 1.910(4)  Al6―O22 1.826(4)  Al6―O23 1.919(4)  Al6―O32 1.913(4)  Al6―O35 1.931(4) | Al7 3.183  Al7―O1 1.852(3)  Al7―O3 1.896(4)  Al7―O7 1.834(3)  Al7―O10 1.907(4)  Al7―O18 1.911(4)  Al7―O34 1.920(4) | Al8 3.140  Al8―O12 1.832(4)  Al8―O16 1.914(4)  Al8―O21 1.930(4)  Al8―O22 1.849(4)  Al8―O26 1.923(4)  Al8―O39 1.905(4) |
| O1 1.177  Al1―O1 1.842(3)  Al7―O1 1.852(3) | O2 1.194  Al5―O2 1.836(4)  Al6―O2 1.847(4) | O5 1.214  Al2―O5 1.832(4)  Al3―O5 1.835(3) | O7 1.222  Al2―O7 1.832(4)  Al7―O7 1.834(3) |
| O9 1.226  Al2―O9 1.844(4)  Al5―O9 1.820(4) | O11 1.180  Al1―O11 1.839(3)  Al4―O11 1.853(3) | O12 1.202  Al3―O12 1.846(3)  Al8―O12 1.832(4) | O22 1.207  Al6―O22 1.826(4)  Al8―O22 1.849(4) |

**Table S9**. BVS analysis for **AlOC-140**.

| Al1 3.262  Al1―O1 1.827(4)  Al1―O1 1.827(4)  Al1―O4 1.920(5)  Al1―O4 1.920(5)  Al1―O7 1.887(5)  Al1―O7 1.887(5) | Al2 3.191  Al2―O2 1.822(4)  Al2―O3 1.834(4)  Al2―O6 1.920(5)  Al2―O8 1.886(4)  Al2―O13 1.920(5)  Al2―O16 1.939(6) | Al3 3.188  Al3―O1 1.834(4)  Al3―O2 1.844(4)  Al3―O5 1.925(5)  Al3―O9 1.910(6)  Al3―O12 1.906(4)  Al3―O14 1.898(5) | Al4 3.277  Al4―O3 1.841(4)  Al4―O10 1.832(5)  Al4―O11 1.890(4)  Al4―O15 1.867(5)  Al4―O18 1.915(6)  Al4―O19 1.909(6) | Al5 3.327  Al5―O10 1.839(4)  Al5―O10 1.839(4)  Al5―O17 1.876(8)  Al5―O17 1.876(8)  Al5―O20 1.893(5)  Al5―O20 1.893(5) |
| --- | --- | --- | --- | --- |
| O1 1.230  Al1―O1 1.827(4)  Al3―O1 1.834(4) | O2 1.222  Al2―O2 1.822(4)  Al3―O2 1.844(4) | O3 1.207  Al2―O3 1.834(4)  Al4―O3 1.841(4) | O10 1.213  Al4―O10 1.832(5)  Al5―O10 1.839(4) |  |

**Table S10**. BVS analysis for **AlOC-141**.

| Al1 3.092  Al1―O1 1.819(5)  Al1―O2 1.835(6)  Al1―O8 1.926(8)  Al1―O9 1.939(6)  Al1―O10 1.940(7)  Al1―O12 1.937(6) | Al2 3.097  Al2―O2 1.828(5)  Al2―O5 1.958(8)  Al2―O6 1.843(7)  Al2―O7 1.913(6)  Al2―O11 1.928(6)  Al2―O14 1.918(7) | Al3 2.993  Al3―O6 1.806(6)  Al3―O13 2.083(1)  Al3―O15 1.817(8)  Al3―O16 1.918(8)  Al3―O17 1.961(7)  Al3―O19 1.929(1) | Al4 2.877  Al4―O15 1.808(8)  Al4―O15 1.808(8)  Al4―O18 1.961(9)  Al4―O18 1.961(9)  Al4―O20 2.035(14)  Al4―O20 2.035(14) | Al5 3.058  Al5―O1 1.843(5)  Al5―O1 1.843(5)  Al5―O3 1.922(5)  Al5―O3 1.922(5)  Al5―O4 1.942(6)  Al5―O4 1.942(6) |
| --- | --- | --- | --- | --- |
| O1 1.229  Al1―O1 1.819(5)  Al5―O1 1.843(5) | O2 1.226  Al1―O2 1.835(6)  Al2―O2 1.828(5) | O6 1.251  Al2―O6 1.843(7)  Al3―O6 1.806(6) | O15 1.290  Al3―O15 1.817(8)  Al4―O15 1.808(8) |  |

**Table S11**. BVS analysis for **AlOC-142**.

| Al1 2.931  Al1―O2 1.813(3)  Al1―O4 1.798(3)  Al1―O7 1.981(3)  Al1―O11 1.988(3)  Al1―O12 2.001(3)  Al1―O13 1.976(4) | Al2 2.945  Al2―O3 1.805(3)  Al2―O4 1.835(3)  Al2―O5 1.960(3)  Al2―O9 1.955(3)  Al2―O10 1.974(3)  Al2―O15 2.001(4) | Al3 2.894  Al3―O1 1.799(3)  Al3―O2 1.834(3)  Al3―O6 1.943(4)  Al3―O16 2.016(3)  Al3―O18 1.947(4)  Al3―O20 2.050(4) | Al4 2.888  Al4―O1 1.825(3)  Al4―O3 1.794(3)  Al4―O8 1.977(4)  Al4―O14 1.986(5)  Al4―O17 2.023(4)  Al4―O19 1.988(4) | Ag1 0.851  Ag1―N1 1.958(5)  Ag1―N2 2.064(3) |
| --- | --- | --- | --- | --- |
| O1 1.294  Al3―O1 1.799(3)  Al4―O1 1.825(3) | O2 1.254  Al1―O2 1.813(3)  Al3―O2 1.834(3) | O3 1.338  Al2―O3 1.805(3)  Al4―O3 1.794(3) | O4 1.279  Al1―O4 1.798(3)  Al2―O4 1.835(3) |  |

**Table S12**. BVS analysis for **AlOC-143**.

| Al1 3.242  Al1―O2 1.818(4)  Al1―O10 1.885(4)  Al1―O16 1.864(3)  Al1―O30 1.894(5)  Al1―O36 1.900(4)  Al1―O38 1.918(4) | Al2 3.145  Al2―O6 1.906(4)  Al2―O14 1.854(3)  Al2―O16 1.847(4)  Al2―O24 1.916(4)  Al2―O26 1.924(4)  Al2―O28 1.898(4) | Al3 3.230  Al3―O4 1.920(4)  Al3―O14 1.846(3)  Al3―O18 1.899(4)  Al3―O20 1.830(4)  Al3―O22 1.895(4)  Al3―O32 1.897(4) | Al4 3.185  Al4―O2 1.843(3)  Al4―O2 1.843(3)  Al4―O8 1.900(4)  Al4―O8 1.900(4)  Al4―O40 1.916(4)  Al4―O40 1.916(4) | Al5 3.256  Al5―O12 1.878(4)  Al5―O12 1.878(4)  Al5―O20 1.837(3)  Al5―O20 1.838(3)  Al5―O34 1.920(4)  Al5―O34 1.920(4) | Ag1 0.662  Ag1―N2 2.259(11)  Ag1―N2 2.259(11) |
| --- | --- | --- | --- | --- | --- |
| Ag2 1.070  Ag2―O42 2.419(6)  Ag2―O42 2.419(6)  Ag2―O44 2.257(9)  Ag2―O44 2.257(9) | O2 1.230  Al1―O2 1.818(4)  Al4―O2 1.843(3) | O14 1.167  Al2―O14 1.854(3)  Al3―O14 1.846(3) | O16 1.150  Al1―O16 1.864(3)  Al2―O16 1.847(4) | O20 1.220  Al3―O20 1.830(4)  Al5―O20 1.837(3) |  |

**Table S13**. BVS analysis for **AlOC-144**.

| Al1 3.232  Al1―O4 1.896(2)  Al1―O4 1.896(2)  Al1―O6 1.896(2)  Al1―O6 1.886(3)  Al1―O7 1.886(3)  Al1―O7 1.886(3) | Al2 3.139  Al2―O1 1.896(2)  Al2―O3 1.896(2)  Al2―O8 1.896(2)  Al2―O15 1.886(3)  Al2―O16 1.886(3)  Al2―O18 1.886(3) | Al3 3.181  Al3―O1 1.895(3)  Al3―O2 1.895(3)  Al3―O7 1.895(3)  Al3―O10 1.892(3)  Al3―O12 1.892(3)  Al3―O14 1.892(3) | Al4 3.191  Al4―O3 1.896(2)  Al4―O5 1.896(2)  Al4―O9 1.896(2)  Al4―O17 1.886(3)  Al4―O19 1.886(3)  Al4―O20 1.886(3) | Al5 3.201  Al5―O5 1.896(2)  Al5―O5 1.896(2)  Al5―O11 1.896(2)  Al5―O11 1.886(3)  Al5―O13 1.886(3)  Al5―O13 1.886(3) |
| --- | --- | --- | --- | --- |
| Ag1 0.955  Ag1―O21 2.342(6)  Ag1―O21 2.342(6)  Ag1―O22 2.403(5)  Ag1―O22 2.403(5) | O1 1.183  Al2―O1 1.896(2)  Al3―O1 1.895(3) | O3 1.189  Al2―O3 1.896(2)  Al4―O3 1.896(2) | O5 1.189  Al4―O5 1.896(2)  Al5―O5 1.896(2) | O7 1.172  Al1―O7 1.886(3)  Al3―O7 1.895(3) |

**Table S14**. BVS analysis for **AlOC-145**.

| Al1 3.150  Al1―O2 1.873(3)  Al1―O4 1.888(4)  Al1―O5 1.866(4)  Al1―O10 1.909(4)  Al1―O13 1.875(4)  Al1―O20 1.927(5) | Al2 3.125  Al2―O3 1.898(4)  Al2―O5 1.852(4)  Al2―O6 1.848(3)  Al2―O14 1.951(4)  Al2―O24 1.925(4)  Al2―O32 1.889(4) | Al3 3.145  Al3―O1 1.831(4)  Al3―O7 1.837(3)  Al3―O8 1.912(4)  Al3―O21 1.915(5)  Al3―O22 1.925(5)  Al3―O27 1.932(3) | Al4 3.120  Al4―O1 1.832(4)  Al4―O12 1.839(4)  Al4―O19 1.898(4)  Al4―O29 1.927(4)  Al4―O34 1.952(4)  Al4―O41 1.924(5) | Al5 3.169  Al5―O6 1.823(4)  Al5―O9 1.828(3)  Al5―O30 1.930(4)  Al5―O33 1.916(5)  Al5―O35 1.914(4)  Al5―O37 1.927(4) |
| --- | --- | --- | --- | --- |
| Al6 3.120  Al6―O7 1.838(4)  Al6―O9 1.838(3)  Al6―O11 1.907(4)  Al6―O15 1.924(4)  Al6―O18 1.943(4)  Al6―O23 1.920(4) | Al7 3.127  Al7―O12 1.835(4)  Al7―O16 1.867(3)  Al7―O25 1.888(4)  Al7―O26 1.908(4)  Al7―O39 1.935(5)  Al7―O40 1.927(4) | Al8 3.155  Al8―O2 1.854(4)  Al8―O16 1.871(3)  Al8―O17 1.895(4)  Al8―O28 1.908(4)  Al8―O31 1.904(4)  Al8―O36 1.902(4) | Ag1 0.962  Ag1―N1 2.176(9)  Ag1―N2 2.072(1) | Na1 0.902  Na1―O42 2.419(6)  Na1―O44 2.687(6)  Na1―O45 2.358(7)  Na1―O16 2.603  Na1―O2 2.375  Na1―O5 2.784 |
| O1 1.227  Al3―O1 1.831(4)  Al4―O1 1.832(4) | O2 1.339  Al1―O2 1.873(3)  Al8―O2 1.854(4)  Na1―O2 2.375 | O5 1.209  Al1―O5 1.866(4)  Al2―O5 1.852(4)  Na1―O5 2.784 | O6 1.214  Al2―O6 1.848(3)  Al5―O6 1.823(4) | O7 1.207  Al3―O7 1.837(3)  Al6―O7 1.838(4) |
| O9 1.222  Al5―O9 1.828(3)  Al6―O9 1.838(3) | O12 1.215  Al4―O12 1.839(4)  Al7―O12 1.835(4) | O16 1.224  Al7―O16 1.867(3)  Al8―O16 1.871(3)  Na1―O16 2.603 |  |  |

**Table S15**. BVS analysis for **AlOC-146**.

| Al1 3.200  Al1―O3 1.8987(16)  Al1―O4 1.9092(16)  Al1―O8 1.9059(15)  Al1―O10 1.8449(15)  Al1―O13 1.8315(15)  Al1―O17 1.9215(16) | Al2 3.135  Al2―O2 1.8489(16)  Al2―O6 1.8447(15)  Al2―O11 1.9230(16)  Al2―O16 1.8956(16)  Al2―O18 1.9200(15)  Al2―O24 1.9242(15) | Al3 3.164  Al3―O6 1.8411(15)  Al3―O12 1.9099(16)  Al3―O13 1.8470(15)  Al3―O14 1.9068(16)  Al3―O21 1.9104(16)  Al3―O38 1.9197(16) | Al4 3.184  Al4―O2 1.8483(15)  Al4―O9 1.8429(16)  Al4―O15 1.8948(16)  Al4―O20 1.9243(17)  Al4―O29 1.9053(17)  Al4―O32 1.9045(16) | Al5 3.214  Al5―O1 1.8484(16)  Al5―O10 1.8407(15)  Al5―O22 1.9113(17)  Al5―O23 1.8993(17)  Al5―O28 1.9059(16)  Al5―O35 1.8928(17) |
| --- | --- | --- | --- | --- |
| Al6 3.159  Al6―O5 1.8400(16)  Al6―O9 1.8480(15)  Al6―O27 1.9063(17)  Al6―O30 1.9205(17)  Al6―O34 1.9003(17)  Al6―O40 1.9238(17) | Al7 3.143  Al7―O5 1.8439(16)  Al7―O7 1.8605(16)  Al7―O19 1.9123(17)  Al7―O25 1.9096(16)  Al7―O26 1.9131(17)  Al7―O37 1.9084(17) | Al8 3.161  Al8―O1 1.8379(15)  Al8―O7 1.8450(16)  Al8―O31 1.9321(17)  Al8―O33 1.9094(18)  Al8―O36 1.8845(17)  Al8―O39 1.9316(18) | Ag1 0.990  Ag1―N2 2.133(3)  Ag1―N4 2.088(3) | O1 1.190  Al5―O1 1.8484(16)  Al8―O1 1.8379(15) |
| O2 1.172  Al2―O2 1.8489(16)  Al4―O2 1.8483(15) | O5 1.194  Al6―O5 1.8400(16)  Al7―O5 1.8439(16) | O6 1.191  Al2―O6 1.8447(15)  Al3―O6 1.8411(15) | O7 1.160  Al7―O7 1.8605(16)  Al8―O7 1.8450(16) | O9 1.182  Al6―O9 1.8480(15)  Al4―O9 1.8429(16) |
| O10 1.191  Al1―O10 1.8449(15)  Al5―O10 1.8407(15) | O13 1.203  Al1―O13 1.8315(15)  Al3―O13 1.8470(15) |  |  |  |

**Table S16**. BVS analysis for **AlOC-147**.

| Al1 2.646  Al1―O3 1.95(3)  Al1―O10 2.00(3)  Al1―O11 1.90(3)  Al1―O17 1.99(4)  Al1―O31 1.85(3)  Al1―O36 2.05(4) | Al2 2.912  Al2―O7 1.80(3)  Al2―O16 1.91(3)  Al2―O20 1.87(2)  Al2―O28 2.02(3)  Al2―O32 1.95(2)  Al2―O39 1.99(3) | Al3 3.215  Al3―O10 1.71(3)  Al3―O12 1.92(3)  Al3―O15 1.82(3)  Al3―O27 2.00(3)  Al3―O29 1.93(3)  Al3―O33 1.98(2) | Al4 3.498  Al4―O6 1.822(19)  Al4―O8 1.89(3)  Al4―O14 1.77(3)  Al4―O16 1.82(3)  Al4―O18 1.89(3)  Al4―O38 1.92(2) | Al5 3.107  Al5―O5 2.03(3)  Al5―O7 1.86(3)  Al5―O9 1.86(2)  Al5―O13 1.964(19)  Al5―O21 1.78(3)  Al5―O37 1.91(3) |
| --- | --- | --- | --- | --- |
| Al6 3.535  Al6―O4 1.68(3)  Al6―O19 1.92(2)  Al6―O23 1.89(2)  Al6―O26 1.90(4)  Al6―O31 1.86(3)  Al6―O34 1.87(4) | Al7 3.493  Al7―O2 1.79(3)  Al7―O4 1.97(3)  Al7―O18 1.79(3)  Al7―O22 1.84(2)  Al7―O30 1.84(4)  Al7―O35 1.89(2) | Al8 3.218  Al8―O1 1.92(4)  Al8―O15 1.76(3)  Al8―O21 1.99(3)  Al8―O24 1.94(2)  Al8―O25 1.93(2)  Al8―O42 1.79(3) | Ag1 0.814  Ag1―N1 2.14(9)  Ag1―N2 2.219(17) | O4 1.336  Al6―O4 1.68(3)  Al7―O4 1.97(3) |
| O7 1.227  Al2―O7 1.80(3)  Al5―O7 1.86(3) | O10 1.232  Al1―O10 2.00(3)  Al3―O10 1.71(3) | O15 1.367  Al3―O15 1.82(3)  Al8―O15 1.76(3) | O16 1.121  Al2―O16 1.91(3)  Al4―O16 1.82(3) | O18 1.201  Al4―O18 1.89(3)  Al7―O18 1.79(3) |
| O21 1.097  Al5―O21 1.78(3)  Al8―O21 1.99(3) | O31 1.143  Al1―O31 1.85(3)  Al6―O31 1.86(3) |  |  |  |

**Table S17**. BVS analysis for **AlOC-148**.

| Al1 2.895  Al1―O2 1.786(13)  Al1―O3 1.958(14)  Al1―O7 2.026(13)  Al1―O9 2.008(14)  Al1―O11 1.833(10)  Al1―O17 1.981(15) | Al2 3.020  Al2―O1 1.937(13)  Al2―O2 1.825(11)  Al2―O4 1.822(13)  Al2―O16 1.899(17)  Al2―O18 2.012(16)  Al2―O19 1.975(12) | Al3 2.824  Al3―O5 2.051(14)  Al3―O6 1.990(12)  Al3―O10 1.808(12)  Al3―O11 1.782(11)  Al3―O12 1.999(11)  Al3―O14 2.051(14) | Al4 3.008  Al4―O4 1.793(15)  Al4―O8 1.993(14)  Al4―O10 1.756(11)  Al4―O13 1.984(15)  Al4―O15 2.028(19)  Al4―O20 1.980(13) | Ag1 0.920  Ag1―N1 2.093  Ag1―N2 2.187 | Ag2 0.918  Ag1―N4 2.138  Ag1―N4 2.138 |
| --- | --- | --- | --- | --- | --- |
| Ag3 0.783  Ag1―N3 2.197  Ag1―N3 2.197 | O2 1.319  Al1―O2 1.786(13)  Al2―O2 1.825(11) | O4 1.311  Al2―O4 1.822(13)  Al4―O4 1.793(15) | O10 1.407  Al3―O10 1.808(12)  Al4―O10 1.756(11) | O11 1.313  Al1―O11 1.833(10)  Al3―O11 1.782(11) |  |

**Table S18**. BVS analysis for **AlOC-149**.

| Al1 3.220  Al1―O1 1.846(4)  Al1―O5 1.890(4)  Al1―O6 1.838(3)  Al1―O7 1.906(4)  Al1―O11 1.906(4)  Al1―O14 1.906(4) | Al2 3.139  Al2―O4 1.857(4)  Al2―O6 1.838(3)  Al2―O9 1.918(4)  Al2―O10 1.908(4)  Al2―O12 1.926(4)  Al2―O17 1.904(4) | Al3 3.201  Al3―O2 1.846(4)  Al3―O3 1.903(4)  Al3―O4 1.830(3)  Al3―O16 1.912(4)  Al3―O18 1.922(4)  Al3―O19 1.895(4) | Al4 3.149  Al4―O1 1.834(3)  Al4―O2 1.852(4)  Al4―O8 1.910(4)  Al4―O13 1.920(5)  Al4―O15 1.924(4)  Al4―O21 1.905(4) | Cu1 1.866  Cu1―O20 1.974(4)  Cu1―O22 1.969(4)  Cu1―O23 1.964(4)  Cu1―O24 1.964(5)  Cu1―N1 2.159(4) |
| --- | --- | --- | --- | --- |
| Cu2 0.918  Cu2―Br1 2.4903(15)  Cu2―N2 1.947(4)  Cu2―N2 1.947(4) | O1 1.199  Al1―O1 1.846(4)  Al4―O1 1.834(3) | O2 1.170  Al3―O2 1.846(4)  Al4―O2 1.852(4) | O4 1.188  Al2―O4 1.857(4)  Al3―O4 1.830(3) | O6 1.206  Al1―O6 1.838(3)  Al2―O6 1.838(3) |

1. **PXRD analyses**





**Figure S5.** The PXRD patterns of **AlOC-137** (simulated, black; experimental, red).





**Figure S6.** The PXRD patterns of **AlOC-138** (simulated, black; experimental, red).





**Figure S7.** The PXRD patterns of **AlOC-139** (simulated, black; experimental, red).





**Figure S8.** The PXRD patterns of **AlOC-140** (simulated, black; experimental, red).





**Figure S9.** The PXRD patterns of **AlOC-141** (simulated, black; experimental, red).





**Figure S10.** The PXRD patterns of **AlOC-142** (simulated, black; experimental, red).





**Figure S11.** The PXRD patterns of **AlOC-143** (simulated, black; experimental, red).





**Figure S12.** The PXRD patterns of **AlOC-144** (simulated, black; experimental, red).





**Figure S13.** The PXRD patterns of **AlOC-146** (simulated, black; experimental, red).





**Figure S14.** The PXRD patterns of **AlOC-147** (simulated, black; experimental, red).





**Figure S15.** The PXRD patterns of **AlOC-148** (simulated, black; experimental, red).





**Figure S16.** The PXRD patterns of **AlOC-149** (simulated, black; experimental, red).

*Discussion for PXRD patterns:*

The experimental PXRD patterns for above compounds are consistent well with the simulated ones from single-crytsal X-ray diffraction, which indicates that the samples are pure (Figure S5–S16). The differences in indendity between the experimental and simulated patterns might be due to the variation in crystal orientation for power samples.

1. **FT-IR analyses**





**Figure S17.** The IR spectrum of **AlOC-137**.





**Figure S18.** The IR spectrum of **AlOC-138**.





**Figure S19.** The IR spectrum of **AlOC-139**.





**Figure S20.** The IR spectrum of **AlOC-140**.





**Figure S21.** The IR spectrum of **AlOC-141**.





**Figure S22.** The IR spectrum of **AlOC-142**.





**Figure S23.** The IR spectrum of **AlOC-143**.





**Figure S24.** The IR spectrum of **AlOC-144**.





**Figure S25.** The IR spectrum of **AlOC-146**.





**Figure S26.** The IR spectrum of **AlOC-147**.





**Figure S27.** The IR spectrum of **AlOC-148**.





**Figure S28.** The IR spectrum of **AlOC-149**.

1. **EDS analyses**





**Figure S29.** The EDS analysis profile of **AlOC-137**.





**Figure S30.** The EDS analysis profile of **AlOC-138**.





**Figure S31.** The EDS analysis profile of **AlOC-139**.





**Figure S32.** The EDS analysis profile of **AlOC-140**.





**Figure S33.** The EDS analysis profile of **AlOC-141**.





**Figure S34.** The EDS analysis profile of **AlOC-142**.





**Figure S35.** The EDS analysis profile of **AlOC-143**.





**Figure S36.** The EDS analysis profile of **AlOC-144**.





**Figure S37.** The EDS analysis profile of **AlOC-146**.





**Figure S38.** The EDS analysis profile of **AlOC-147**.





**Figure S39.** The EDS analysis profile of **AlOC-148**.





**Figure S40.** The EDS analysis profile of **AlOC-149**.

1. **Reaction equations**

**Table S19.** Reaction equation for **AlOC-137**–**AlOC-148**.

| Complex | Formula | Equation |
| --- | --- | --- |
| 8Al(OiPr)3 + 16HNA + 8H2O + molecules → Al8(OH)8(NA)16🞝molecules + 24HOiPr | | |
| **AlOC-137** | Al8(OH)8(NA)16🞝3MeCN | 8Al(OiPr)3 + 16HNA + 8H2O + 3MeCN → Al8(OH)8(NA)16🞝3MeCN + 24HOiPr |
| **AlOC-138** | Al8(OH)8(NA)16🞝HNA🞝4MeCN | 8Al(OiPr)3 + 17HNA + 8H2O + 4MeCN → Al8(OH)8(NA)16🞝HNA🞝4MeCN + 24HOiPr |
| **AlOC-139** | Al8(OH)8(NA)16🞝2HNA🞝2MeCN | 8Al(OiPr)3 + 18HNA + 8H2O + 2MeCN → Al8(OH)8(NA)16🞝2HNA🞝2MeCN + 24HOiPr |
| **AlOC-140** | Al8(OH)8(NA)16🞝2HBA | 8Al(OiPr)3 + 18HNA + 8H2O + 2AgBA + 2TBACl → Al8(OH)8(NA)16🞝2HBA + 24HOiPr + 2AgCl↓ + 2TBANA |
| **AlOC-141** | Al8(OH)8(NA)16🞝2bpy | 8Al(OiPr)3 + 16HNA + 8H2O + 2bpy → Al8(OH)8(NA)16🞝2bpy + 24HOiPr |
| 8Al(OiPr)3 + 16HNA + 8H2O + metals + ligands → Al8(OH)8(NA)16🞝complex + 24HOiPr | | |
| **AlOC-142** | Al8(OH)8(NA)16🞝Ag(bpy)2🞝NO3 | 8Al(OiPr)3 + 16HNA + 8H2O + AgNO3 + 2bpy → Al8(OH)8(NA)16🞝Ag(bpy)2🞝NO3 + 24HOiPr |
| **AlOC-143** | Al8(OH)8(NA)16🞝Ag(NA)2🞝Ag(MeCN)2 | 8Al(OiPr)3 + 18HNA + 8H2O + 2AgAc + 2MeCN →Al8(OH)8(NA)16🞝Ag(NA)2🞝Ag(MeCN)2 + 2HAc + 24HOiPr |
| **AlOC-144** | Al8(OH)8(NA)16🞝HAg(BA)2 | 8Al(OiPr)3 + 16HNA + 8H2O + 2AgBA → Al8(OH)8(NA)16🞝HAg(BA)2 + 23HOiPr + AgOiPr |
| **AlOC-145** | Al8(OH)8(NA)16🞝Na(AQS)2🞝Ag(MeCN)(bpy)0.5 | 8Al(OiPr)3 + 16HNA + 8H2O + 2NaAQS + AgNO3 + 0.5bpy + MeCN → Al8(OH)8(NA)16🞝Na(AQS)2🞝Ag(MeCN)(bpy)0.5 + 24HOiPr + NaNO3 |
| **AlOC-146** | Al8(OH)8(NA)16🞝NO3🞝Ag(MeCN)(bpy)🞝MeCN | 8Al(OiPr)3 + 16HNA + 8H2O + AgNO3 + 2MeCN + bpy →Al8(OH)8(NA)16🞝NO3🞝Ag(MeCN)(bpy)🞝MeCN + 24HOiPr |
| 8nAl(OiPr)3 + 16nHNA + 8nH2O + metals + ligands → [Al8(OH)8(NA)16]n🞝polymer + 24nHOiPr | | |
| **AlOC-147** | [Al8(OH)8(NA)16🞝NA]n🞝Agn(bpy)n | 8nAl(OiPr)3 + 17nHNA + 8nH2O + nAgNO3 + nbpy → [Al8(OH)8 (NA)16🞝NA]n🞝Agn(bpy)n + 24nHOiPr + nHNO3 |
| **AlOC-148** | [Al8(OH)8(NA)16]n🞝Ag2n(bpy)2n🞝2nNO3 | 8nAl(OiPr)3 + 16nHNA + 8nH2O + 2nAgNO3 + 2nbpy → [Al8(OH)8(NA)16]n🞝Ag2n(bpy)2n🞝2nNO3 + 24nHOiPr |
| **AlOC-149** | [Al8(OH)8(NA)16🞝2MeCN]n🞝n[CuBr(bpy)2]🞝n[Cu2(NA)4] | 8nAl(OiPr)3 + 20nHNA + 8nH2O + 3nCuBr + 2nbpy + n/2O2 + 2nMeCN → [Al8(OH)8(NA)16🞝2MeCN]n🞝n[CuBr(bpy)2]🞝n[Cu2(NA)4] + 24nHOiPr + nH2O + 2nHBr |

1. **UV-vis analyses**





**Figure S41.**  UV-vis absorption spectrum of **AlOC-137**. Inset: the diffuse reflectance UV-vis spectrum of **AlOC-137**.





**Figure S42.** UV-vis absorption spectrum of **AlOC-138**. Inset: the diffuse reflectance UV-vis spectrum of **AlOC-138**.





**Figure S43.** UV-vis absorption spectrum of **AlOC-139**. Inset: the diffuse reflectance UV-vis spectrum of **AlOC-139**.





**Figure S44.** UV-vis absorption spectrum of **AlOC-140**. Inset: the diffuse reflectance UV-vis spectrum of **AlOC-140**.





**Figure S45.** UV-vis absorption spectrum of **AlOC-141**. Inset: the diffuse reflectance UV-vis spectrum of **AlOC-141**.





**Figure S46.** UV-vis absorption spectrum of **AlOC-142**. Inset: the diffuse reflectance UV-vis spectrum of **AlOC-142**.





**Figure S47.** UV-vis absorption spectrum of **AlOC-143**. Inset: the diffuse reflectance UV-vis spectrum of **AlOC-143**.





**Figure S48.** UV-vis absorption spectrum of **AlOC-144**. Inset: the diffuse reflectance UV-vis spectrum of **AlOC-144**.





**Figure S49.** UV-vis absorption spectrum of **AlOC-146**. Inset: the diffuse reflectance UV-vis spectrum of **AlOC-146**.





**Figure S50.** UV-vis absorption spectrum of **AlOC-147**. Inset: the diffuse reflectance UV-vis spectrum of **AlOC-147**.





**Figure S51.** UV-vis absorption spectrum of **AlOC-148**. Inset: the diffuse reflectance UV-vis spectrum of **AlOC-148**.





**Figure S52.** UV-vis absorption spectrum of **AlOC-149**. Inset: the diffuse reflectance UV-vis spectrum of **AlOC-149**.

1. **Structure description for AlOC-137 to AlOC-149**


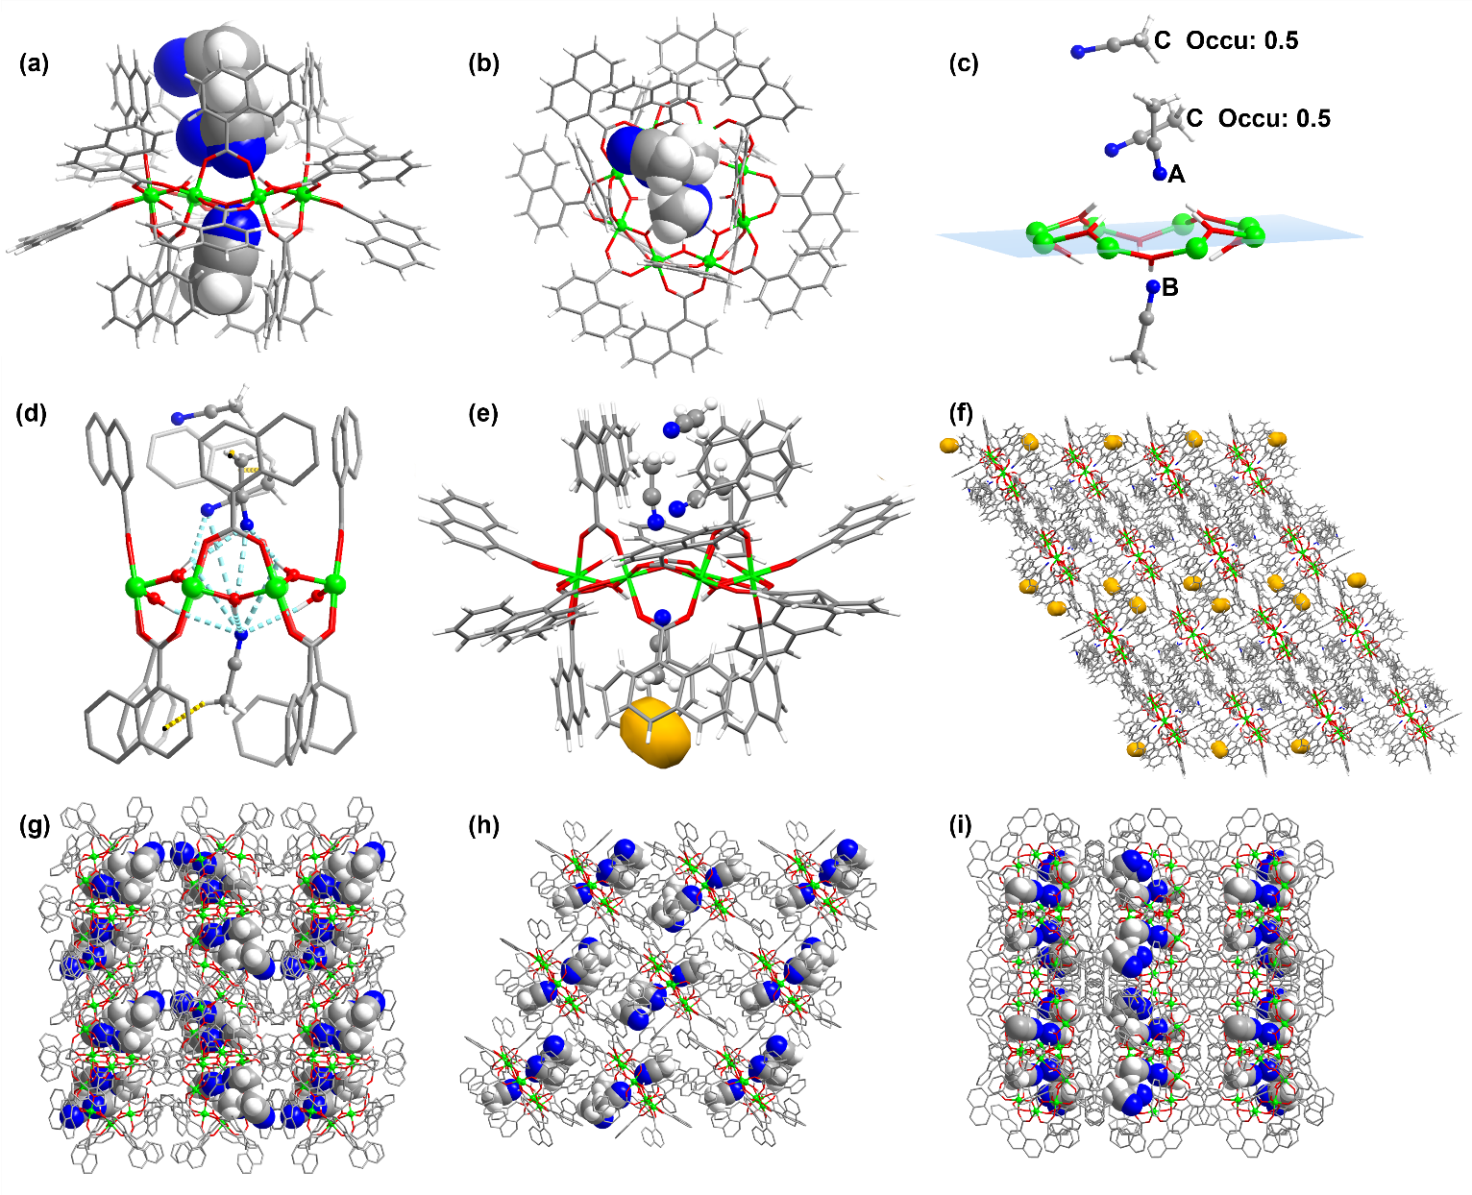


**Figure S53.** The structure and packing views of **AlOC-137**. (a) The side view of **AlOC-137**. (b) The top view of **AlOC-137**. (c) the distribution of three MeCN guests in **AlOC-137**. (d) The interactions between MeCN guests and Al8 macrocycle. The strong hydrogen-bond interactions (O-H···N), C-H···π interactions are respectively highlighted by wathet dotted bonds and yellow dotted bonds. (e) The simulated [residual](file:///H:\ruanjian\general%20software\Youdao\Dict\7.5.2.0\resultui\dict\?keyword=residual) cavity and pore surface structure of **AlOC-137** through Mercury analysis. (f) The distribution of [residual](file:///H:\ruanjian\general%20software\Youdao\Dict\7.5.2.0\resultui\dict\?keyword=residual) cavities in **AlOC-137**. (g) The packing view of **AlOC-137** along the crystallographic a-axis. (h) The packing view of **AlOC-137** along the crystallographic b-axis. (i) The packing view of **AlOC-137** along the crystallographic c-axis. Color code: Al, green; O, red; C, grey; H, white; N, blue.

**AlOC-137** crystallizes in the *P*2/c space group (no. 13), contains one Al8 macrocycle and three MeCN guests (Fig. S53a and S53b). As shown in Fig. S53c, two orientations were identified for three MeCN guests. MeCN (A) and MeCN (B) are perpendicular to Al8 macrocycle in head-to-head fashion. Each N atom of MeCN (A) and MeCN (B) was located below or above Al8 macrocycle with the O-H…N distances of 3.021–3.922 Å and C-H···π distances of 3.541–3.673 Å (Fig. S53d). MeCN (C) is disordered in two position, and approximately parallel to Al8(OH)8 plane. It is fixed to the upper cavity of Al8 macrocycle through two O-H…N interactions (3.541 Å and 3.673 Å) and two C-H···π interactions (2.892 Å and 4.093 Å). Thus, a small residual intramolecular cavity can be found below Al8 plane through the comparison of two hydrophilic cavities (Fig. S53e and S53f). Besides, due to the dense accumulation of Al8 macrocycle (Fig. S53g–S53i), there is no intermolecular cavity or pore stuctures in **AlOC-137**. Thus, the calculated porosity is only 1.1% for **AlOC-137** according to PLATON.


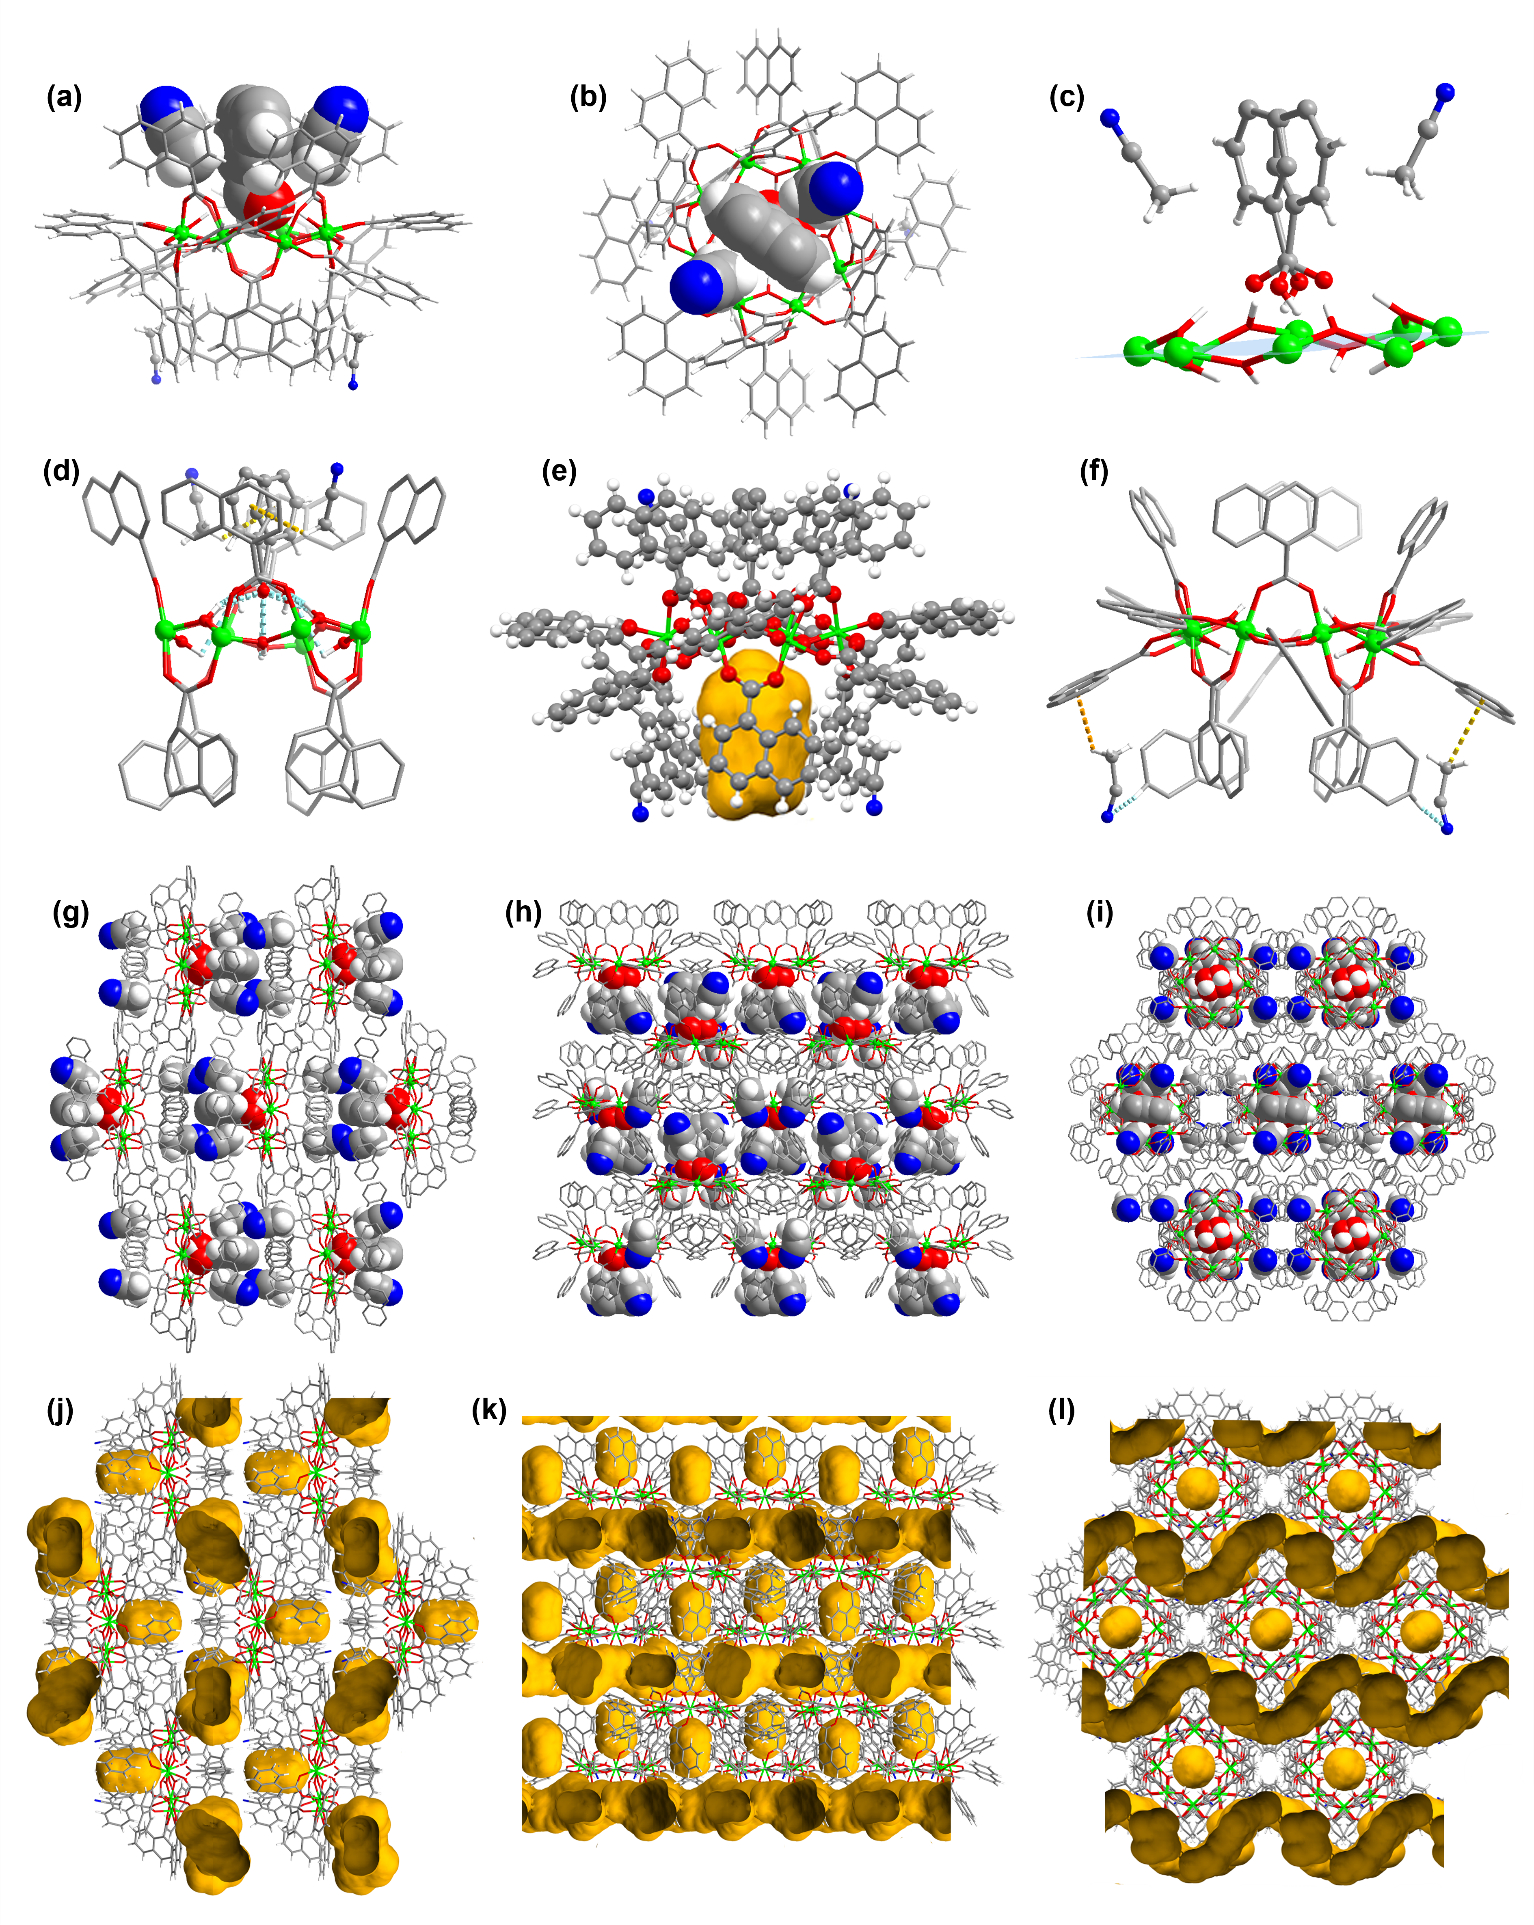


**Figure S54.** The structure and packing views of **AlOC-138**. (a) The side view of **AlOC-138**. (b) The top view of **AlOC-138**. (c) The distribution of HNA and two inner MeCN guests in **AlOC-138**. (d) The interactions between HNA guests, inner MeCN guests and Al8 macrocycle. The strong hydrogen-bond interactions (O-H···O), C-H···π interactions, π···π interactions are respectively highlighted by wathet dotted bonds, yellow dotted bonds and lilac dotted bonds. (e) The remaining cavity in **AlOC-138**. (f) The interactions between two external MeCN guests and Al8 macrocycle. (g) The packing view of **AlOC-138** along the crystallographic a-axis. (h) The packing view of **AlOC-138** along the crystallographic b-axis. (i) The packing view of **AlOC-138** along the crystallographic c-axis. (j) The simulated pore surface structure of **AlOC-138** along the crystallographic a-axis through Mercury analysis. (k) The simulated pore surface strcuture of **AlOC-138** along the crystallographic b-axis through Mercury analysis. (l) The simulated pore surface strcuture of **AlOC-138** along the crystallographic c-axis through Mercury analysis. Color code: Al, green; O, red; C, grey; H, white; N, blue.

**AlOC-138** crystallizes in *P*ccn space group, contains one Al8 macrocycle, one HNA guests and four MeCN guests (Fig. S54a and S54b). The HNA and two MeCN guests are located on the one side of Al8(OH)8 plane and confined in the hydrophobic cavity (Fig. S54c). The HNA interact with Al8 macrocycle through 12 O-H…O hydrogen bonds (bond lengths: 2.886–3.060 Å), and the two inner MeCN guests further bonded with HNA guest through C-H…π interactions (bond length: 3.583 Å) (Fig. S54d). The other side of Al8(OH)8 plane is not occupied by any guest, thus, a residual cavity can be observed on Fig. S54e. For the outside MeCN guests, they interact with Al8 macrocycles through C-H…π interaction (bond length: 3.540 Å) and C-H…N interaction (bond length: 2.580 Å). The Al8 macrocycles in **AlOC-201** were stacked in parallel with -ABAB- alternations (Fig. S54g–S54i), and form obvious intramolecular channel with minimum diameter of 7.088 Å (Fig. S54j–S54l). The calculated total solvent accessible volume for **AlOC-201** is 597.3 Å3, and porosity is 13.6%.


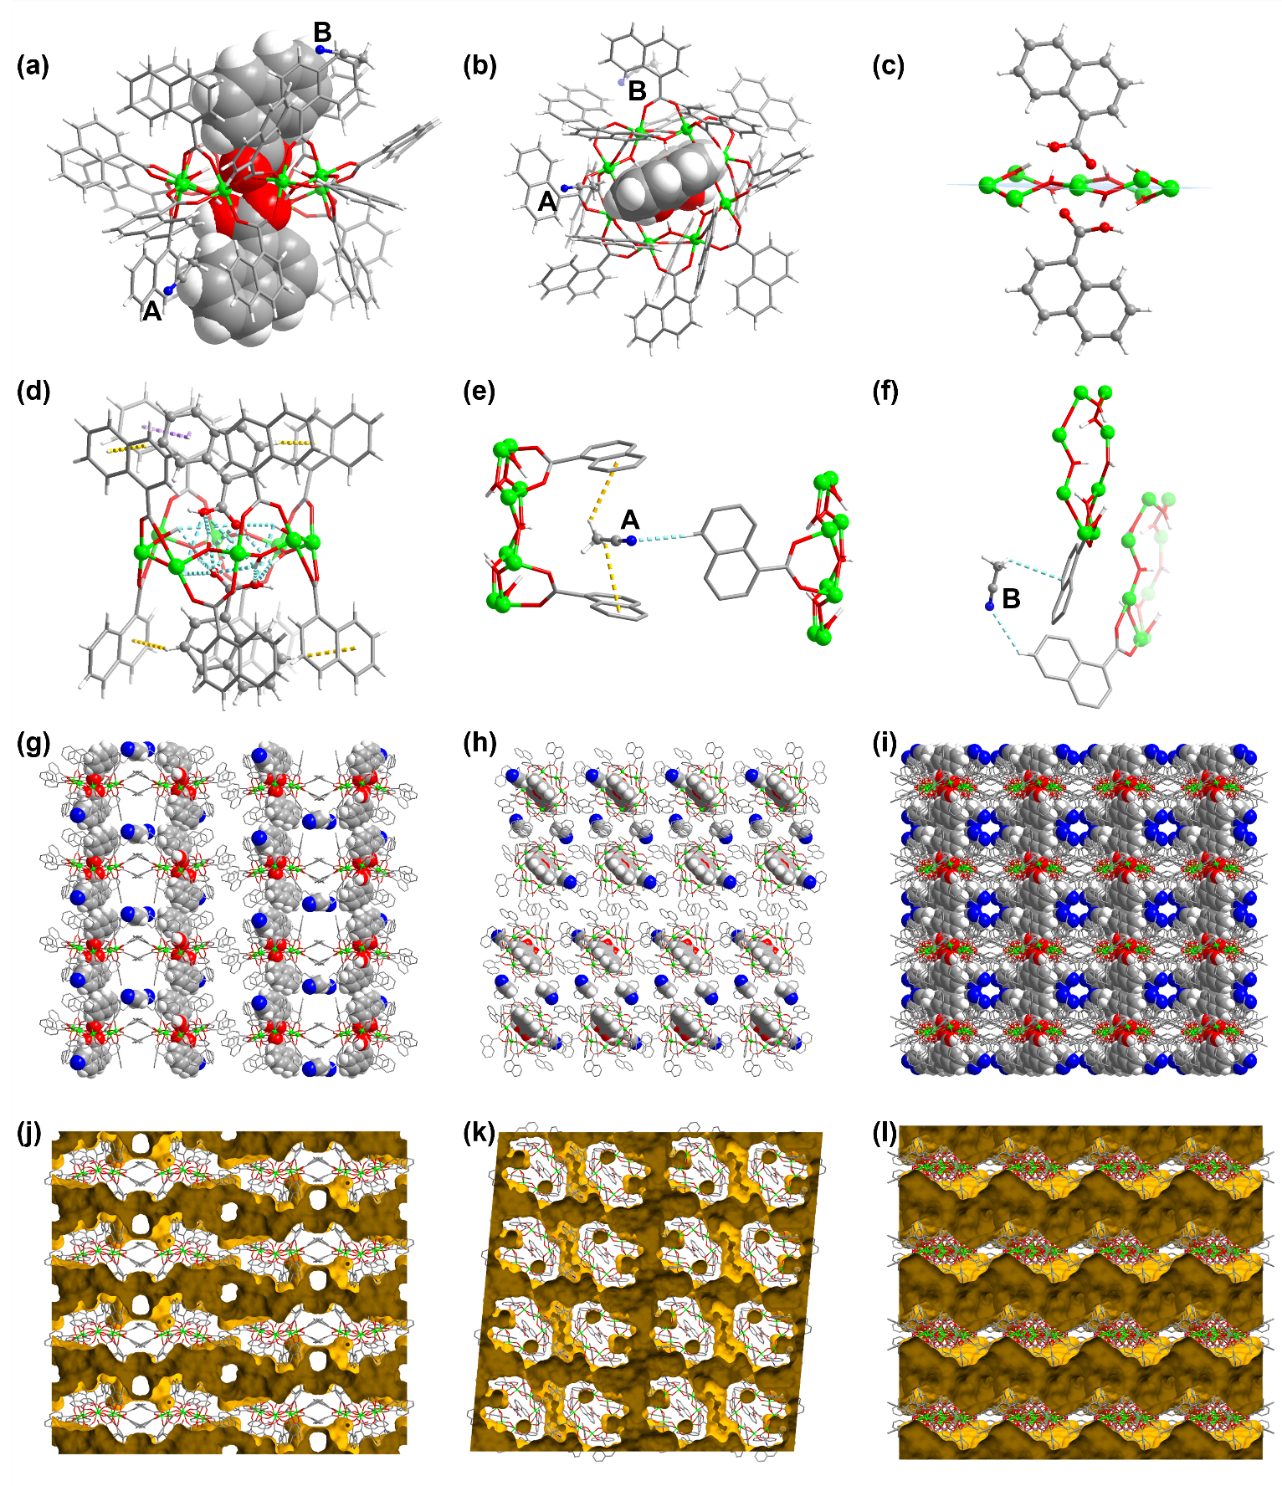


**Figure S55.** The structure and packing views of **AlOC-139**. (a) The side view of **AlOC-139**; (b) The top view of **AlOC-139**; (c) the distribution of two HNA guests in **AlOC-139**; (d) the interactions between HNA guests and Al8 macrocycle. The strong hydrogen-bond interactions (O-H···O), C-H···π interactions, π…π interactions are respectively highlighted by wathet dotted bonds, yellow dotted bonds and lilac dotted bonds; (e) The C-H···π and C-H···N interactions between MeCN (A) and two neighboring Al8 macrocycles; (f) The C-H···π and C-H···N interactions between MeCN (B) and two neighboring Al8 macrocycles; (g) the packing view of **AlOC-139** along the crystallographic a-axis; (h) the packing view of **AlOC-139** along the crystallographic b-axis; (i) the packing view of **AlOC-139** along the crystallographic c-axis; (j) the simulated pore surface structure of **AlOC-139** along the crystallographic a-axis through Mercury analysis; (k) the simulated pore surface strcuture of **AlOC-139** along the crystallographic b-axis through Mercury analysis; (l) the simulated pore surface strcuture of **AlOC-139** along the crystallographic c-axis through Mercury analysis. Color code: Al, green; O, red; C, grey; H, white; N, blue.

**AlOC-139** crystallizes in monoclinic *P*2/c space group, contains one Al8 macrocycle, two HNA guests and two MeCN guests (Fig. S55a and S55b). The two HNA guests are located on the upper and lower sides of Al8(OH)8 plane (Fig. S55c), and interact with Al8 macrocycle through 17 hydrogen bonds (O-H…O bond lengths: 2.859–3.966 Å), 4 C-H···π interactions (bond lengths: 3.532–3.906 Å) and 2 π···π interactions (bond lengths: 3.755–3.992 Å) (Fig. S55d). The MeCN (A) is located on the top of hydrophobic cavity, and interact with two Al8 macrocycle through two C-H···π interactions (bond lengths: 3.811–3.943 Å) and C-H···N interaction (bond length: 3.613 Å) (Fig. S55e). The other MeCN (B) is located on the outside of Al8 macrocycle, and fixed by two NA ligands through C-H···N (3.797 Å) and C-H···C interactions (3.760 Å) (Fig. S55f). Besides, the Al8 macrocycles in **AlOC-139** were stacked in -ABCD- alternations (Fig. S55g–S55i), and form 2D channel when viewed from b direction (Fig. S55j–S55l). The calculated total solvent accessible volume for **AlOC-139** is 2233.9 Å3, and porosity is 25.5%.


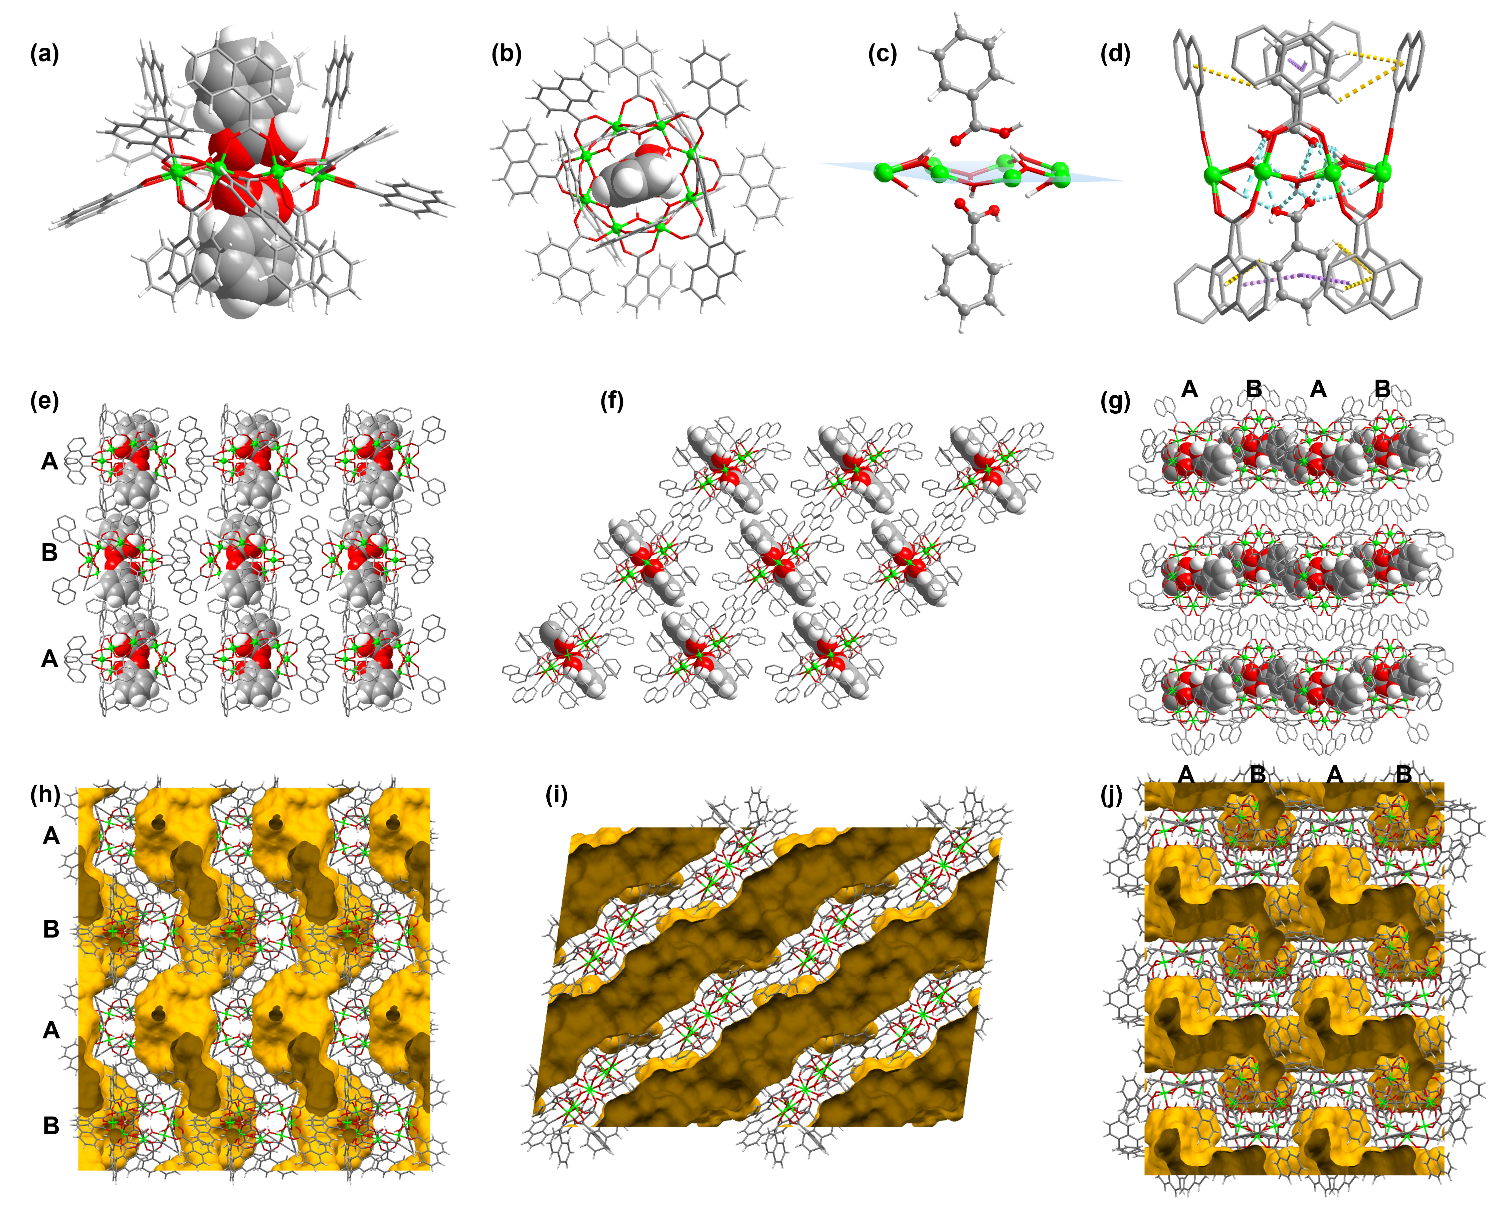


**Figure S56.** The structure and packing views of **AlOC-140**. (a) The side view of **AlOC-140**. (b) The top view of **AlOC-140**. (c) the distribution of two HBA guests in **AlOC-140**. (d) The interactions between HBA guests and Al8 macrocycle. The strong hydrogen-bond interactions (O-H···O), C-H···π interactions, π···π interactions are respectively highlighted by wathet dotted bonds, yellow dotted bonds and lilac dotted bonds. (e) The packing view of **AlOC-140** along the crystallographic a-axis. (f) The packing view of **AlOC-140** along the crystallographic b-axis. (g) The packing view of **AlOC-140** along the crystallographic c-axis. (h) The simulated pore surface strcuture of **AlOC-140** along the crystallographic a-axis through Mercury analysis. (i) The simulated pore surface strcuture of **AlOC-140** along the crystallographic b-axis through Mercury analysis. (j) The simulated pore surface strcuture of **AlOC-140** along the crystallographic c-axis through Mercury analysis. Color code: Al, green; O, red; C, grey; H, white; N, blue.

**AlOC-140** crystallizes in *P*2/n space group, contains one Al8 macrocycle and two HBA guests (Fig. S56a and S56b). The two HBA guests are located on the upper and lower sides of Al8(OH)8 plane (Fig. S56c), and interact with Al8 macrocycle through 16 hydrogen bonds (O-H…O bond lengths: 2.761–3.800 Å), 6 C-H···π interactions (bond lengths: 3.534–3.977 Å) and 4 π···π interactions (bond lengths: 3.791–3.955 Å) (Fig. S56d). The Al8 macrocycles in **AlOC-140** were stacked in parallel with -ABAB- alternations (Fig. S56e–S56g), and form obvious intramolecular channel with minimum diameter of 13.42 Å (Fig. S56h–S56j). The calculated total solvent accessible volume for **AlOC-140** is 2233.9 Å3, and porosity is 23.8%.


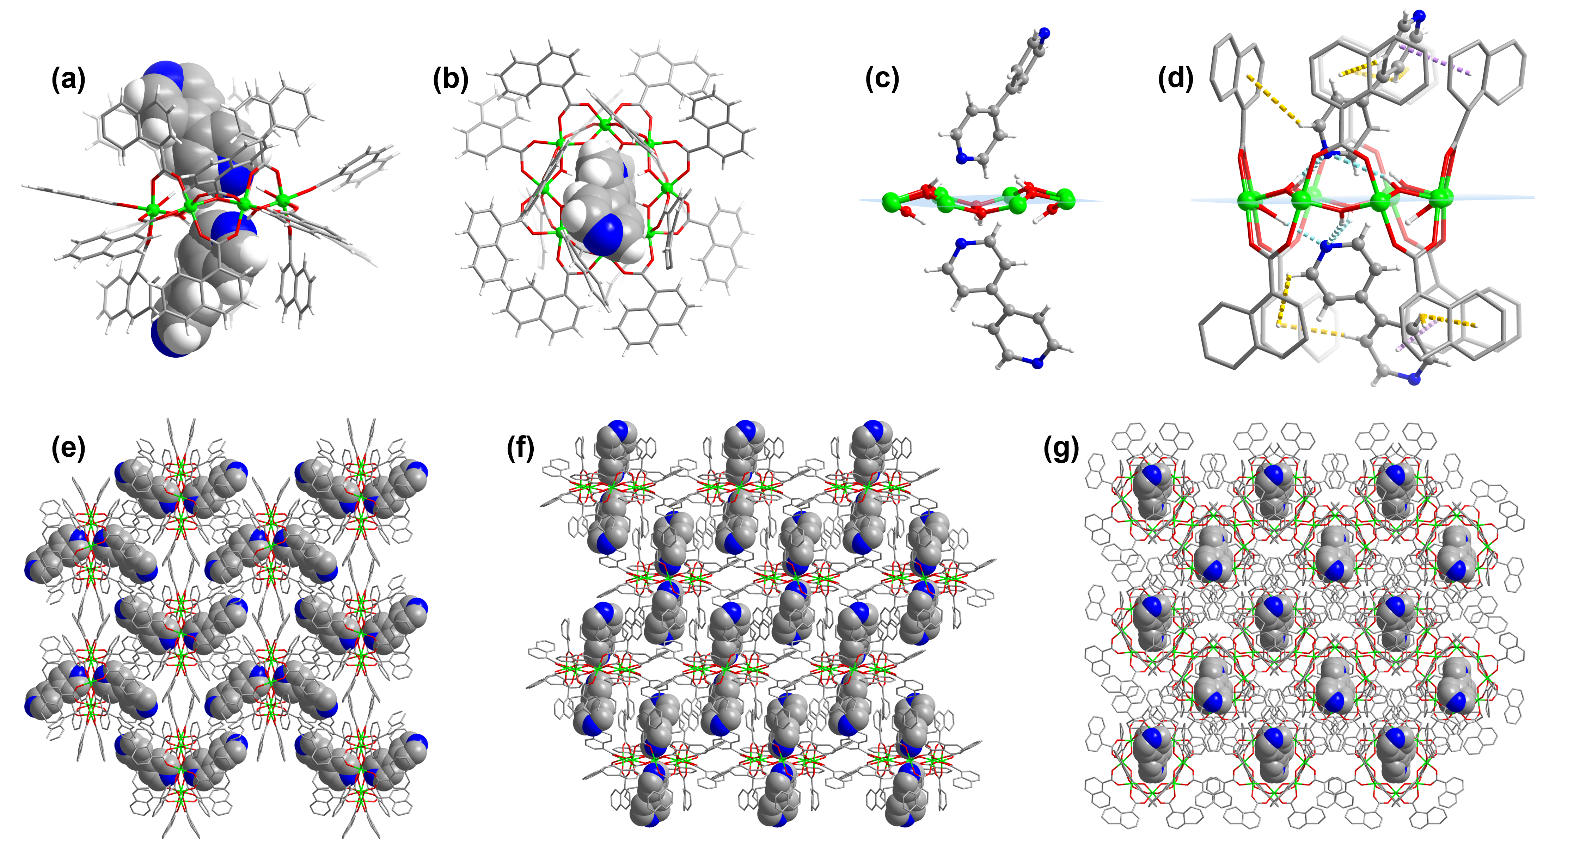


**Figure S57.** The structure and packing views of **AlOC-141**. (a) The side view of **AlOC-141**. (b) The top view of **AlOC-141**. (c) The distribution of two bpy guests in **AlOC-141**. (d) The interactions between bpy guests and Al8 macrocycle. The strong hydrogen-bond interactions (O-H···O), C-H···π interactions, π···π interactions are respectively highlighted by wathet dotted bonds, yellow dotted bonds and lilac dotted bonds. (e) The packing view of **AlOC-141** along the crystallographic a-axis. (f) The packing view of **AlOC-201** along the crystallographic b-axis. (g) The packing view of **AlOC-141** along the crystallographic c-axis. Color code: Al, green; O, red; C, grey; H, white; N, blue.

**AlOC-141** crystallizes in *P*2/n space group, contains one Al8 macrocycle and two bpy guests (Fig. S57a and S57b). The two slant bpy guests are located on the upper and lower sides of Al8(OH)8 plane (Fig. S57c), and interact with Al8 macrocycle through 16 hydrogen bonds (O-H…N bond lengths: 2.934–3.975 Å), 6 C-H···π interactions (bond lengths: 3.846–3.901 Å) and 2 π···π interactions (bond lengths: 3.238 Å) (Fig. S57d). The Al8 macrocycles in **AlOC-141** were stacked compactly in -ABAB- alternations (Fig. S57e–S57g), thus, there is no solvent accessible volume for **AlOC-141**.


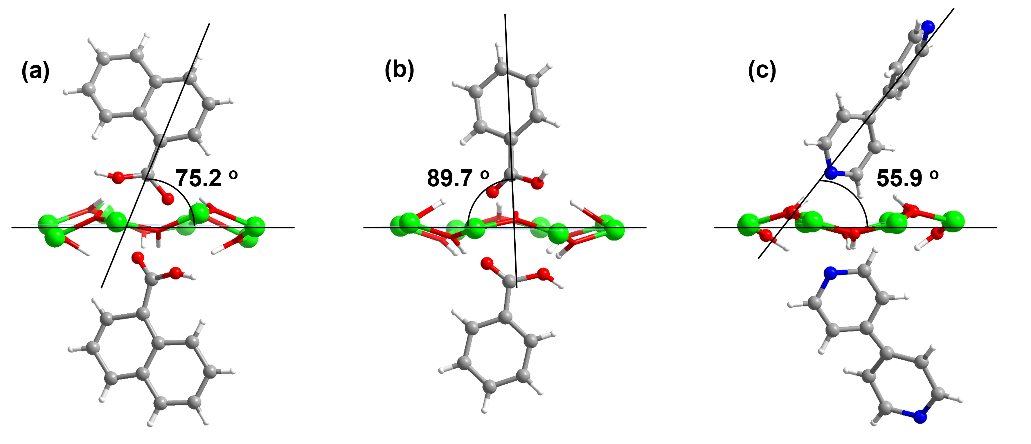


**Figure S58.** The angle of guest tilt in **AlOC-139** (a), **AlOC-140** (b) and **AlOC-141** (c). Color code: Al, green; O, red; C, grey; H, white; N, blue.


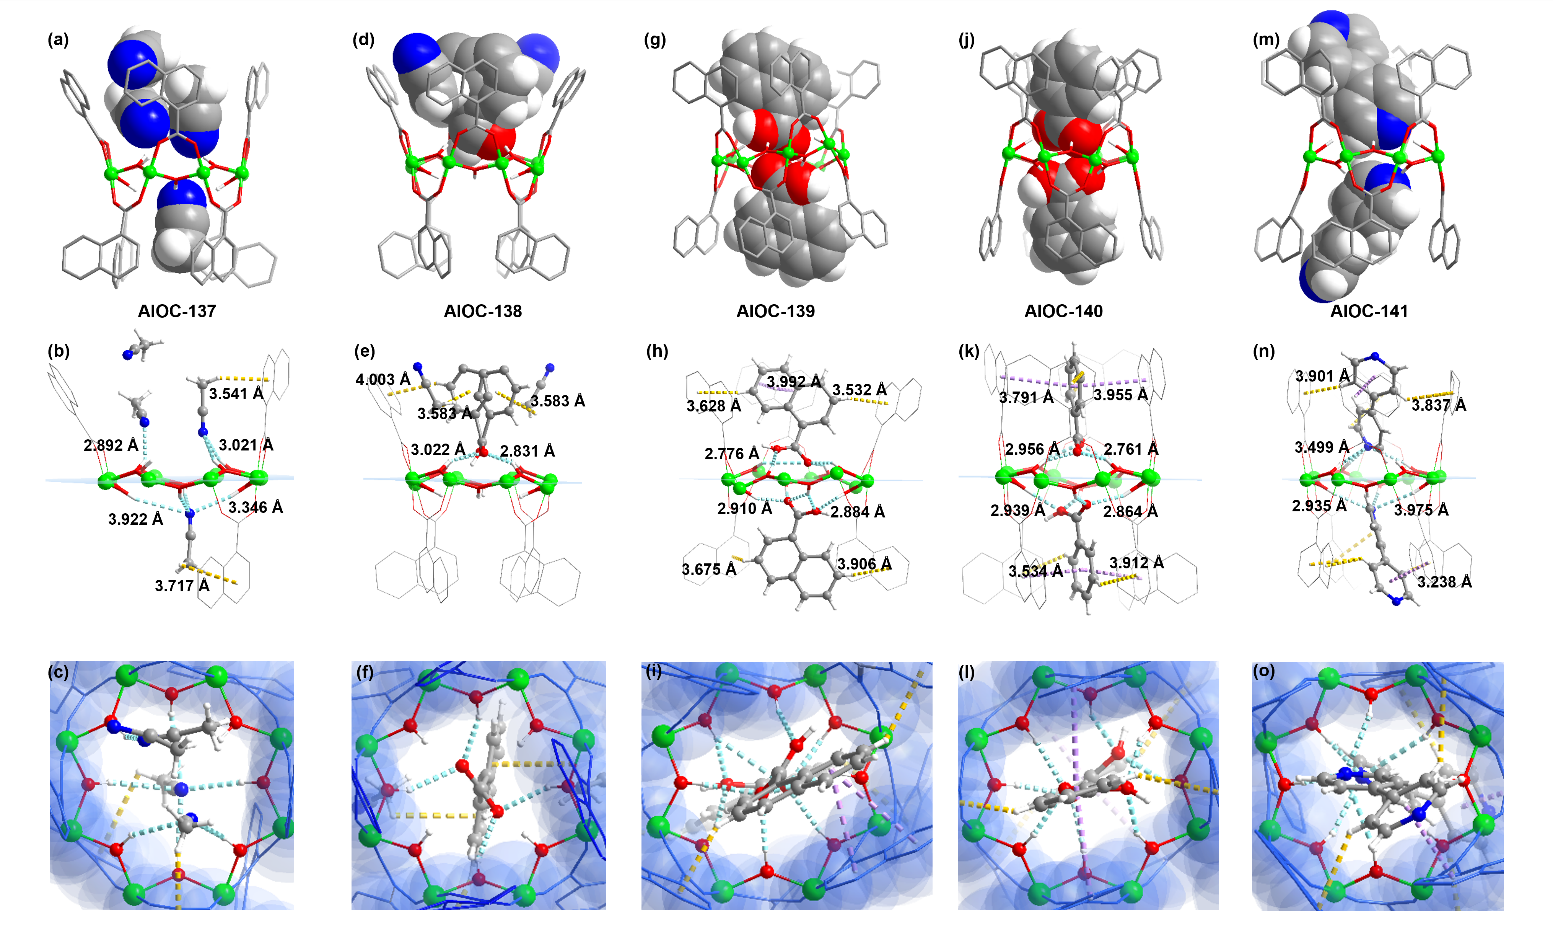


**Figure S59.** The embedded molecule guests in Al8 macrocycle. (a, d, g, j and m) The distribution of molecule guests in Al8 macrocycle in **AlOC-137**–**AlOC-141**. The coordinated equatorial NA ligand have been omitted for clarify. (b, e, h, k and n) The dominating interactions between molecule guests and Al8 macrocycle. The strong hydrogen-bond interactions (O-H···O), C-H···π interactions, π···π interactions are respectively highlighted by wathet dotted bonds, yellow dotted bonds and lilac dotted bonds. (c, f, i, l and o) The top view of Al8 macrocycle with confined molecule guests. Color code: Al, green; O, red; C, grey; H, white; N, blue.


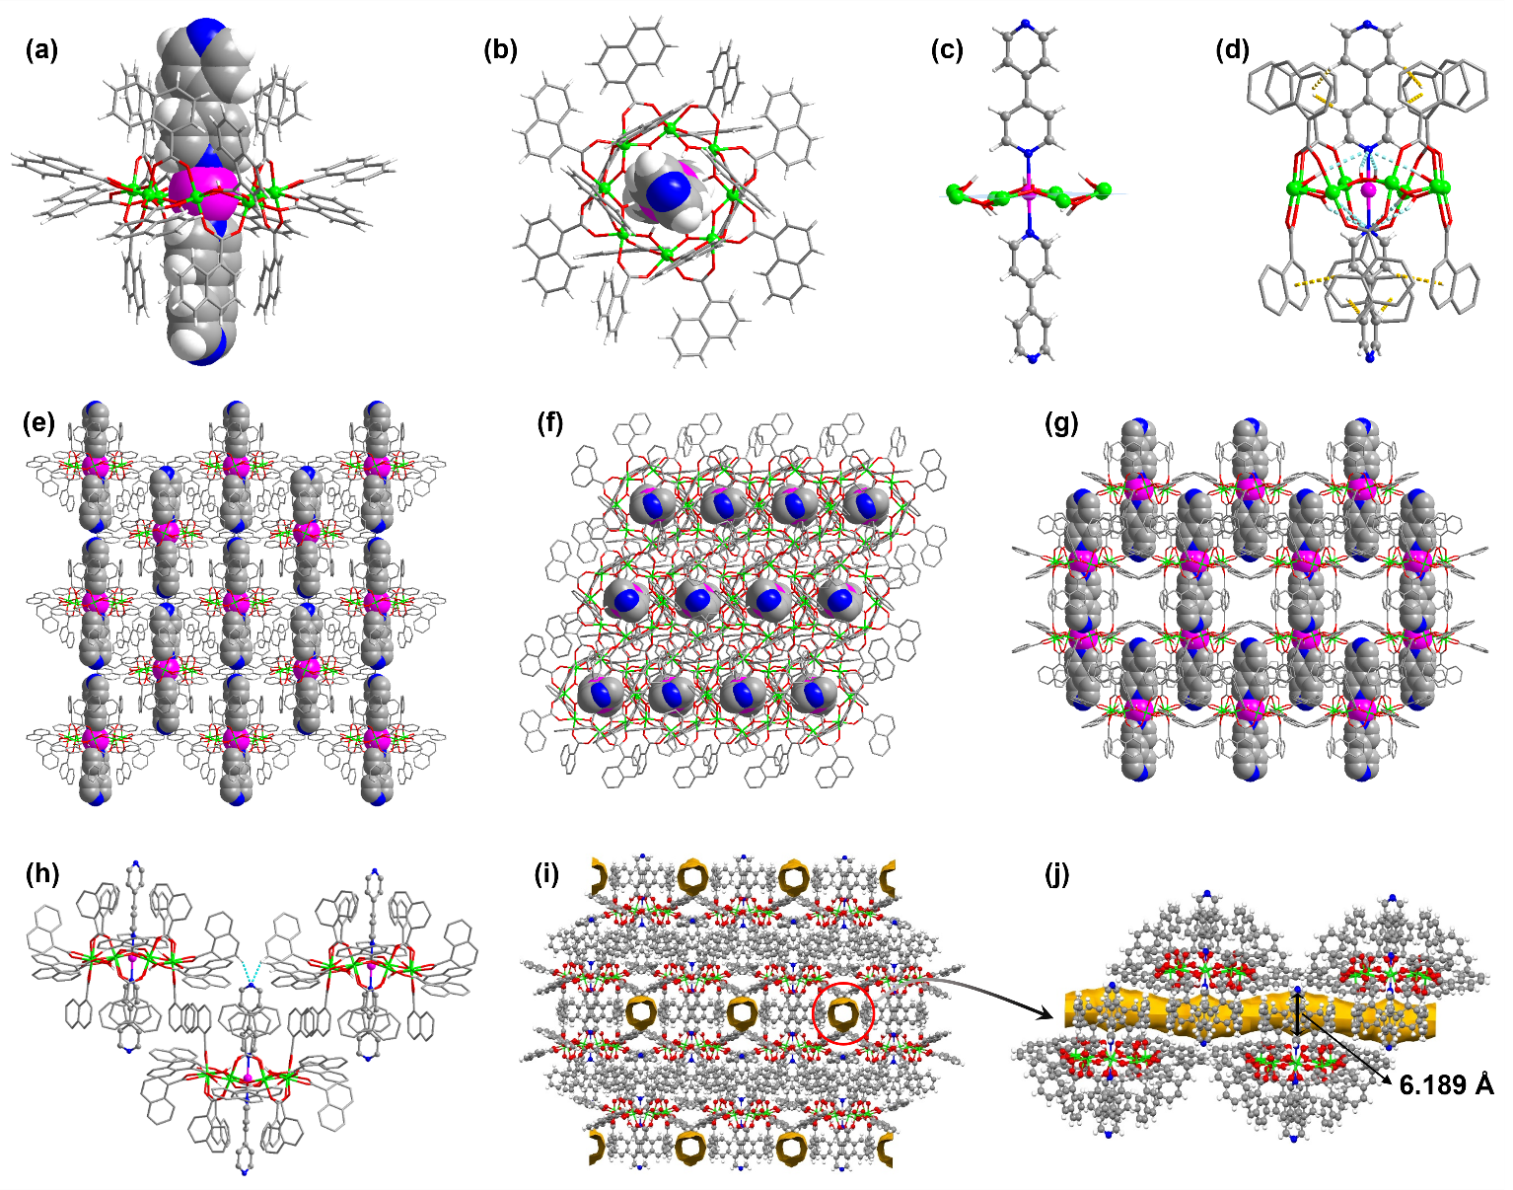


**Figure S60.** The structure and packing views of **AlOC-142**. (a) The side view of **AlOC-142**. (b) The top view of **AlOC-142**. (c) The distribution of Ag(bpy)2 guests in **AlOC-142**. (d) The interactions between Ag(bpy)2 guests and Al8 macrocycle. The strong hydrogen-bond interactions (O-H···N), C-H···π interactions, π···π interactions are respectively highlighted by wathet dotted bonds, yellow dotted bonds and lilac dotted bonds. (e) The packing view of **AlOC-142** along the crystallographic a-axis. (f) The packing view of **AlOC-142** along the crystallographic b-axis. (g) The packing view of **AlOC-142** along the crystallographic c-axis. (h) The interactions between Ag(bpy)2 thread with two outside Al8 macrocycles. (i) The simulated pore surface strcuture of **AlOC-142** along the crystallographic c-axis through Mercury analysis. (j) The side view of channel in **AlOC-142** along the crystallographic a-axis through Mercury analysis. Color code: Al, green; O, red; C, grey; H, white; N, blue; Ag, pink.

**AlOC-142** crystallizes in *C*2/c space group, contains one Al8 macrocycle and one Ag(bpy)2 thread (Fig. S60a and S60b). The Ag(bpy)2 thread is perpendicular to Al8(OH)8 plane (Fig. S60c), and interact with Al8 macrocycle through 8 O-H…N hydrogen bonds (bond lengths: 3.688–3.771 Å) and 8 C-H···π interactions (bond lengths: 3.865–3.871 Å) (Fig. S60d). The Al8 macrocycles in **AlOC-142** were stacked parallelly in -AABB- mode when viewed from c axis (Fig. S60e–S60g). Besides, there are strong C-H···N interactions (bond length: 3.5119 Å) between uncoordinated N sites on Ag(bpy)2 threads and two neighboring Al8 macrocycle, thus, the further extension of thread was prevented. A perforative intermolecular channel can be found in **AlOC-142** with the maximum diameter of 6.189 Å. The calculated total solvent accessible volume is 1227.9 Å3 for **AlOC-142**, and porosity is 7.2%.


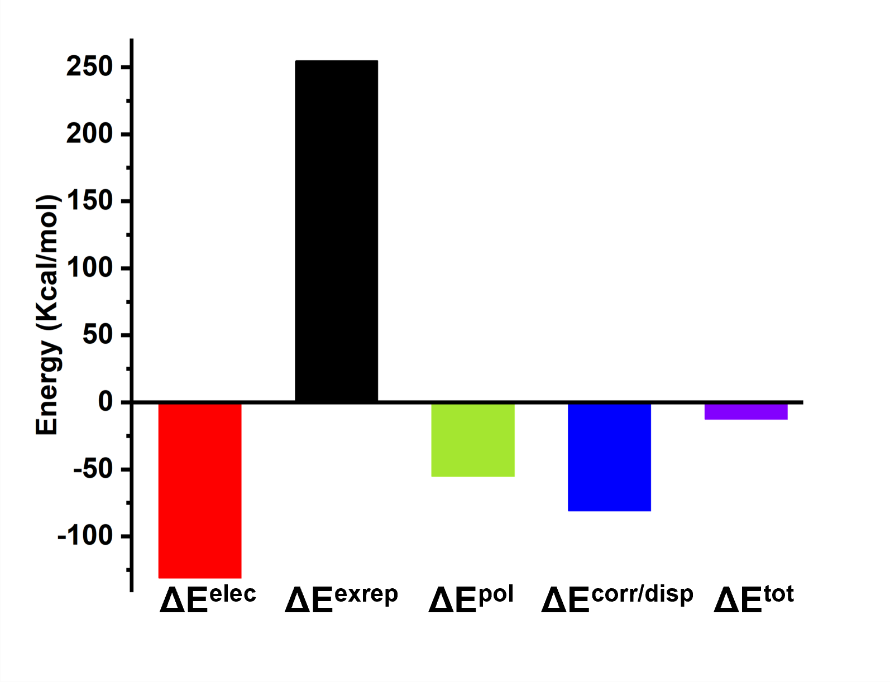


**Figure S61.** EDA data between Al8 macrocycle and Ag(bpy)2. ΔEelec is the electrostatic energy with the value of -131.04 kcal/mol, ΔEexrep is the exchenge/repulsion energy with the value of 254.53 kcal/mol, ΔEpol represents the polarization energy with the value of -55.10 kcal/mol, ΔEcorr/disp is the electron correlation energy with the value of -80.92 kcal/mol, ΔEtot is the total interaction energy with the value of -12.52 kcal/mol.


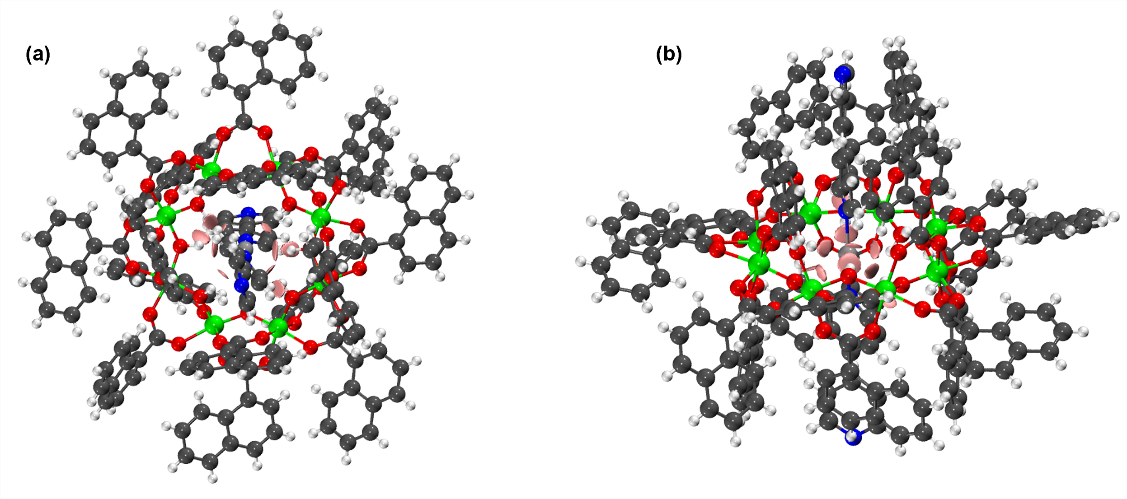


**Figure S62.** The IGMH graph when ginter= 0.01. The electrostatic interaction between Ag(bpy)2 thread and Al8 macrocycle is mainly concentrated between the Ag+ and μ2-OH groups. Color code: Al, green; O, red; C, black; H, white; N, blue; Ag, grey.


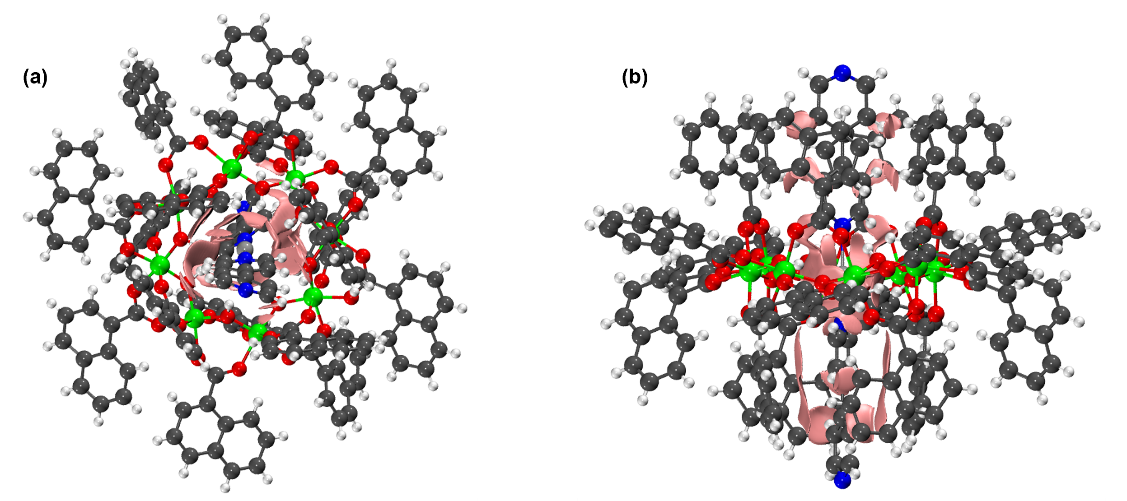


**Figure S63.** The IGMH graph when ginter= 0.004. There is weak van der Waals interactions between Ag(bpy)2 thread and Al8 macrocycle. Color code: Al, green; O, red; C, black; H, white; N, blue; Ag, grey.


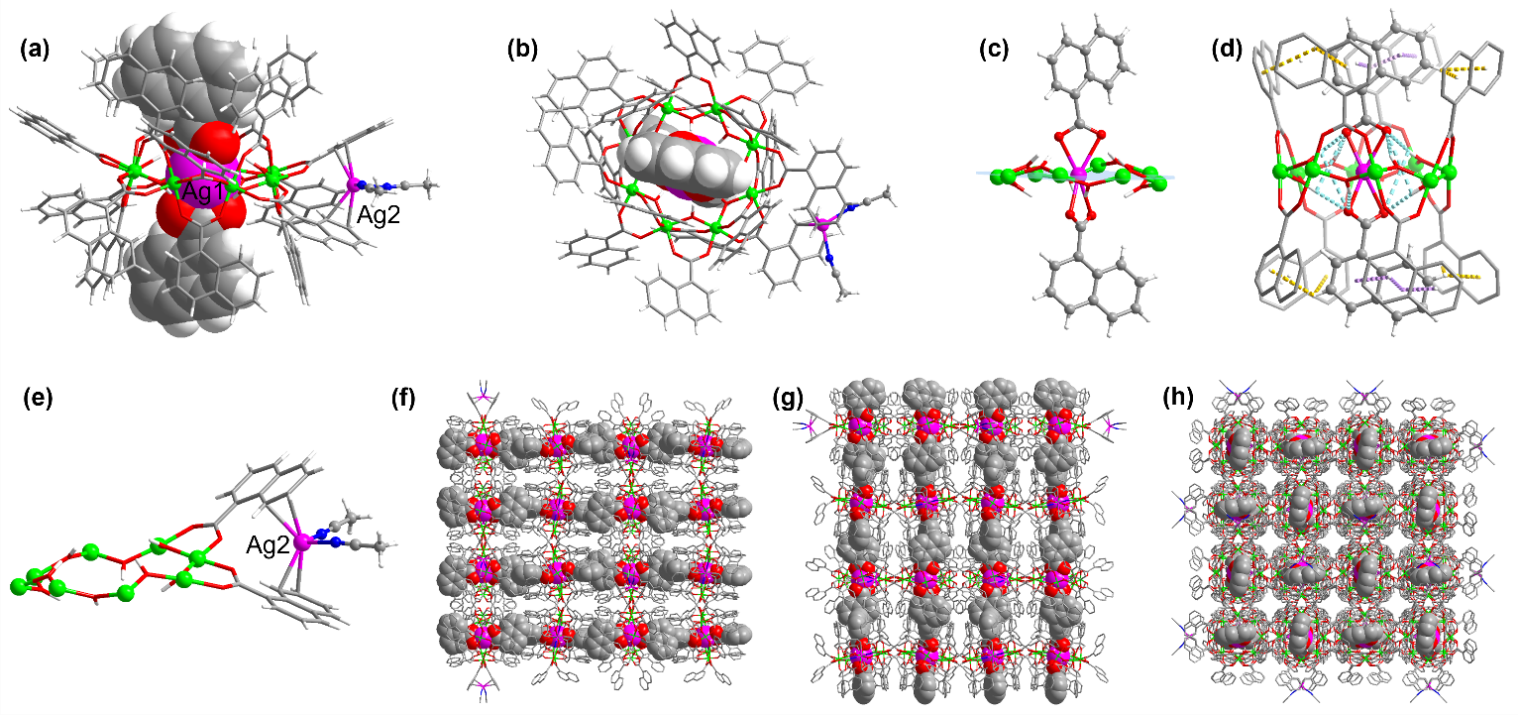


**Figure S64.** The structure and packing views of **AlOC-143**. (a) The side view of **AlOC-143**. (b) The top view of **AlOC-143**. (c) The distribution of [Ag(NC)2]– guest in **AlOC-143**. (d) The interactions between [Ag(NC)2]– guest and Al8 macrocycle. The strong O-H···O hydrogen-bond interactions, C-H···π interactions, π···π interactions are respectively highlighted by wathet dotted bonds, yellow dotted bonds and lilac dotted bonds. (e) The coordination environment of Ag2 in **AlOC-143**. (f) The packing view of **AlOC-143** along the crystallographic a-axis. (g) The packing view of **AlOC-143** along the crystallographic b-axis. (h) The packing view of **AlOC-143** along the crystallographic c-axis. Color code: Al, green; O, red; C, grey; H, white; N, blue; Ag, pink.

**AlOC-143** crystallizes in *I*-42*d* space group, contains one Al8 macrocycle, one [Ag(NC)2]– thread and one [Ag(MeCN)2]+ (Fig. S64a and S64b). The [Ag(NC)2]– thread is perpendicular to Al8(OH)8 plane (Fig. S64c), and interact with Al8 macrocycle through 12 O-H…O hydrogen bonds (bond lengths: 2.970–3.463 Å), 8 C-H···π interactions (bond lengths: 3.483–3.987 Å) (Fig. S64d) and 6 π···π interactions (bond lengths: 3.669–4.085 Å). The [Ag(MeCN)2]+ is located between two equatorial coordinated NA ligands and fixed through weak Ag–C bonds (Fig. S64e). The Al8 macrocycles in **AlOC-143** were stacked campactly (Fig. S64f–S64h), and the calculated total solvent accessible porosity is 4.2%.


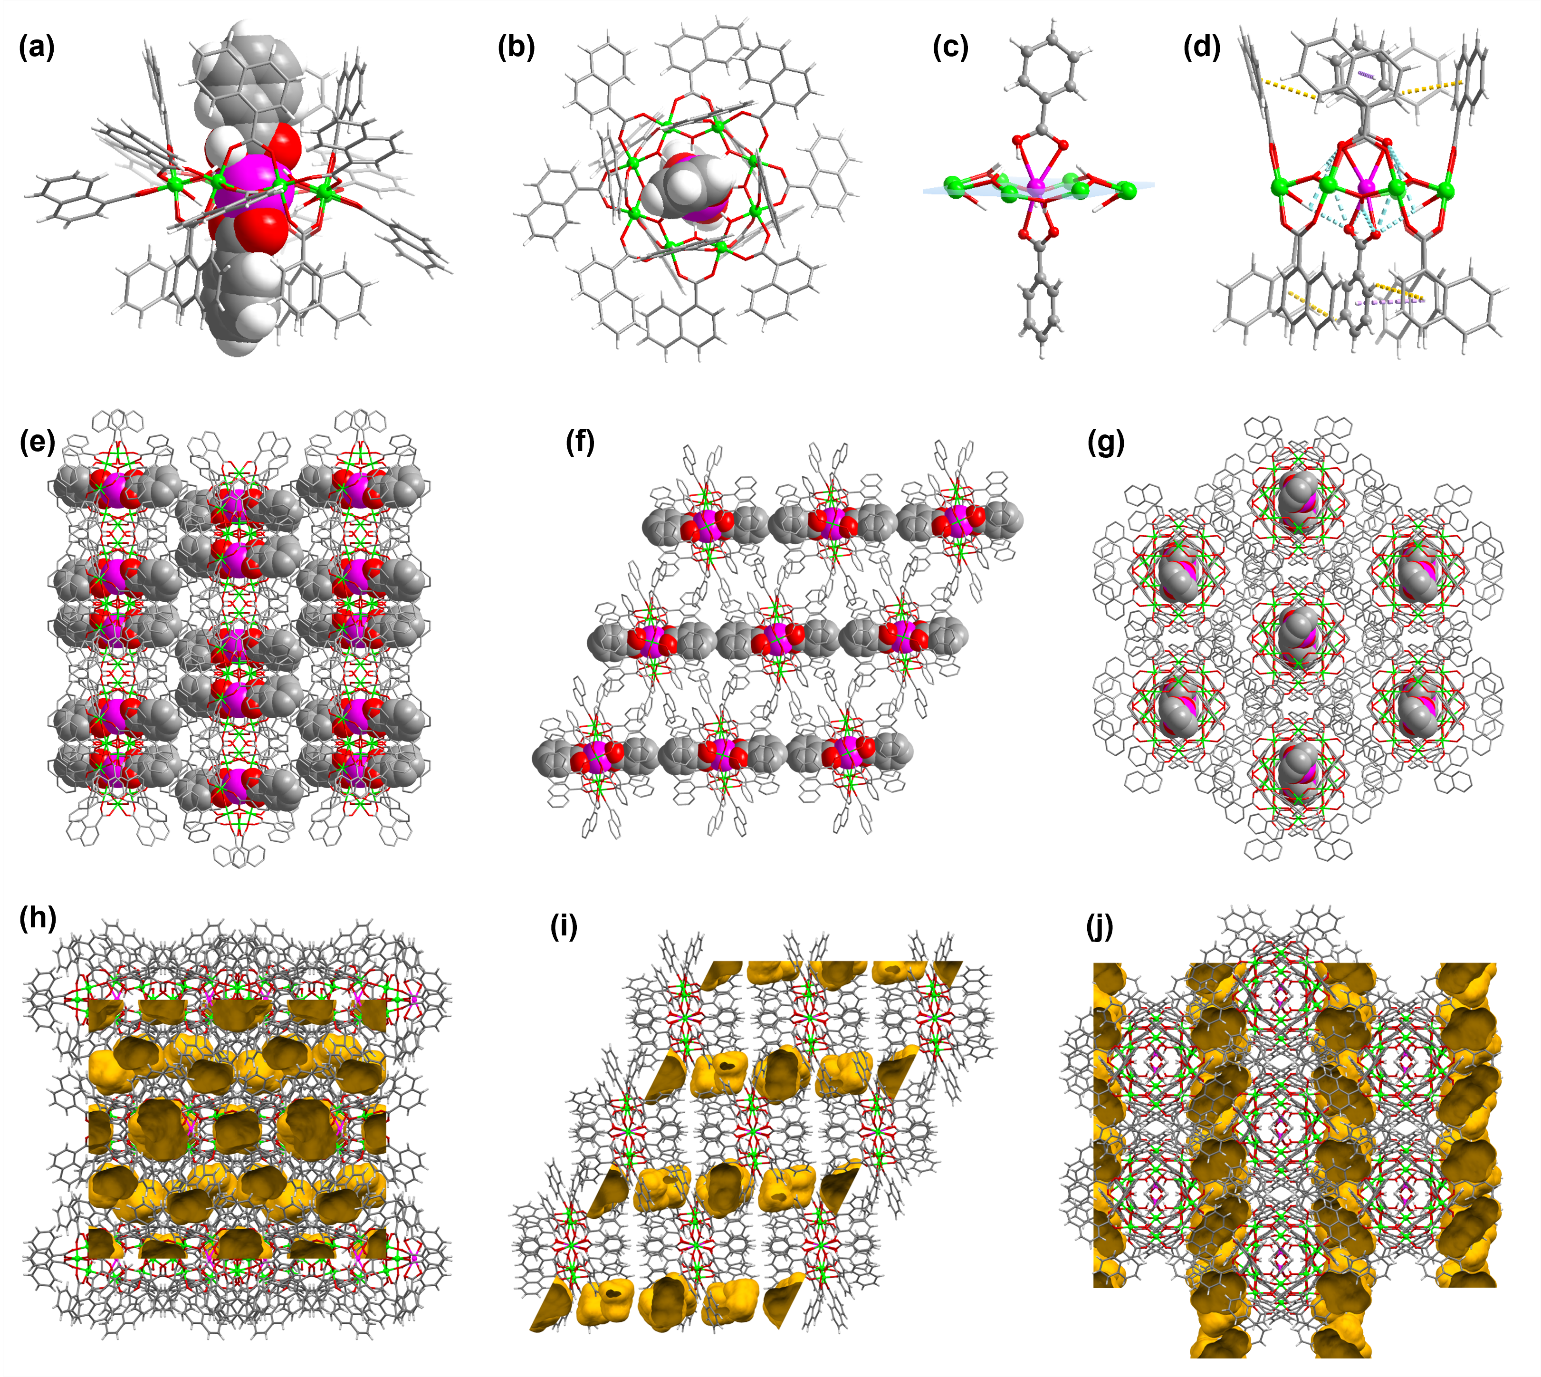


**Figure S65.** The structure and packing views of **AlOC-144**. (a) The side view of **AlOC-144**. (b) The top view of **AlOC-144**. (c) The distribution of AgH(BC)2 guest in **AlOC-144**. (d) The interactions between AgH(BC)2 guest and Al8 macrocycle. The strong O-H···O hydrogen-bond interactions, C-H···π interactions, π···π interactions are respectively highlighted by wathet dotted bonds, yellow dotted bonds and lilac dotted bonds. (e) The packing view of **AlOC-144** along the crystallographic a-axis. (f) The packing view of **AlOC-144** along the crystallographic b-axis. (g) The packing view of **AlOC-144** along the crystallographic c-axis. (h) The simulated pore surface strcuture of **AlOC-144** along the crystallographic a-axis through Mercury analysis. (i) The simulated pore surface strcuture of **AlOC-142** along the crystallographic b-axis through Mercury analysis. (j) The simulated pore surface strcuture of **AlOC-142** along the crystallographic c-axis through Mercury analysis. Color code: Al, green; O, red; C, grey; H, white; N, blue; Ag, pink.

**AlOC-144** crystallizes in monoclinic *I*2/*a* space group, contains one Al8 macrocycle and one AgH(BC)2 thread (Fig. S65a and S65b). The AgH(BC)2 thread is perpendicular to Al8(OH)8 plane and one H atom is disordered on four carboxylic acid oxygen atoms with 0.25 occupancy for each position (Fig. S65c). It interacts with Al8 macrocycle through 12 O-H…O hydrogen bonds (bond lengths: 2.943–3.483 Å), 4 C-H···π interactions (bond lengths: 3.764–3.844 Å) (Fig. S65d) and 2 π···π interactions (bond length: 3.847 Å). The Al8 macrocycles in **AlOC-144** were stacked parrallelly (Fig. S65e–S65g), and the calculated total solvent accessible porosity is 10.5% (Fig. S65h–S65j).


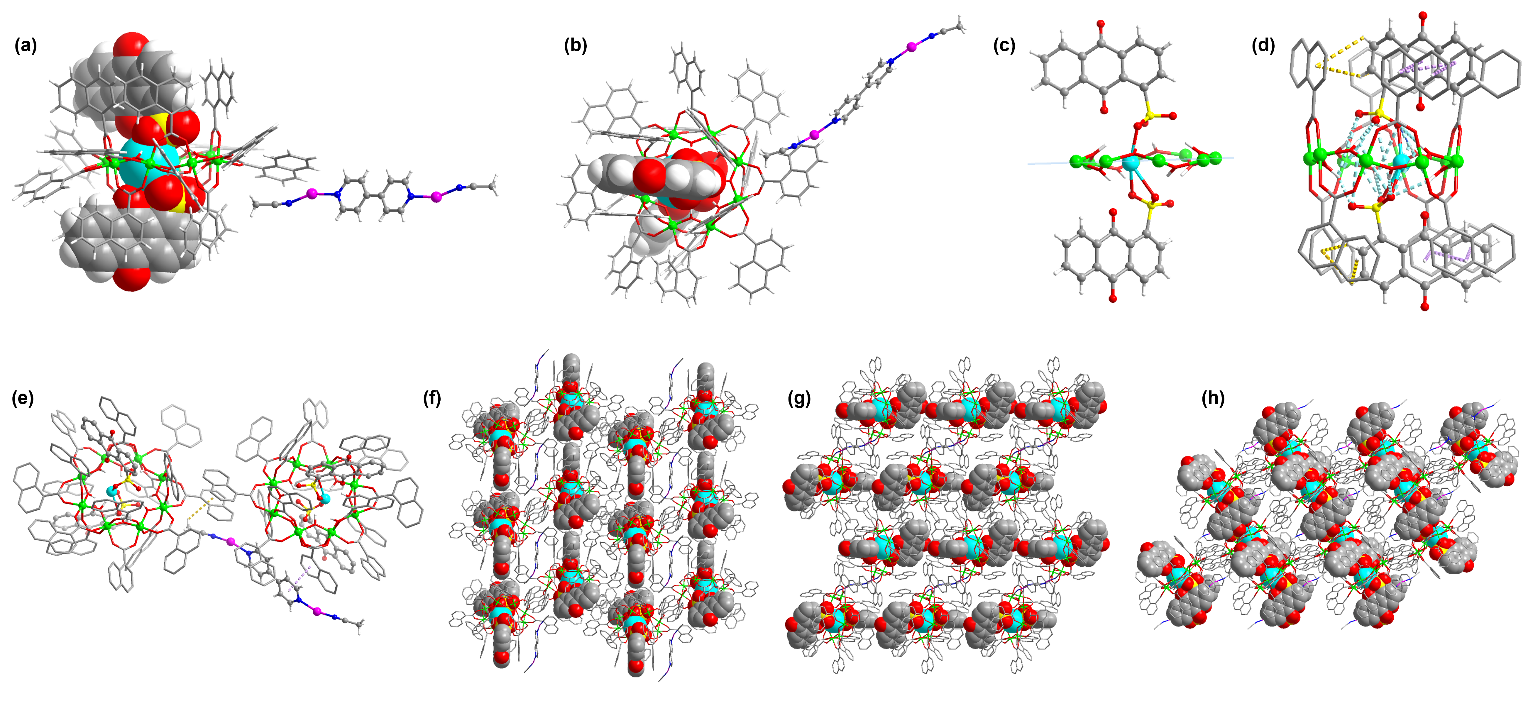


**Figure S66.** The structure and packing views of **AlOC-145**. (a) The side view of **AlOC-145**. (b) The top view of **AlOC-145**. (c) The distribution of Na(AQS)2– guest in **AlOC-145.** (d) The interactions between Na(AQS)2– guest and Al8 macrocycle. The strong O-H···O hydrogen-bond interactions, C-H···π interactions, π···π interactions are respectively highlighted by wathet dotted bonds, yellow dotted bonds and lilac dotted bonds. (e) The C-H···π and π···π interactions between [Ag2(bpy)(MeCN)2]+ and Al8 macrocycles. (f) The packing view of **AlOC-145** along the crystallographic a-axis. (g) The packing view of **AlOC-145** along the crystallographic b-axis. (h) The packing view of **AlOC-145** along the crystallographic c-axis. Color code: Al, green; O, red; C, grey; H, white; N, blue; Na, turquoise.

**AlOC-145** crystallizes in triclinic *P-1* space group, contains one Al8 macrocycle, one inner Na(AQS)2– thread and one outside [Ag2(bpy)(MeCN)2]+ chain (Fig. S66a and S66b). The Na(AQS)2– thread is perpendicular to Al8(OH)8 plane (Fig. S66c), and interacts with Al8 macrocycle through 18 O-H…O hydrogen bonds (bond lengths: 2.752–3.969 Å), 6 C-H···π interactions (bond lengths: 3.440–3.786 Å) and 6 π···π interactions (bond length: 3.601–3.766 Å) (Fig. S66d). The [Ag2(bpy)(MeCN)2]+ chain is located between two Al8 macrocycles and fixed by strong C-H···π (bond length: 3.954 Å) and π···π interactions (bond length: 3.556 Å) (Fig. S66e). The Al8 macrocycles in **AlOC-145** were stacked parrallelly (Fig. S66f–S66h), and the calculated total solvent accessible porosity is 5.8%.


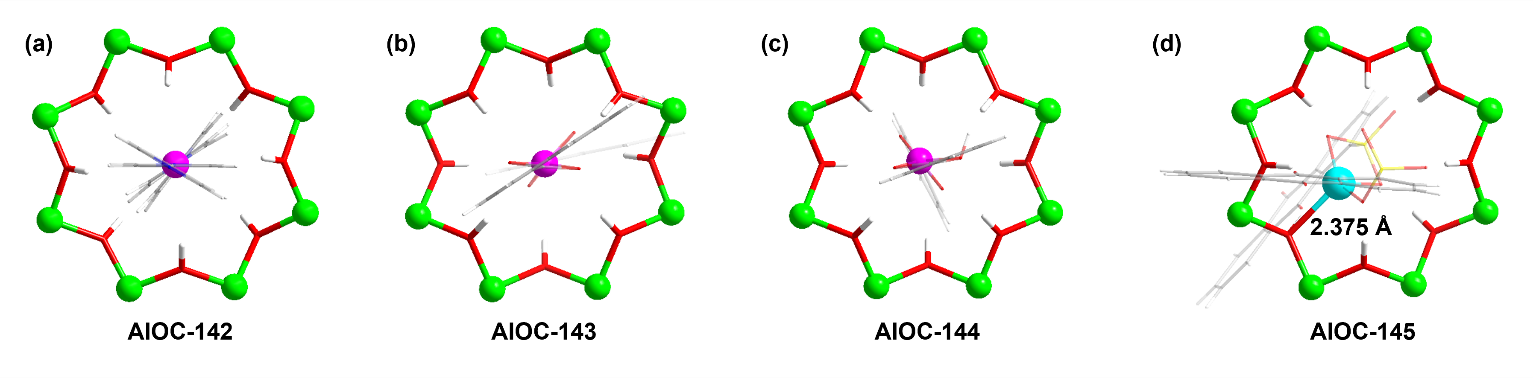


**Figure S67.** The distribution of metal ion in **AlOC-142** (a), **AlOC-143** (b), **AlOC-144** (c) and **AlOC-145** (d). Color code: Al, green; Ag, pink; Na, turquoise; O, red; C, grey; N, blue.


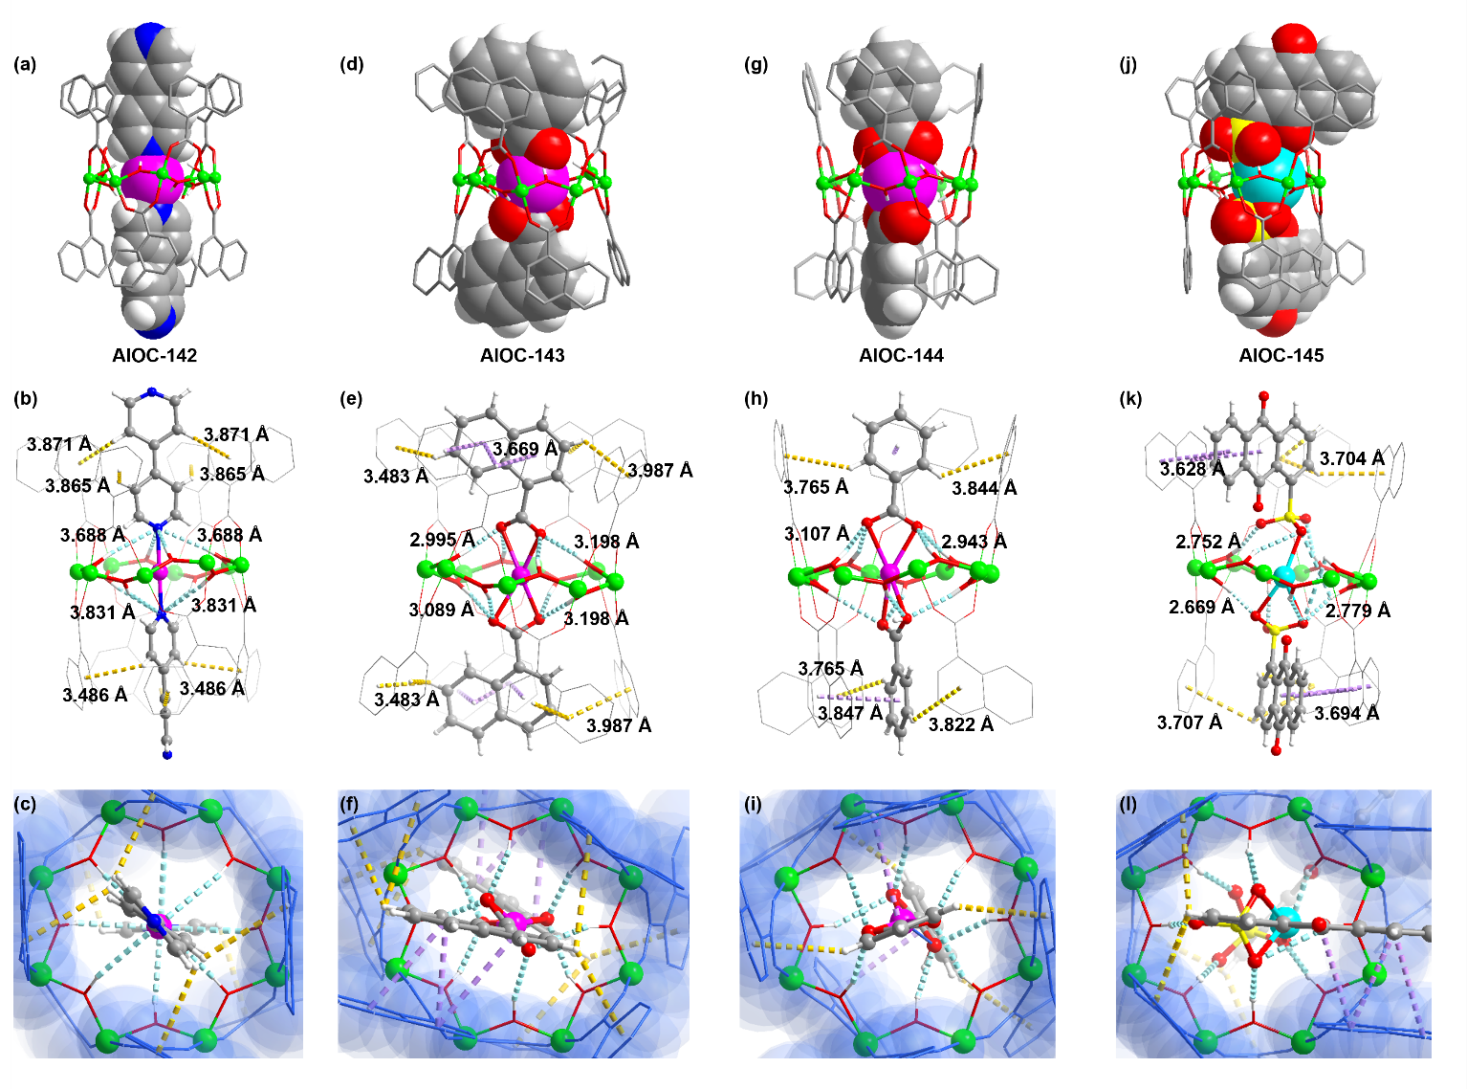


**Figure S68.** The embedded complex guests in Al8 macrocycle. (a, d, g and j) The distribution of guests in Al8 macrocycle in **AlOC-142**–**AlOC-145**. The coordinated equatorial NA ligand have been omitted for clarify. (b, e, h and k) The dominating interactions between complex guests and Al8 macrocycle. The strong hydrogen-bond interactions (O-H···O/N), C-H···π interactions, π···π interactions are respectively highlighted by wathet dotted bonds, yellow dotted bonds and lilac dotted bonds. (c, f, i and l) The top view of Al8 macrocycle with confined complex guests. Color code: Al, green; Ag, pink; Na, turquoise; O, red; C, grey; N, blue; H, white.


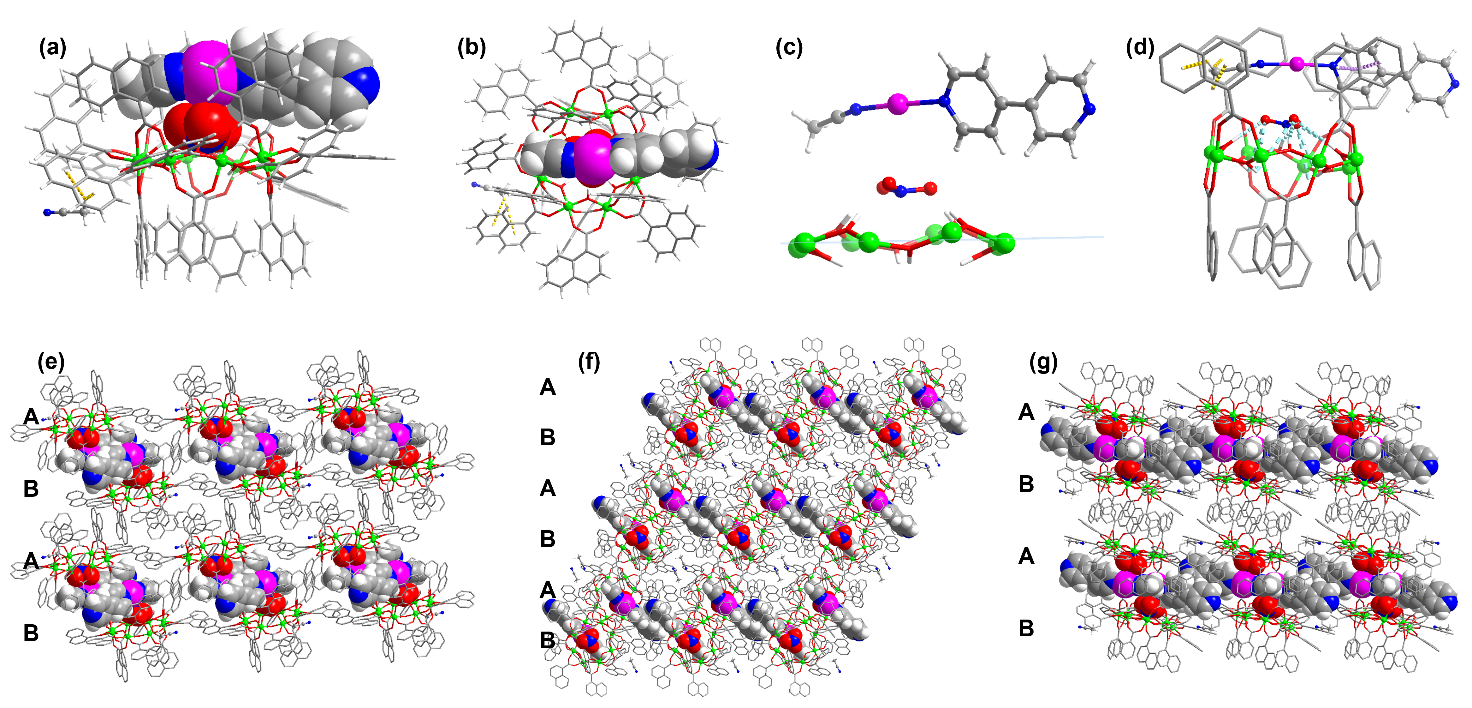


**Figure S69.** The structure and packing views of **AlOC-146**. (a) The side view of **AlOC-146**. (b) The top view of **AlOC-146**. (c) The distribution of NO3– and Ag(MeCN)(bpy)+ ion pair in **AlOC-146**. (d) The interactions between guests and Al8 macrocycle. The strong O-H···O hydrogen-bond interactions, C-H···π interactions, π···π interactions are respectively highlighted by wathet dotted bonds, yellow dotted bonds and lilac dotted bonds. (e) The packing view of **AlOC-146** along the crystallographic *a*-axis. (f) The packing view of **AlOC-146** along the crystallographic *b*-axis. (g) The packing view of **AlOC-146** along the crystallographic *c*-axis. Color code: Al, green; Ag, pink; O, red; C, grey; N, blue; H, white.

**AlOC-146** crystallizes in triclinic *P-1* space group, contains one Al8 macrocycle, one inner NO3– ion, one Ag(MeCN)(bpy)+ complex and one outside MeCN guest (Fig. S69a and S69b). The upper hydrophobic cavity of Al8 macrocycle is occupied by NO3– and Ag(MeCN)(bpy)+ ion pair, both of which are parallel to Al8(OH)8 plane (Fig. S69c). The NO3– interacts with Al8 macrocycle through ten O-H…O hydrogen bonds (bond lengths: 2.751–3.957 Å). The Ag(MeCN)(bpy)+ is located above NO3–and fixed by three C-H···π (bond lengths: 3.660–3.871 Å) and two π···π interactions (bond length: 3.773–3.857 Å) (Fig. S69d). The outside MeCN molecule also bonded with Al8 macrocycle through equatorial NA ligand with C-H···π bond lengths ranging from 3.939–3.996 Å. The Al8 macrocycles in **AlOC-146** were stacked alternatively in -ABAB- manner(Fig. S69e–S69g), and the calculated total solvent accessible porosity is 10.6%.


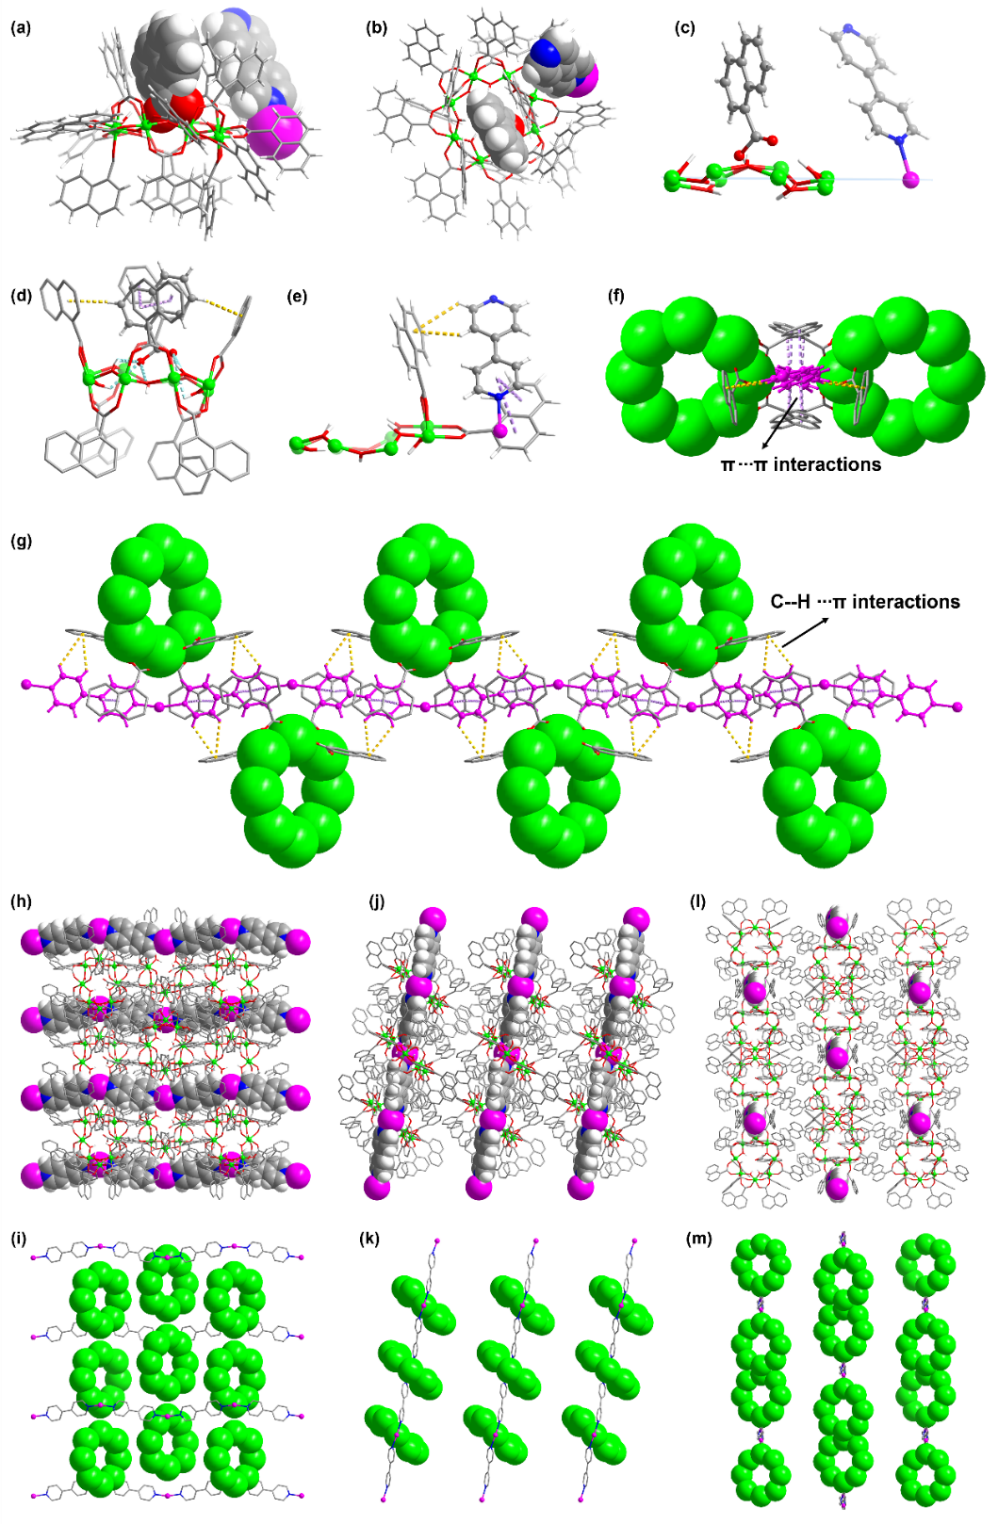


**Figure S70.** The structure and packing views of **AlOC-147**. (a) The side view of **AlOC-147**. (b) The top view of **AlOC-147**. (c) The distribution of NA– and Ag(bpy)+ guests in **AlOC-147**. (d) The interactions between NA– and Al8 macrocycle. (e, f and g) The interactions between Agn(bpy)nn+ and Al8 macrocycle. (h and i) The packing view of **AlOC-147** along the crystallographic *a*-axis. (j and k) The packing view of **AlOC-147** along the crystallographic *b*-axis. (l and m) The packing view of **AlOC-147** along the crystallographic *c*-axis. The strong O-H···O hydrogen-bond interactions, C-H···π interactions, π···π interactions are respectively highlighted by wathet dotted bonds, yellow dotted bonds and lilac dotted bonds. Color code: Al, green; Ag, pink; O, red; C, grey; N, blue; H, white.

**AlOC-147** crystallizes in mnoclinic *Cc* space group, its unit cell contains one Al8 macrocycle, one inner NA– guest and one outside Ag(bpy)+ complex (Fig. S70a–S70c). The inner NA– guest interacts with Al8 macrocycle through seven O-H…O hydrogen bonds (bond lengths: 2.726–3.478 Å), three C-H···π (bond lengths: 3.656–3.987 Å) and three π···π interactions (bond lengths: 3.688–3.925 Å) (Fig. S70d). The outside [Agn(bpy)n]n+ chain also bonded with Al8 macrocycle through C-H···π interactions (bond lengths: 3.655–3.761 Å) and π···π interactions (bond lengths: 3.601–3.741 Å) (Fig. S70e–S70g). The Al8 macrocycles and polymer chains in **AlOC-147** were stacked alternatively when viewed along *c* axis (Fig. S70h–S70m), and the calculated total solvent accessible porosity is 22.6%.


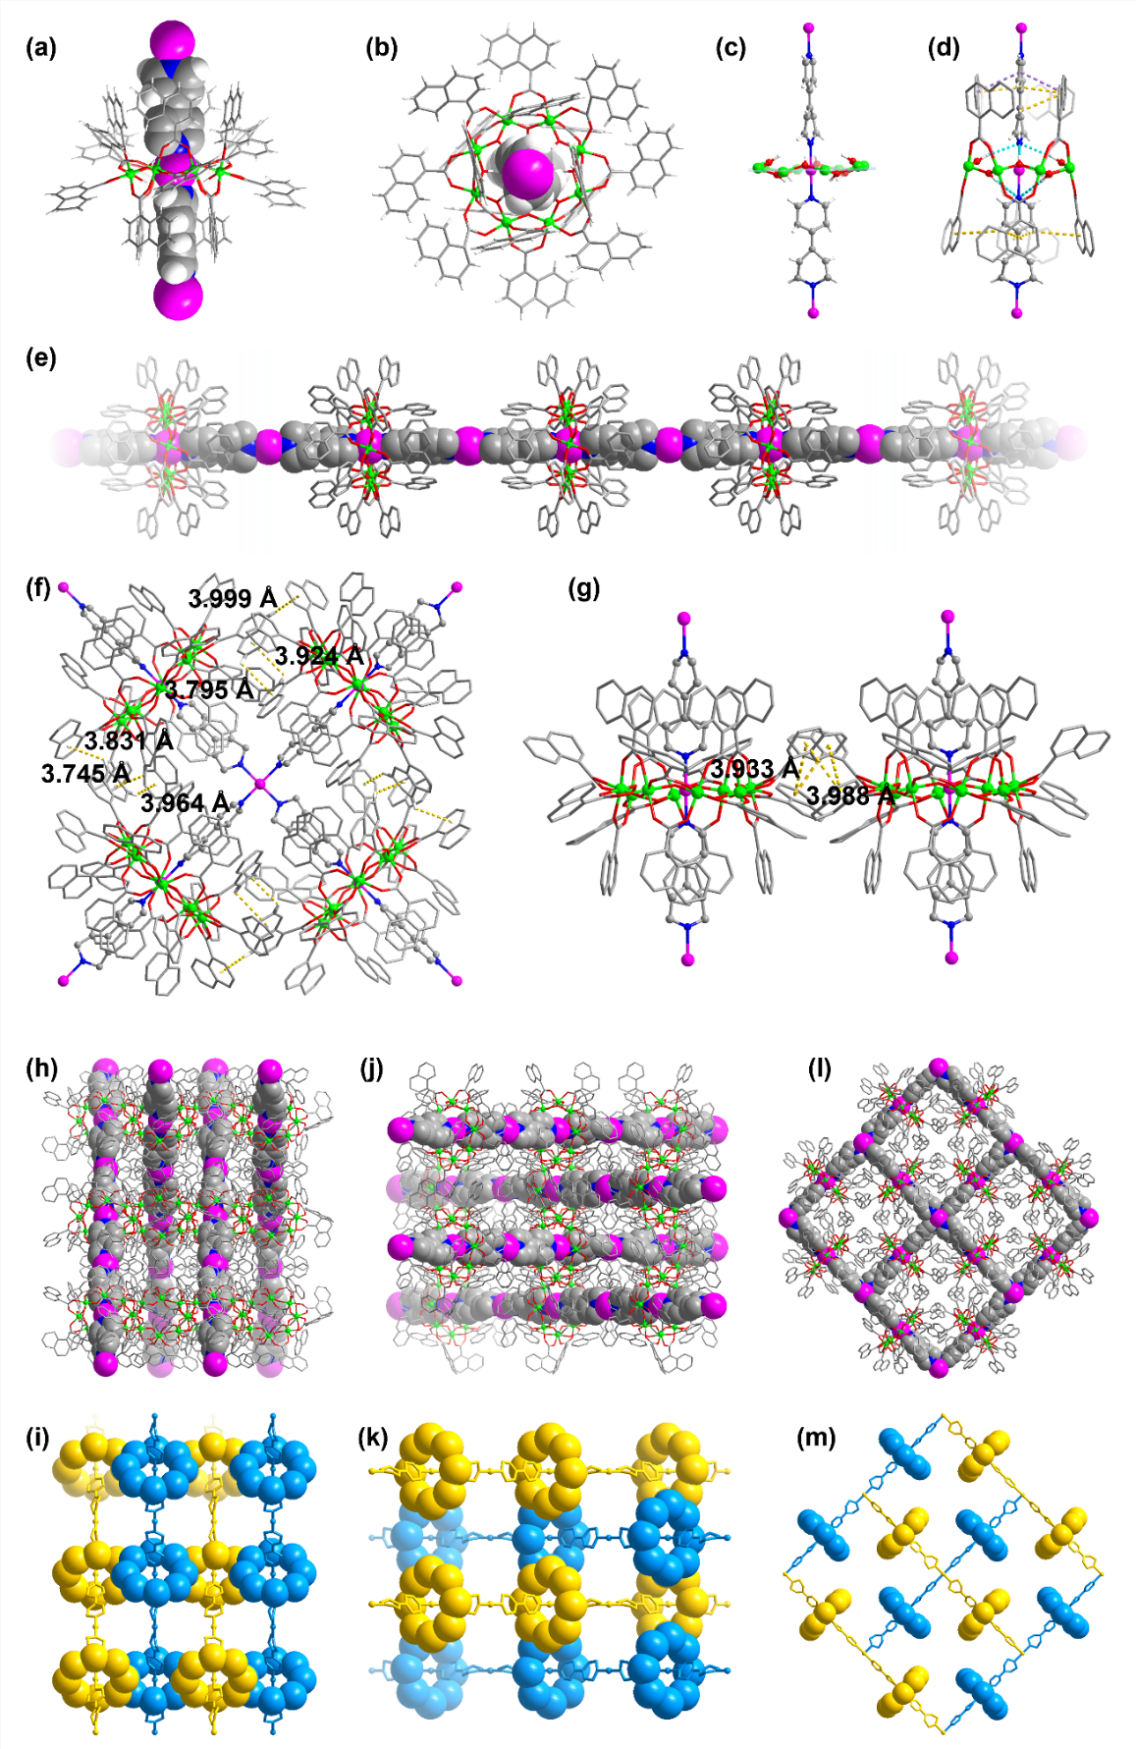


**Figure S71.** The structure and packing views of **AlOC-148**. (a) The side view of **AlOC-148**. (b) The top view of **AlOC-148**. (c) The distribution of Ag2(bpy)22+ guests in **AlOC-148**. (d) The interactions between Ag2(bpy)2+ guests and Al8 macrocycle. (e) The 1D penetrative polyrotaxane in **AlOC-148**. (f) The C-H···π interactions between two vertical polyrotaxanes in *ab* plane. (g) The π···π interactions between two parallel polyrotaxanes along the *c* axis. (h and i) The packing view of **AlOC-148** along the crystallographic *a*-axis. (j and k) The packing view of **AlOC-148** along the crystallographic *b*-axis. (l and m) The packing view of **AlOC-148** along the crystallographic *c*-axis. The strong O-H···N hydrogen-bond interactions, C-H···π interactions, π···π interactions are respectively highlighted by wathet dotted bonds, yellow dotted bonds and lilac dotted bonds. Color code: Al, green; Ag, pink; O, red; C, grey; N, blue; H, white.

**AlOC-148** crystallizes in tetragonal *P*-4n2 space group, its unit cell contains one Al8 macrocycle, one inner Ag2(bpy)22+ guest and two unresolved NO3– counterion (Fig. S71a and S71b). The inner Ag2(bpy)22+ guest is perpendicular to Al8(OH)8 plane and interacts with Al8 macrocycle through eight O-H…N hydrogen bonds (bond lengths: 3.609–3.852 Å), seven C-H···π (bond length: 3.531–4.014 Å) and two π···π interactions (bond lengths: 4.168 Å) (Fig. S71c and S71d). The neighboring two Ag2(bpy)22+ threads can combined together through Ag–N bonds generating main-chain penetrative polyrotaxane (Fig. S71e). The polyrotaxane chains are arranged vertically in *ab* plane (Fig. S71f) and stacked parallelly along *c* axis (Fig. S71g). Such dense packing mode leads to lower solvent accessible porosity with calculated value of 6.6% (Fig. S71h–S71m).


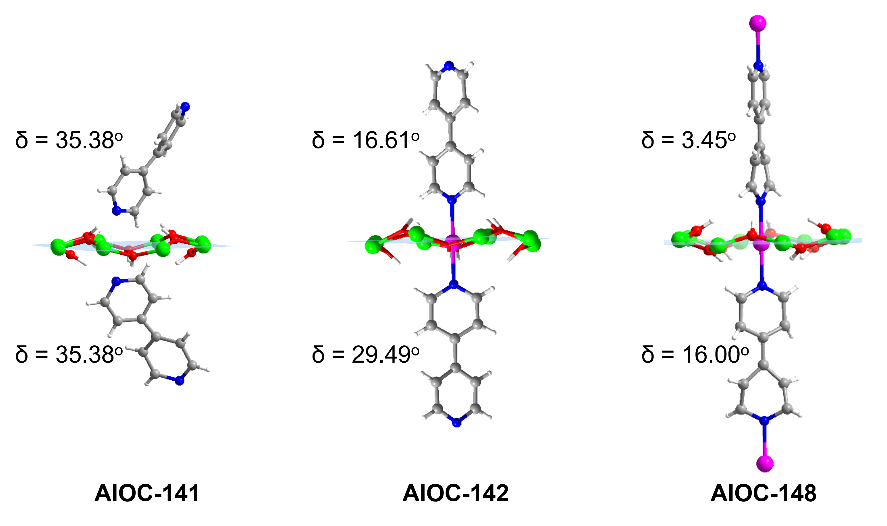


**Figure S72.** Dihedral angles of two pyridine rings for confined bpy. Color code: Al, green; Ag, pink; O, red; C, grey; N, blue; H, white.


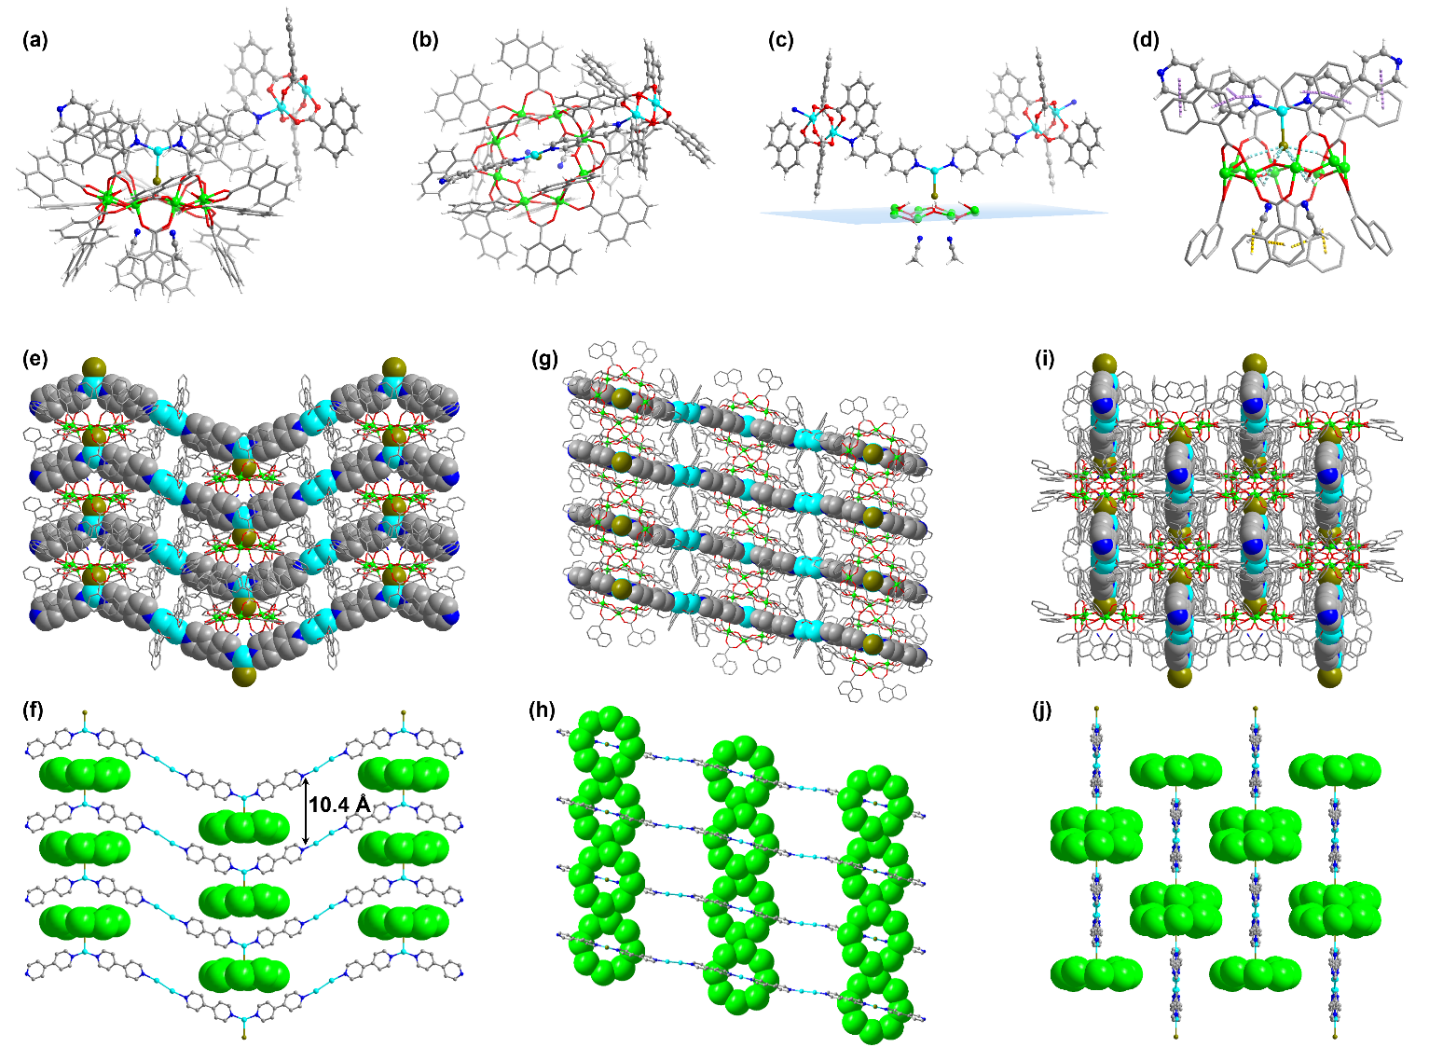


**Figure S73.** The structure and packing views of **AlOC-149**. (a) The side view of **AlOC-149**. (b) The top view of **AlOC-149**. (c) The distribution of CuBr(bpy)2Cu2(NA)4 and two MeCN guests in **AlOC-149**. (d) The interactions between guests and Al8 macrocycle. (e and f) The packing view of **AlOC-149** along the crystallographic *a*-axis. (g and h) The packing view of **AlOC-149** along the crystallographic *b*-axis. (i and j) The packing view of **AlOC-149** along the crystallographic *c*-axis. The strong O-H…O hydrogen-bond interactions, C-H···π interactions, π···π interactions are respectively highlighted by wathet dotted bonds, yellow dotted bonds and lilac dotted bonds. Color code: Al, green; O, red; C, grey; N, blue; H, white; Br, dark yellow; Cu, turquoise.

**AlOC-149** crystallizes in tetragonal *C*2*/*cspace group, its unit cell contains one Al8 macrocycle, one CuBr(bpy)2Cu2(NA)4 guest and two MeCN molecules (Fig. S73a and S73b). The CuBr(bpy)2Cu2(NA)4 guest is located in the above hydrophobic cavity and interacts with Al8 macrocycle through eight O-H···Br hydrogen bonds (bond lengths: 3.464–3.914 Å) and eight π···π interactions (bond lengths: 3.662–4.014 Å) (Fig. S73c and S73d). While two MeCN guests are confined in the lower hydrophobic cavity and bonded to Al8 macrocycle through C-H···π interactions (bond lengths: 3.889–4.033 Å). The CuBr(bpy)2Cu2(NA)4 guests are extended infinitely along c axis through Cu–N bonds generating zigzag side-chain polyrotaxane (Fig. S70e–S70j). The polyrotaxane chains are further arranged parallelly in 3D space with calculated total solvent accessible porosity of 6.7%.


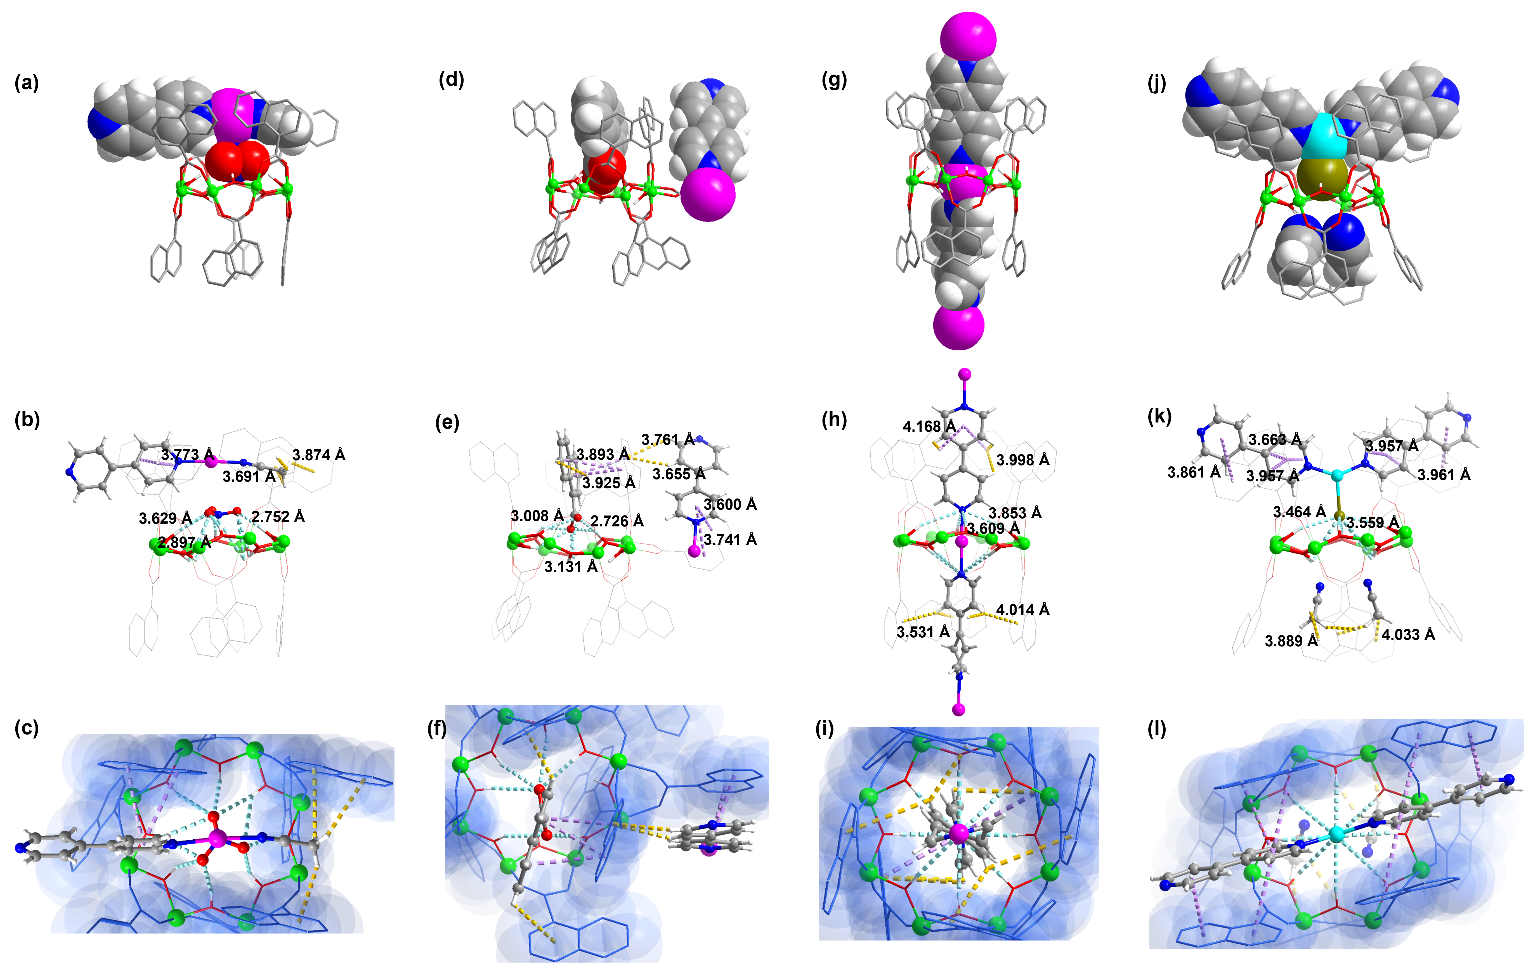


**Figure S74.** The embedded complex guests in Al8 macrocycle. (a, d, g and j) The distribution of guests in Al8 macrocycle in **AlOC-142**–**AlOC-145**. The coordinated equatorial NA ligand have been omitted for clarify. (b, e, h and k) The dominating interactions between complex guests and Al8 macrocycles. The strong hydrogen-bond interactions (O-H···O/Br/N), C-H···π interactions, π···π interactions are respectively highlighted by wathet dotted bonds, yellow dotted bonds and lilac dotted bonds. (c, f, i and l) The top view of Al8 macrocycle with confined complex guests. Color code: Al, green; Ag, pink; O, red; C, grey; N, blue; H, white; Br, dark yellow; Cu, turquoise.


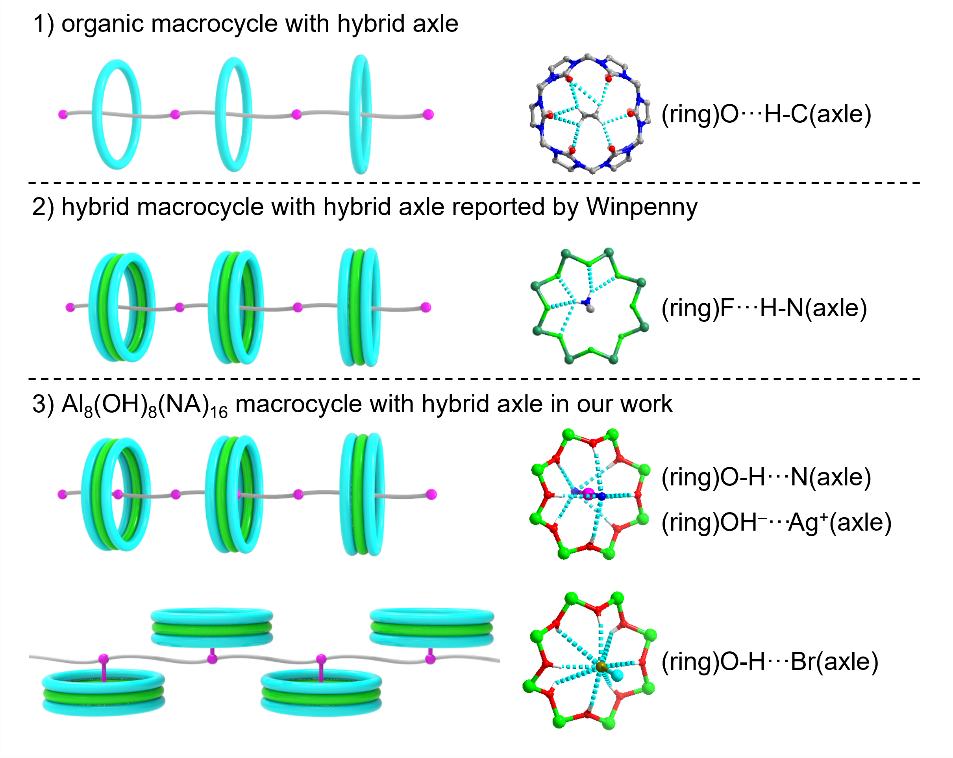


**Figure S75.** The comparison of polyrotaxane types and non-covalent interactions in macrocycle centre. Type 1) is reported by Zang et al.20 Color code for structure in Type 1): O, red; C, grey; N, blue. Type 2) is reported by Winpenny et al.21 Color code for structure in Type 2): Cr/M heterometallic sites, sea green; C, grey; N, blue; F, green. Type 3) are found in our work. Color code for structure in Type 3): Al, green; O, red; N, blue; H, white; Br, dark yellow; Cu, turquoise; Ag, pink.


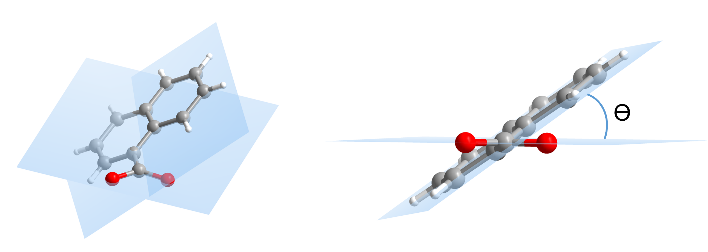


**Figure S76.** The torsion angle (θ) diagram in NA– ligand. Color code: O, red; C, grey; H, white.

**Table S20.** The Ө value of eight non-equatorial NA– ligands in **AlOC-137**–**AlOC-149**.

|  | Guest in  upper cavity | Ө1 | Ө2 | Ө3 | Ө4 | Guest in  upper cavity | Ө5 | Ө6 | Ө7 | Ө8 |
| --- | --- | --- | --- | --- | --- | --- | --- | --- | --- | --- |
| **AlOC-137** | MeCN | 32.9 | 33.3 | 18.4 | 24.0 | 2MeCN | 12.1 | 8.6 | 19.2 | 23.5 |
| **AlOC-138** | 2MeCN+NA | 27.6 | 27.6 | 24.1 | 24.1 | ― | 25.6 | 25.6 | 42.4 | 42.4 |
| **AlOC-139** | MeCN+NA | 59.4 | 38.0 | 27.3 | 17.9 | NA | 63.4 | 31.7 | 25.9 | 27.5 |
| **AlOC-140** | HBA | 20.4 | 13.0 | 21.3 | 12.6 | HBA | 20.4 | 13.0 | 21.3 | 12.6 |
| **AlOC-141** | bpy | 21.7 | 6.7 | 10.9 | 12.2 | bpy | 21.7 | 6.7 | 10.9 | 12.2 |
| **AlOC-142** | 1/2Ag(bpy)2 | 27.4 | 27.4 | 13.3 | 13.3 | 1/2Ag(bpy)2 | 22.0 | 22.0 | 2.5 | 2.5 |
| **AlOC-142**  **after heating** | 1/2Ag(bpy)2 | 27.9 | 27.9 | 16.0 | 16.0 | 1/2Ag(bpy)2 | 22.3 | 22.3 | 0.8 | 0.8 |
| **AlOC-143** | 1/2Ag(NA)2 | 2.3 | 25.6 | 11.6 | 39.6 | 1/2Ag(NA)2 | 2.3 | 25.6 | 11.6 | 39.6 |
| **AlOC-144** | 1/2Ag(BA)2H | 9.9 | 11.9 | 16.6 | 16.3 | 1/2Ag(BA)2H | 9.9 | 11.9 | 16.6 | 16.3 |
| **AlOC-145** | 1/2Na(AQS)2 | 37.6 | 47.3 | 10.2 | 5.8 | 1/2Na(AQS)2 | 9.3 | 49.9 | 50.7 | 8.2 |
| **AlOC-146** | NO3– +  Ag(MeCN)(bpy) | 32.2 | 47.5 | 30.7 | 38.3 | ― | 38.6 | 17.3 | 5.9 | 52.8 |
| **AlOC-147** | NA | 53.1 | 28.7 | 20.8 | 17.1 | ― | 16.9 | 29.1 | 24.7 | 61.2 |
| **AlOC-148** | 1/2Agn(bpy)n | 35.5 | 35.5 | 11.7 | 11.7 | 1/2Agn(bpy)n | 14.5 | 14.5 | 16.6 | 16.6 |
| **AlOC-149** | CuBr(bpy)2 | 47.8 | 47.8 | 39.5 | 39.5 | 2MeCN | 22.4 | 22.4 | 22.8 | 22.8 |


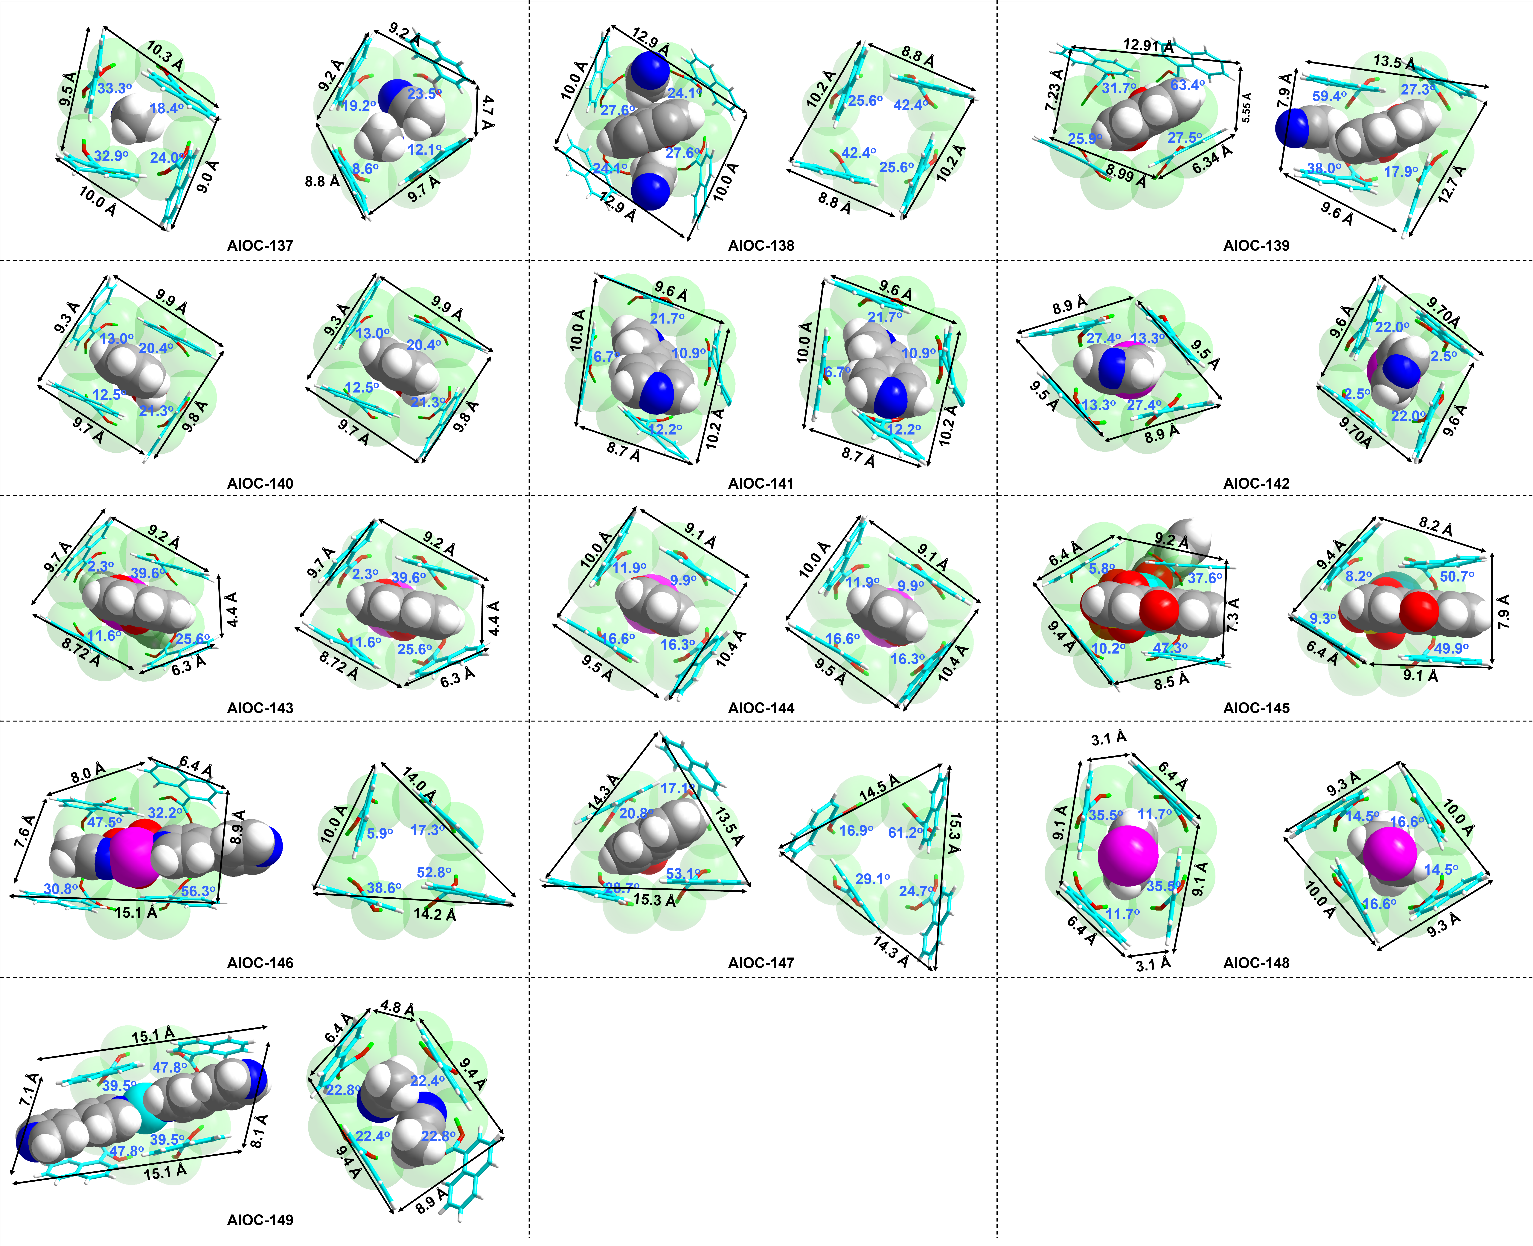


**Figure S77.** The conformation variation for hydrophobic cavities on Al8 macrocycle. Color code: Al, green; Ag, pink; Na, teal; Cu, turquoise; O, red; C, grey; S, yellow; N, blue; H, white.


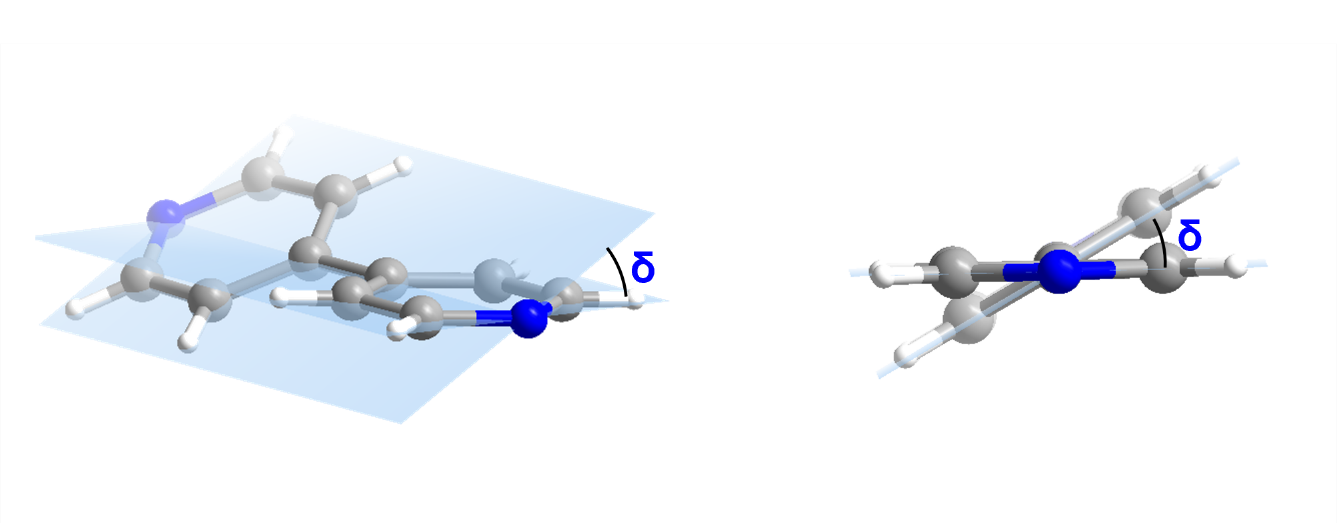


**Figure S78.** The [dihedral](file:///H:\ruanjian\general%20software\Youdao\Dict\7.5.2.0\resultui\dict\?keyword=dihedral) angle (δ) diagram in bpy. Color code: N, blue; C, grey; H, white.


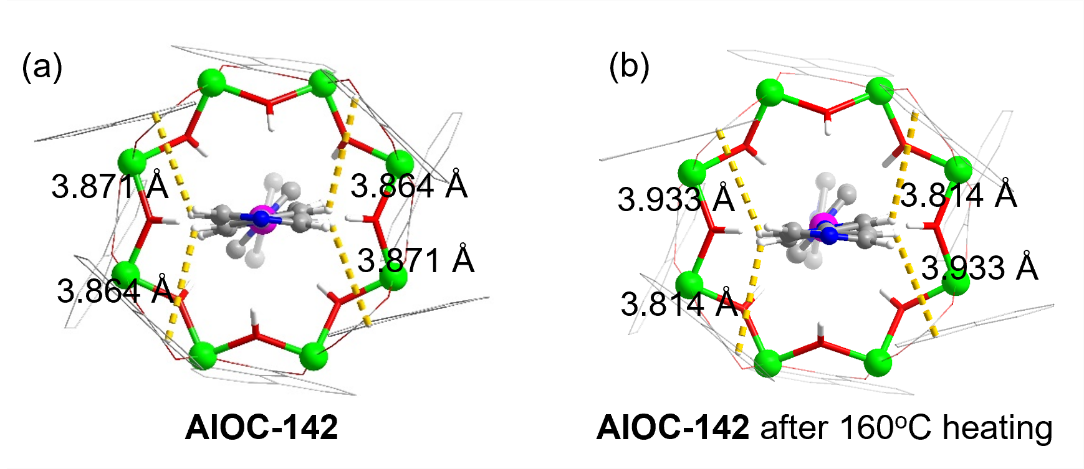


**Figure S79.** The C-H···π interactions between Ag(bpy)2+ and Al8 macrocycle in **AlOC-142** before and after heating. Color code: Al, green; Ag, pink; O, red; C, grey; N, blue; H, white.

1. **NLO analyses**





**Figure S80.** The open-aperture Z-scan results at 532 nm for **AlOC-137** under different energy.





**Figure S81.** The open-aperture Z-scan results at 532 nm for **AlOC-139** under different energy.





**Figure S82.** The open-aperture Z-scan results at 532 nm for **AlOC-140** under different energy.





**Figure S83.** The open-aperture Z-scan results at 532 nm for **AlOC-142** under different energy.





**Figure S84.** The open-aperture Z-scan results at 532 nm for **AlOC-143** under different energy.





**Figure S85.** The open-aperture Z-scan results at 532 nm for **AlOC-144** under different energy.

**Figure S86.** The open-aperture Z-scan results at 532 nm for **AlOC-148** under different energy.

**Table S21.** The list of nonlinear parameters for **AlOC-137**, **AlOC-139**, **AlOC-140**, **AlOC-142**, **AlOC-143**, **AlOC-144**, **AlOC-148** and **AlOC-142 after heating**.

|  | **T (%)** | **α(cm-1)** | **β(cm/GW)** | ***Imχ*(3) (×10-13 esu)** | **FOM (×10-14 esu)** | **FOL (J/cm2)** |
| --- | --- | --- | --- | --- | --- | --- |
| **AlOC-137** | 0.64 | 0.45 | 0.42 | 0.54 | 0.12 | 14.873 |
| **AlOC-139** | 0.63 | 0.46 | 4.56 | 5.89 | 1.27 | 0.079 |
| **AlOC-140** | 0.65 | 0.43 | 3.11 | 4.01 | 0.93 | 0.068 |
| **AlOC-142** | 0.74 | 0.30 | 0.86 | 1.11 | 0.37 | 1.194 |
| **AlOC-143** | 0.61 | 0.49 | 16.05 | 20.71 | 4.19 | 0.042 |
| **AlOC-144** | 0.70 | 0.36 | 4.82 | 6.22 | 1.74 | 0.066 |
| **AlOC-148** | 0.75 | 0.29 | 1.95 | 2.52 | 0.87 | 0.139 |
| **AlOC-142**  **after heating** | 0.76 | 2.74 | 17.5 | 20.7 | 0.75 | 2.363 |

**Table S22.** The nonlinear parameters of some reported materials measured in solution.

| **No.** | **Compounds** | **Measurement conditions** | **β(cm/GW)** | ***Imχ*(3) (×10-13 esu)** | **FOM (×10-14 esu)** | **FOL (J/cm2)** | **Ref.** |
| --- | --- | --- | --- | --- | --- | --- | --- |
| 1 | Cu50(PhCOO)10(4-F-PhS)20(PPh3)6H2 | in DMF | 12.5 | 27.3 | 43 | ˃10 | 22 |
| 2 | Pt-Ni NP/rGO | in water | 1.64 | – | – | – | 23 |
| 3 | Pt-Ni cluster/rGO | in water | 1.98 | – | – | – | 23 |
| 4 | [Ni(1,2-BIB)(CEDA)]∙1.5H2O | in DMSO | 10.1 | 35.4 | – | – | 24 |
| 5 | [Zn(1,2-BIB)(CADA)] | in DMSO | 4.2 | 14.7 | – | – | 24 |
| 6 | [Zn2(1,4-BIB)2(CADA)2]∙2H2O | in DMSO | 4.6 | 16.1 | – | – | 24 |
| 7 | {[ET4N][Ag2I3]}n | in CH2Cl2 | 3.04 | – | – | – | 25 |
| 8 | [(HgI2(4,4-azpy)]n | in CH2Cl2 | 1.3 | – | – | – | 25 |
| 9 | AlOC-76 | in solution | 0.61 | 2.38 | 2.87 | 0.009 | 26 |
| 10 | 4Br4MSP | in DMF | 5.5×10-5 | 4.6×10-12 | – | – | 27 |
| 11 | P3HT-MoS2 | in chloroform | 5.5 | – | – | – | 28 |
| 12 | MoS2 | in ethanol/water | 1.5 | – | – | – | 28 |
| 13 | [Ni6(Py)6(H2O)5(μ3−OH)3(PW9O34)]2·10H2O | in DMSO | 0.003384 | – | – | – | 29 |
| 14 | [H2N(CH3)2]12.5(H3N(CH2)2NH3)(H3O)1.5(VIIIμ2-OH)8(SO4)16·2H2O | in water | 0.008377 | – | – | – | 30 |
| 15 | [(C4O6H2)2V4O8]·2C6N2H18 | in water | 0.003167 | – | – | – | 31 |

**Figure S87.** The OL curve for **AlOC-137**.

**Figure S88.** The OL curve for **AlOC-139**.

**Figure S89.** The OL curve for **AlOC-140**.

**Figure S90.** The OL curve for **AlOC-142**.

**Figure S91.** The OL curve for **AlOC-143**.

**Figure S92.** The OL curve for **AlOC-144**.

**Figure S93.** The OL curve for **AlOC-148**.

**Figure S94.** The OA Z-scan curve for **AlOC-142** after heating at 160oC for 12h.

**Figure S95.** The curve of output fluence versus input fluence for **AlOC-142** after heating at 160oC for 12h.

**Figure S96.** The OL curve for **AlOC-142** after heating at 160oC for 12h.

# References

1. Wendlandt, W. W. & Hecht, H. G. *Reflectance spectroscopy; interscience*. *New York* (1966).

2. Sheldrick, G. M. *SHELXL-2014 Program for Crystal Structure Solution and Refinement, (Univerity of Göttingen, Göttingen, Germany,*2014*).*

3. Tang, Z. et al. XEDA, a fast and multipurpose energy decomposition analysis program. *J. Comput. Chem.* **42**, 2341–2351 (2021).

4. Su, P., Tang, Z. & Wu, W. Generalized kohn-sham energy decomposition analysis and its applications. *WIREs Comput. Mol. Sci.* **10**, e1460 (2020).

5. Schill, G. & Zollenkopf, H. Rotaxane. *Nachr. Chem. Techn.* **15**, 149–150 (1967).

6. Agam, G., Graiver, D. & Zilkha, A. Studies on the formation of topological isomers by statistical methods. *J. Am. Chem. Soc.* **98**, 5206–5214 (1976).

7. Ogino, H. Relatively high-yield syntheses of rotaxanes. Syntheses and properties of compounds consisting of cyclodextrins threaded by α,ω-diaminoalkanes coordinated to cobalt(III) complexes. *J. Am. Chem. Soc.* **103**, 1303–1304 (1981).

8. Anelli, P. L., Spencer, N. & Stoddart, J. F. A molecular shuttle. *J. Am. Chem. Soc.* **113**, 5131–5133 (1991).

9. Wu, C., Lecavalier, P. R., Shen, Y. X. & Gibson, H. W. Synthesis of a rotaxane via the template method. *Chem. Mater.* **3**, 569-572 (1991).

10. Lindoy, L. F. New ribbons and threads. *Nature* **376**, 293–294 (1995).

11. Jeon, Y.-M., Whang, D., Kim, J. & Kim, K. A simple construction of a rotaxane and pseudorotaxane: Syntheses and X-ray crystal structures of cururbituril threaded on substituted spermine. *Chem. Lett.* **25**, 503–504 (1996).

12. Arduini, A., Ferdani, R., Pochini, A., Secchi, A. & Ugozzoli, F. Calix[6]arene as a wheel for rotaxane synthesis. *Angew. Chem.* **112**, 3595–3598 (2000).

13. Chang, S.-Y., Choi, J. S. & Jeong, K.-S. Self-assembly and dynamics of [2]- and [3]rotaxanes with a dinuclear macrocycle containing reversible Os−N coordinate bonds. *Chem. Eur. J.* **7**, 2687–2697 (2001).

14. Larsen, F. K. et al. Synthesis and characterization of heterometallic {Cr7M} wheels. *Angew. Chem. Int. Ed.* **42**, 101–105 (2003).

15. Thordarson, P., Bijsterveld, E. J. A., Rowan, A. E. & Nolte, R. J. M. Epoxidation of polybutadiene by a topologically linked catalyst. *Nature* **424**, 915–918 (2003).

16. Lee, E. Y. & Suh, M. P. A robust porous material constructed of linear coordination polymer chains: Reversible single-crystal to single-crystal transformations upon dehydration and rehydration. *Angew. Chem. Int. Ed.* **43**, 2798–2801 (2004).

17. Gao, C.-Y., Zhao, L. & Wang, M.-X. Designed synthesis of metal cluster-centered pseudo-rotaxane supramolecular architectures. *J. Am. Chem. Soc.* **133**, 8448–8451 (2011).

18. Lee, S., Chen, C.-H. & Flood, A. H. A pentagonal cyanostar macrocycle with cyanostilbene CH donors binds anions and forms dialkylphosphate [3]rotaxanes. *Nat. Chem.* **5**, 704–710 (2013).

19. Liu, C. et al. Assembly of interlocked superstructures with a titanium oxide molecular ring in water. *Inorg. Chem.* **60**, 14520–14524 (2021).

20. Li, N.-N. et al. Ensembles from silver clusters and cucurbit[6]uril-containing linkers. *Dalton Trans.* **50**, 15267-15273 (2021).

21. Whitehead, G. F. S. et al. Rings and threads as linkers in metal-organic frameworks and poly-rotaxanes. *Chem. Commun.* **49**, 7195–7197 (2013).

22. Sun, J. et al. Labile ligands protected Cu50 nanoclusters with tailorable optical limiting effect. *ACS Materials Lett.* **6**, 281–289 (2024).

23. Zheng, C. et al. Facile control of metal nanoparticles from isolated nanoparticles to aggregated clusters on two-dimensional graphene to form optical limiters. *J. Mater. Chem. C* **5**, 11579–11589 (2017).

24. Liu, R.-Q. et al. Enhanced third-order nonlinear optical properties of three 2D coordination polymers based on bis(imidazole) ligands and dicarboxylic ligands. *Polyhedron* **111**, 16–25 (2016).

25. Zhou, J.-L., Chen, Q.-Y., Gu, Y.-Y., Mei, G.-Q. & Yang, H.-W. Syntheses, crystal structures and third-order nonlinear optical properties of coordination polymers {[Et4N][Ag2I3]}n and [CuBr(C10H8N2S2)]n. *Transition Met. Chem.* **30**, 1036–1041 (2005).

26. Li, Y. et al. Record aluminum molecular rings for optical limiting and nonlinear optics. *Angew. Chem. Int. Ed.* **61**, e202116563 (2022).

27. D'silva, E. D., Podagatlapalli, G. K., Venugopal Rao, S. & Dharmaprakash, S. M. Study on third-order nonlinear optical properties of 4-methylsulfanyl chalcone derivatives using picosecond pulses. *Mater. Res. Bull.* **47**, 3552-3557 (2012).

28. Zhao, M. et al. Unexpected optical limiting properties from MoS2 nanosheets modified by a semiconductive polymer. *Chem. Commun.* **51**, 12262–12265 (2015).

29. Wang, J.-L. et al. Two Ni-substituted trilacunary keggin-type polyoxometalates: Syntheses, crystal structures, NLO studies, and magnetic properties. *Inorg. Chem.* **60**, 13748–13755 (2021).

30. Cao, J. P. et al. Exploring the magnetic interaction of asymmetric structures based on chiral VIII8 clusters. *Inorg. Chem.* **58**, 2645–2651 (2019).

31. Cao, J. et al. A pair of new chiral polyoxovanadates with decent NLO properties. *Dalton Trans.* **47**, 6054–6058 (2018).
